# Supplementary material
Source: PubMed Central journal article supplement (PMC1435799)
Supplement: plntphys_140_4_1183__1.pdf [file plntphys_140_4_1183__1.pdf]

ALPHABET= ACGT

>prsc1\_001.1

log-odds matrix: al length= 4 w= 13 n= 937 bayes= 7.54226 E= 9.7e+009

|      |      |      |      |
|------|------|------|------|
| -231 | 146  | 7    | -231 |
| -231 | 184  | -231 | -231 |
| 130  | -231 | -231 | -6   |
| -132 | 156  | -132 | -132 |
| -231 | 7    | -231 | 130  |
| 169  | -231 | -231 | -231 |
| -6   | 7    | -231 | 77   |
| -231 | -231 | 146  | -6   |
| -231 | 184  | -231 | -231 |
| -231 | -231 | -231 | 169  |
| -231 | 184  | -231 | -231 |
| 169  | -231 | -231 | -231 |
| -231 | 184  | -231 | -231 |

ALPHABET= ACGT

>prsc1\_001.2

log-odds matrix: al length= 4 w= 11 n= 947 bayes= 7.55766 E= 3.6e+010

|      |      |      |      |
|------|------|------|------|
| -231 | -231 | 184  | -231 |
| 130  | -231 | 7    | -231 |
| 169  | -231 | -231 | -231 |
| 77   | 7    | -231 | -6   |
| -132 | -132 | -132 | 141  |
| 169  | -231 | -231 | -231 |
| 169  | -231 | -231 | -231 |
| -6   | -231 | 146  | -231 |
| -231 | 184  | -231 | -231 |
| 130  | -231 | -231 | -6   |
| 169  | -231 | -231 | -231 |

ALPHABET= ACGT

>prsc1\_002.1

log-odds matrix: al length= 4 w= 30 n= 1416 bayes= 8.87958 E= 6.4e-001

|      |      |      |      |
|------|------|------|------|
| -823 | -823 | -823 | 182  |
| -823 | 219  | -823 | -823 |
| -823 | -823 | -823 | 182  |
| -823 | 161  | -823 | 24   |
| 182  | -823 | -823 | -823 |
| -823 | -823 | -823 | 182  |
| 124  | -823 | -823 | 24   |
| -823 | 219  | -823 | -823 |
| -823 | -823 | -823 | 182  |
| -823 | -823 | -823 | 182  |
| -823 | 61   | 61   | 24   |
| 24   | -823 | 161  | -823 |
| 182  | -823 | -823 | -823 |
| -823 | 219  | -823 | -823 |
| 124  | -823 | -823 | 24   |
| -823 | 61   | -823 | 124  |
| 182  | -823 | -823 | -823 |
| -823 | -823 | -823 | 182  |
| -823 | 219  | -823 | -823 |
| 182  | -823 | -823 | -823 |
| 182  | -823 | -823 | -823 |
| -823 | 219  | -823 | -823 |
| -823 | -823 | -823 | 182  |
| -823 | 61   | -823 | 124  |
| 182  | -823 | -823 | -823 |
| -823 | -823 | 219  | -823 |

74203Suppl emental \_CNSmatri ces. pssm. txt

|      |      |      |      |
|------|------|------|------|
| -823 | -823 | -823 | 182  |
| 182  | -823 | -823 | -823 |
| 182  | -823 | -823 | -823 |
| -823 | 219  | -823 | -823 |

ALPHABET= ACGT

>prsc1\_002. 2

log-odds matrix: alength= 4 w= 38 n= 1392 bayes= 8. 85487 E= 1. 8e+002

|      |      |      |      |
|------|------|------|------|
| 182  | -823 | -823 | -823 |
| -823 | 161  | 61   | -823 |
| -823 | -823 | -823 | 182  |
| -823 | -823 | -823 | 182  |
| -823 | 161  | -823 | 24   |
| -823 | 219  | -823 | -823 |
| 124  | -823 | -823 | 24   |
| -823 | 61   | 161  | -823 |
| 24   | -823 | 161  | -823 |
| 182  | -823 | -823 | -823 |
| 182  | -823 | -823 | -823 |
| -823 | 61   | 161  | -823 |
| -823 | -823 | -823 | 182  |
| 124  | -823 | 61   | -823 |
| -823 | 61   | 161  | -823 |
| 124  | -823 | 61   | -823 |
| 182  | -823 | -823 | -823 |
| 124  | -823 | -823 | 24   |
| 182  | -823 | -823 | -823 |
| -823 | -823 | 219  | -823 |
| 24   | 161  | -823 | -823 |
| 124  | -823 | -823 | 24   |
| -823 | -823 | 219  | -823 |
| 182  | -823 | -823 | -823 |
| -823 | -823 | -823 | 182  |
| -823 | -823 | -823 | 182  |
| -823 | -823 | 219  | -823 |
| 124  | -823 | 61   | -823 |
| -823 | -823 | -823 | 182  |
| -823 | 61   | -823 | 124  |
| 24   | 161  | -823 | -823 |
| 182  | -823 | -823 | -823 |
| -823 | 161  | -823 | 24   |
| -823 | 61   | -823 | 124  |
| -823 | 161  | -823 | 24   |
| -823 | -823 | -823 | 182  |
| 124  | -823 | 61   | -823 |
| -823 | -823 | -823 | 182  |

ALPHABET= ACGT

>prsc1\_002. 3

log-odds matrix: alength= 4 w= 17 n= 1455 bayes= 8. 91886 E= 2. 6e+005

|      |      |      |      |
|------|------|------|------|
| -823 | -823 | -823 | 182  |
| -823 | 219  | -823 | -823 |
| -823 | 61   | -823 | 124  |
| -823 | -823 | 61   | 124  |
| -823 | -823 | 161  | 24   |
| -823 | 219  | -823 | -823 |
| -823 | 219  | -823 | -823 |
| 124  | -823 | -823 | 24   |
| -823 | 219  | -823 | -823 |
| -823 | 61   | -823 | 124  |
| 182  | -823 | -823 | -823 |

74203Suppl emental \_CNSmatri ces. pssm. txt

|      |      |      |      |
|------|------|------|------|
| 124  | -823 | -823 | 24   |
| 24   | -823 | 161  | -823 |
| 24   | 161  | -823 | -823 |
| -823 | 61   | -823 | 124  |
| -823 | 219  | -823 | -823 |
| 182  | -823 | -823 | -823 |

ALPHABET= ACGT

>prsc1\_002. 4

log-odds matrix: alength= 4 w= 11 n= 1473 bayes= 8. 93664 E= 2. 7e+005

|      |      |      |      |
|------|------|------|------|
| -823 | -823 | -823 | 182  |
| -823 | -823 | -823 | 182  |
| -823 | 61   | 161  | -823 |
| 124  | -823 | -823 | 24   |
| -823 | -823 | -823 | 182  |
| 182  | -823 | -823 | -823 |
| -823 | -823 | -823 | 182  |
| 124  | 61   | -823 | -823 |
| -823 | -823 | -823 | 182  |
| -823 | -823 | -823 | 182  |
| -823 | -823 | 219  | -823 |

ALPHABET= ACGT

>prsc1\_002. 5

log-odds matrix: alength= 4 w= 14 n= 1464 bayes= 8. 92778 E= 6. 7e+005

|      |      |      |      |
|------|------|------|------|
| 182  | -823 | -823 | -823 |
| 24   | -823 | 161  | -823 |
| -823 | -823 | 219  | -823 |
| 24   | -823 | 61   | 24   |
| 182  | -823 | -823 | -823 |
| -823 | -823 | 61   | 124  |
| 124  | -823 | 61   | -823 |
| -823 | -823 | -823 | 182  |
| 24   | -823 | -823 | 124  |
| -823 | -823 | -823 | 182  |
| -823 | -823 | 61   | 124  |
| -823 | -823 | -823 | 182  |
| -823 | -823 | 219  | -823 |
| -823 | -823 | 219  | -823 |

ALPHABET= ACGT

>prsc1\_002. 6

log-odds matrix: alength= 4 w= 11 n= 1473 bayes= 8. 93664 E= 4. 4e+006

|      |      |      |      |
|------|------|------|------|
| -823 | 219  | -823 | -823 |
| 182  | -823 | -823 | -823 |
| 124  | -823 | 61   | -823 |
| 124  | 61   | -823 | -823 |
| 124  | -823 | -823 | 24   |
| 124  | -823 | 61   | -823 |
| -823 | -823 | 61   | 124  |
| -823 | -823 | -823 | 182  |
| -823 | 219  | -823 | -823 |
| -823 | 161  | -823 | 24   |
| -823 | 219  | -823 | -823 |

ALPHABET= ACGT

>prsc1\_002. 8

log-odds matrix: alength= 4 w= 11 n= 1473 bayes= 8. 93664 E= 5. 5e+006

|      |     |      |      |
|------|-----|------|------|
| -823 | 219 | -823 | -823 |
|------|-----|------|------|

74203Suppl emental \_CNSmatri ces. pssm. txt

|      |      |      |      |
|------|------|------|------|
| -823 | -823 | -823 | 182  |
| -823 | -823 | 161  | 24   |
| 24   | -823 | -823 | 124  |
| 24   | -823 | -823 | 124  |
| 24   | 61   | 61   | -823 |
| 24   | -823 | 161  | -823 |
| 124  | -823 | -823 | 24   |
| 182  | -823 | -823 | -823 |
| -823 | 219  | -823 | -823 |
| -823 | 219  | -823 | -823 |

ALPHABET= ACGT

>prsc1\_002. 9

log-odds matrix: alength= 4 w= 15 n= 1461 bayes= 8.92481 E= 4.3e+007

|      |      |      |      |
|------|------|------|------|
| 182  | -823 | -823 | -823 |
| 60   | -158 | -158 | 60   |
| 24   | 161  | -823 | -823 |
| -823 | -823 | -823 | 182  |
| 24   | 61   | -823 | 24   |
| 182  | -823 | -823 | -823 |
| 60   | 89   | -158 | -158 |
| -823 | 61   | -823 | 124  |
| -823 | -823 | -823 | 182  |
| -823 | 61   | 61   | 24   |
| -823 | 219  | -823 | -823 |
| 24   | -823 | -823 | 124  |
| -823 | 161  | -823 | 24   |
| 124  | 61   | -823 | -823 |
| -823 | -823 | -823 | 182  |

ALPHABET= ACGT

>prsc1\_003. 10

log-odds matrix: alength= 4 w= 11 n= 1011 bayes= 8.97871 E= 4.5e+004

|      |      |      |      |
|------|------|------|------|
| -765 | -765 | 233  | -765 |
| 73   | -765 | 133  | -765 |
| 172  | -765 | -765 | -765 |
| 172  | -765 | -765 | -765 |
| -765 | 233  | -765 | -765 |
| 73   | 133  | -765 | -765 |
| -765 | -765 | -765 | 172  |
| -765 | -765 | -765 | 172  |
| -765 | -765 | -765 | 172  |
| -765 | 233  | -765 | -765 |
| -765 | -765 | 233  | -765 |

ALPHABET= ACGT

>prsc1\_003. 1

log-odds matrix: alength= 4 w= 12 n= 1009 bayes= 8.97585 E= 1.0e+003

|      |      |      |      |
|------|------|------|------|
| -765 | 233  | -765 | -765 |
| -765 | 233  | -765 | -765 |
| 172  | -765 | -765 | -765 |
| -765 | -765 | -765 | 172  |
| -765 | -765 | 233  | -765 |
| -765 | 233  | -765 | -765 |
| 172  | -765 | -765 | -765 |
| -765 | -765 | 233  | -765 |
| -765 | -765 | 233  | -765 |
| 172  | -765 | -765 | -765 |
| -765 | 233  | -765 | -765 |
| -765 | 233  | -765 | -765 |

ALPHABET= ACGT

>prsc1\_003. 2

log-odds matrix: alength= 4 w= 40 n= 953 bayes= 8. 8933 E= 2. 0e+003

|      |      |      |      |
|------|------|------|------|
| -765 | -765 | 233  | -765 |
| -765 | -765 | -765 | 172  |
| -765 | -765 | 233  | -765 |
| -765 | -765 | 233  | -765 |
| 73   | -765 | 133  | -765 |
| -765 | 133  | 133  | -765 |
| -765 | 233  | -765 | -765 |
| 172  | -765 | -765 | -765 |
| -765 | 233  | -765 | -765 |
| -765 | -765 | -765 | 172  |
| 172  | -765 | -765 | -765 |
| 73   | -765 | 133  | -765 |
| -765 | 233  | -765 | -765 |
| 73   | -765 | -765 | 73   |
| 172  | -765 | -765 | -765 |
| -765 | 133  | 133  | -765 |
| -765 | -765 | -765 | 172  |
| 172  | -765 | -765 | -765 |
| -765 | 133  | -765 | 73   |
| 172  | -765 | -765 | -765 |
| -765 | 133  | -765 | 73   |
| -765 | -765 | -765 | 172  |
| -765 | -765 | -765 | 172  |
| 172  | -765 | -765 | -765 |
| 172  | -765 | -765 | -765 |
| -765 | 233  | -765 | -765 |
| 172  | -765 | -765 | -765 |
| 73   | -765 | 133  | -765 |
| -765 | -765 | 233  | -765 |
| -765 | 233  | -765 | -765 |
| 172  | -765 | -765 | -765 |
| -765 | 233  | -765 | -765 |
| 172  | -765 | -765 | -765 |
| -765 | -765 | -765 | 172  |
| -765 | -765 | 233  | -765 |
| -765 | 133  | -765 | 73   |
| -765 | -765 | 233  | -765 |
| 172  | -765 | -765 | -765 |
| -765 | 233  | -765 | -765 |
| -765 | -765 | -765 | 172  |

ALPHABET= ACGT

>prsc1\_003. 3

log-odds matrix: alength= 4 w= 11 n= 1011 bayes= 8. 97871 E= 7. 3e+003

|      |      |      |      |
|------|------|------|------|
| -765 | -765 | 233  | -765 |
| -765 | -765 | -765 | 172  |
| -765 | -765 | -765 | 172  |
| -765 | -765 | 233  | -765 |
| -765 | 233  | -765 | -765 |
| 172  | -765 | -765 | -765 |
| -765 | 233  | -765 | -765 |
| -765 | 133  | -765 | 73   |
| -765 | 233  | -765 | -765 |
| 172  | -765 | -765 | -765 |
| -765 | 233  | -765 | -765 |

ALPHABET= ACGT

&gt;prsc1\_003.5

log-odds matrix: alength= 4 w= 16 n= 1001 bayes= 8.96434 E= 1.4e+004

|      |      |      |      |
|------|------|------|------|
| -765 | 233  | -765 | -765 |
| -765 | 233  | -765 | -765 |
| 172  | -765 | -765 | -765 |
| -765 | 133  | 133  | -765 |
| -765 | 233  | -765 | -765 |
| -765 | -765 | -765 | 172  |
| 172  | -765 | -765 | -765 |
| 73   | 133  | -765 | -765 |
| 172  | -765 | -765 | -765 |
| -765 | -765 | 233  | -765 |
| -765 | 233  | -765 | -765 |
| 172  | -765 | -765 | -765 |
| -765 | -765 | -765 | 172  |
| 73   | -765 | 133  | -765 |
| 172  | -765 | -765 | -765 |
| -765 | -765 | 233  | -765 |

ALPHABET= ACGT

&gt;prsc1\_003.9

log-odds matrix: alength= 4 w= 20 n= 993 bayes= 8.95274 E= 3.0e+004

|      |      |      |      |
|------|------|------|------|
| 172  | -765 | -765 | -765 |
| 172  | -765 | -765 | -765 |
| -765 | -765 | -765 | 172  |
| 172  | -765 | -765 | -765 |
| 172  | -765 | -765 | -765 |
| -765 | -765 | 233  | -765 |
| -765 | 233  | -765 | -765 |
| 172  | -765 | -765 | -765 |
| 73   | 133  | -765 | -765 |
| 172  | -765 | -765 | -765 |
| -765 | -765 | 133  | 73   |
| -765 | 233  | -765 | -765 |
| -765 | 233  | -765 | -765 |
| 172  | -765 | -765 | -765 |
| 73   | -765 | -765 | 73   |
| -765 | -765 | 233  | -765 |
| -765 | -765 | -765 | 172  |
| 172  | -765 | -765 | -765 |
| 172  | -765 | -765 | -765 |
| 172  | -765 | -765 | -765 |

ALPHABET= ACGT

&gt;prsc1\_004.1

log-odds matrix: alength= 4 w= 28 n= 917 bayes= 7.83447 E= 1.7e+004

|      |      |      |      |
|------|------|------|------|
| -865 | -865 | 18   | 142  |
| 183  | -865 | -865 | -865 |
| 183  | -865 | -865 | -865 |
| -16  | -865 | 177  | -865 |
| -16  | 18   | -865 | 83   |
| -865 | -865 | 177  | -16  |
| -16  | 18   | 118  | -865 |
| -16  | 177  | -865 | -865 |
| -199 | 187  | -199 | -199 |
| -865 | -865 | -865 | 183  |
| -16  | -865 | -865 | 142  |
| -865 | 177  | 18   | -865 |
| 183  | -865 | -865 | -865 |
| 102  | -199 | -199 | 19   |

74203Suppl emental \_CNSmatri ces. pssm. txt

|      |      |      |      |
|------|------|------|------|
| 83   | -865 | 18   | -16  |
| -16  | -865 | 177  | -865 |
| 142  | 18   | -865 | -865 |
| -865 | 218  | -865 | -865 |
| 83   | 118  | -865 | -865 |
| -199 | -199 | -199 | 155  |
| -199 | -199 | 187  | -199 |
| -16  | -865 | -865 | 142  |
| -865 | -865 | 118  | 83   |
| -865 | 118  | 118  | -865 |
| 142  | -865 | 18   | -865 |
| 183  | -865 | -865 | -865 |
| -16  | 118  | 18   | -865 |
| -865 | -865 | -865 | 183  |

ALPHABET= ACGT

>prsc1\_004. 3

log-odds matrix: alength= 4 w= 11 n= 985 bayes= 7. 93811 E= 4. 8e+009

|      |      |      |      |
|------|------|------|------|
| -865 | 18   | 177  | -865 |
| -16  | -865 | -865 | 142  |
| 142  | 18   | -865 | -865 |
| 19   | 133  | -199 | -199 |
| -199 | 187  | -199 | -199 |
| -199 | -199 | -199 | 155  |
| -199 | -199 | 47   | 102  |
| 19   | -199 | 133  | -199 |
| -199 | -199 | -199 | 155  |
| -199 | -199 | 187  | -199 |
| -199 | 187  | -199 | -199 |

ALPHABET= ACGT

>prsc1\_005. 10

log-odds matrix: alength= 4 w= 10 n= 1574 bayes= 9. 0325 E= 6. 3e+004

|      |      |      |      |
|------|------|------|------|
| -823 | 234  | -823 | -823 |
| 172  | -823 | -823 | -823 |
| 172  | -823 | -823 | -823 |
| -823 | 234  | -823 | -823 |
| 172  | -823 | -823 | -823 |
| -823 | 75   | 175  | -823 |
| 114  | -823 | -823 | 14   |
| 172  | -823 | -823 | -823 |
| 14   | 175  | -823 | -823 |
| -823 | 234  | -823 | -823 |

ALPHABET= ACGT

>prsc1\_005. 1

log-odds matrix: alength= 4 w= 26 n= 1526 bayes= 8. 98774 E= 9. 6e-001

|      |      |      |      |
|------|------|------|------|
| 172  | -823 | -823 | -823 |
| -823 | -823 | -823 | 172  |
| 172  | -823 | -823 | -823 |
| 172  | -823 | -823 | -823 |
| -823 | -823 | -823 | 172  |
| -823 | -823 | -823 | 172  |
| 172  | -823 | -823 | -823 |
| -823 | 75   | -823 | 114  |
| 14   | 175  | -823 | -823 |
| 172  | -823 | -823 | -823 |
| -823 | -823 | -823 | 172  |
| 114  | -823 | 75   | -823 |
| 14   | -823 | -823 | 114  |

74203Suppl emental \_CNSmatri ces. pssm. txt

```

-823 234 -823 -823
-823 175 -823 14
172 -823 -823 -823
-823 -823 -823 172
-823 -823 234 -823
-823 234 -823 -823
172 -823 -823 -823
-823 -823 234 -823
-823 -823 234 -823
114 -823 75 -823
-823 234 -823 -823
-823 234 -823 -823
172 -823 -823 -823

```

ALPHABET= ACGT

>prsc1\_005. 2

log-odds matrix: al ength= 4 w= 44 n= 1472 bayes= 8. 93566 E= 1. 4e+000

```

-823 -823 -823 172
-823 -823 -823 172
-823 -823 -823 172
-823 75 -823 114
-823 75 -823 114
114 -823 -823 14
14 -823 175 -823
-823 -823 234 -823
-823 -823 -823 172
-823 -823 234 -823
-823 -823 234 -823
14 75 75 -823
14 75 75 -823
-823 234 -823 -823
172 -823 -823 -823
-823 234 -823 -823
-823 -823 -823 172
172 -823 -823 -823
114 -823 75 -823
-823 234 -823 -823
14 -823 -823 114
114 -823 75 -823
-823 75 75 14
-823 -823 -823 172
172 -823 -823 -823
-823 175 -823 14
172 -823 -823 -823
-823 175 -823 14
-823 -823 -823 172
-823 -823 -823 172
172 -823 -823 -823
172 -823 -823 -823
-823 234 -823 -823
172 -823 -823 -823
14 75 75 -823
14 -823 175 -823
14 175 -823 -823
114 -823 75 -823
-823 234 -823 -823
172 -823 -823 -823
-823 75 -823 114
14 -823 175 -823
-823 75 -823 114
-823 -823 234 -823

```



ALPHABET= ACGT

&gt;prsc1\_005. 3

log-odds matrix: alength= 4 w= 14 n= 1562 bayes= 9. 02144 E= 2. 3e+001

|      |      |      |      |
|------|------|------|------|
| 172  | -823 | -823 | -823 |
| 172  | -823 | -823 | -823 |
| 172  | -823 | -823 | -823 |
| -823 | -823 | 234  | -823 |
| -823 | -823 | -823 | 172  |
| -823 | -823 | -823 | 172  |
| -823 | -823 | 234  | -823 |
| -823 | 234  | -823 | -823 |
| 172  | -823 | -823 | -823 |
| -823 | 234  | -823 | -823 |
| -823 | 175  | -823 | 14   |
| -823 | 234  | -823 | -823 |
| 172  | -823 | -823 | -823 |
| -823 | 234  | -823 | -823 |

ALPHABET= ACGT

&gt;prsc1\_005. 4

log-odds matrix: alength= 4 w= 23 n= 1535 bayes= 8. 99624 E= 4. 4e+001

|      |      |      |      |
|------|------|------|------|
| -823 | -823 | -823 | 172  |
| 14   | 175  | -823 | -823 |
| 14   | -823 | 175  | -823 |
| 172  | -823 | -823 | -823 |
| 172  | -823 | -823 | -823 |
| -823 | -823 | -823 | 172  |
| 172  | -823 | -823 | -823 |
| 172  | -823 | -823 | -823 |
| -823 | -823 | 234  | -823 |
| -823 | 175  | -823 | 14   |
| 172  | -823 | -823 | -823 |
| 14   | 175  | -823 | -823 |
| 172  | -823 | -823 | -823 |
| -823 | -823 | 175  | 14   |
| -823 | 234  | -823 | -823 |
| -823 | 234  | -823 | -823 |
| 172  | -823 | -823 | -823 |
| 14   | -823 | -823 | 114  |
| -823 | -823 | 234  | -823 |
| -823 | -823 | -823 | 172  |
| 172  | -823 | -823 | -823 |
| 172  | -823 | -823 | -823 |
| 172  | -823 | -823 | -823 |

ALPHABET= ACGT

&gt;prsc1\_005. 5

log-odds matrix: alength= 4 w= 30 n= 1514 bayes= 8. 97633 E= 4. 0e+001

|      |      |      |      |
|------|------|------|------|
| -823 | -823 | -823 | 172  |
| 172  | -823 | -823 | -823 |
| 114  | -823 | 75   | -823 |
| 172  | -823 | -823 | -823 |
| -823 | -823 | 234  | -823 |
| 172  | -823 | -823 | -823 |
| -823 | -823 | -823 | 172  |
| -823 | -823 | -823 | 172  |
| 172  | -823 | -823 | -823 |
| -823 | -823 | -823 | 172  |
| 14   | -823 | 175  | -823 |
| -823 | 75   | 75   | 14   |

74203Suppl emental \_CNSmatri ces. pssm. txt

|      |      |      |      |
|------|------|------|------|
| -158 | -158 | -158 | 134  |
| -158 | -158 | 189  | -158 |
| -158 | -158 | -158 | 134  |
| -823 | -823 | 175  | 14   |
| -823 | 75   | -823 | 114  |
| -158 | -158 | -158 | 134  |
| -823 | 234  | -823 | -823 |
| -823 | 234  | -823 | -823 |
| 172  | -823 | -823 | -823 |
| -823 | 75   | 175  | -823 |
| -823 | 234  | -823 | -823 |
| -823 | -823 | -823 | 172  |
| 172  | -823 | -823 | -823 |
| 14   | 175  | -823 | -823 |
| 172  | -823 | -823 | -823 |
| -823 | -823 | 234  | -823 |
| -823 | 234  | -823 | -823 |
| 172  | -823 | -823 | -823 |

ALPHABET= ACGT

>prsc1\_005. 6

log-odds matrix: alength= 4 w= 15 n= 1559 bayes= 9. 01866 E= 5. 8e+002

|      |      |      |      |
|------|------|------|------|
| -823 | 234  | -823 | -823 |
| -823 | -823 | -823 | 172  |
| -823 | -823 | 75   | 114  |
| -823 | 175  | -823 | 14   |
| 172  | -823 | -823 | -823 |
| 14   | -823 | -823 | 114  |
| -823 | 234  | -823 | -823 |
| 172  | -823 | -823 | -823 |
| -823 | -823 | 234  | -823 |
| -823 | 234  | -823 | -823 |
| -823 | -823 | -823 | 172  |
| 172  | -823 | -823 | -823 |
| 172  | -823 | -823 | -823 |
| -823 | 234  | -823 | -823 |
| 172  | -823 | -823 | -823 |

ALPHABET= ACGT

>prsc1\_005. 7

log-odds matrix: alength= 4 w= 13 n= 1565 bayes= 9. 02422 E= 6. 4e+002

|      |      |      |      |
|------|------|------|------|
| -823 | -823 | -823 | 172  |
| 172  | -823 | -823 | -823 |
| -823 | 234  | -823 | -823 |
| -823 | -823 | -823 | 172  |
| -823 | -823 | -823 | 172  |
| -823 | 234  | -823 | -823 |
| -823 | 234  | -823 | -823 |
| 172  | -823 | -823 | -823 |
| -823 | 175  | -823 | 14   |
| 172  | -823 | -823 | -823 |
| 14   | -823 | -823 | 114  |
| -823 | -823 | 234  | -823 |
| -823 | -823 | 234  | -823 |

ALPHABET= ACGT

>prsc1\_005. 8

log-odds matrix: alength= 4 w= 12 n= 1568 bayes= 9. 02698 E= 2. 1e+003

|      |      |      |      |
|------|------|------|------|
| 172  | -823 | -823 | -823 |
| -823 | 75   | 175  | -823 |

74203Suppl emental \_CNSmatri ces. pssm. txt

```
-823 234 -823 -823
 14 175 -823 -823
-823 -823 -823 172
-823 75 75 14
-823 234 -823 -823
-823 -823 -823 172
-823 -823 234 -823
-823 -823 234 -823
 172 -823 -823 -823
-823 234 -823 -823
```

ALPHABET= ACGT

>prsc1\_005. 9

log-odds matrix: alength= 4 w= 21 n= 1541 bayes= 9. 00188 E= 4. 0e+004

```
-823 175 75 -823
-823 234 -823 -823
-823 175 -823 14
-823 -823 -823 172
-823 175 -823 14
 172 -823 -823 -823
 172 -823 -823 -823
 172 -823 -823 -823
 14 175 -823 -823
 14 -823 -823 114
 172 -823 -823 -823
 14 -823 -823 114
-823 -823 75 114
 172 -823 -823 -823
 14 -823 175 -823
-823 234 -823 -823
 114 -823 -823 14
-823 -823 75 114
-823 234 -823 -823
 172 -823 -823 -823
 172 -823 -823 -823
```

ALPHABET= ACGT

>prsc1\_006. 1

log-odds matrix: alength= 4 w= 35 n= 766 bayes= 7. 57365 E= 4. 4e-002

```
-865 -865 13 146
-865 -865 -865 188
-865 213 -865 -865
-865 -865 -865 188
-199 -199 182 -199
 -12 171 -865 -865
-199 42 -199 106
 -12 171 -865 -865
-865 213 -865 -865
 188 -865 -865 -865
 -12 -865 171 -865
 188 -865 -865 -865
 188 -865 -865 -865
-865 -865 -865 188
-865 -865 -865 188
-865 -865 -865 188
 -12 -865 113 -12
-865 213 -865 -865
-865 -865 -865 188
-865 13 -865 146
 88 -865 13 -12
 88 -865 113 -865
```

74203Suppl emental \_CNSmatri ces. pssm. txt

|      |      |      |      |
|------|------|------|------|
| -12  | -865 | -865 | 146  |
| 188  | -865 | -865 | -865 |
| -865 | 113  | 113  | -865 |
| 146  | -865 | -865 | -12  |
| -865 | -865 | 171  | -12  |
| -865 | 113  | -865 | 88   |
| -12  | 13   | 113  | -865 |
| 188  | -865 | -865 | -865 |
| 146  | -865 | -865 | -12  |
| -865 | 13   | -865 | 146  |
| 88   | -865 | 13   | -12  |
| 23   | -199 | 128  | -199 |
| -865 | -865 | -865 | 188  |

ALPHABET= ACGT

>prsc10\_065. 1

log-odds matrix: al ength= 4 w= 13 n= 992 bayes= 8. 95128 E= 1. 2e+004

|      |      |      |      |
|------|------|------|------|
| -765 | 234  | -765 | -765 |
| -765 | -765 | 234  | -765 |
| 72   | 134  | -765 | -765 |
| -765 | -765 | -765 | 172  |
| -765 | -765 | 234  | -765 |
| 72   | 134  | -765 | -765 |
| -765 | -765 | -765 | 172  |
| -765 | -765 | 234  | -765 |
| -765 | -765 | -765 | 172  |
| -765 | -765 | -765 | 172  |
| -765 | -765 | 234  | -765 |
| -765 | -765 | -765 | 172  |
| -765 | 234  | -765 | -765 |

ALPHABET= ACGT

>prsc10\_065. 3

log-odds matrix: al ength= 4 w= 11 n= 996 bayes= 8. 9571 E= 2. 4e+004

|      |      |      |      |
|------|------|------|------|
| -765 | -765 | -765 | 172  |
| -765 | -765 | -765 | 172  |
| -765 | 234  | -765 | -765 |
| 172  | -765 | -765 | -765 |
| -765 | -765 | -765 | 172  |
| -765 | -765 | 234  | -765 |
| -765 | -765 | 234  | -765 |
| -765 | -765 | -765 | 172  |
| -765 | -765 | 134  | 72   |
| -765 | -765 | -765 | 172  |
| -765 | 234  | -765 | -765 |

ALPHABET= ACGT

>prsc10\_065. 5

log-odds matrix: al ength= 4 w= 13 n= 992 bayes= 8. 95128 E= 2. 8e+004

|      |      |      |      |
|------|------|------|------|
| 172  | -765 | -765 | -765 |
| -765 | -765 | 234  | -765 |
| -765 | -765 | -765 | 172  |
| -765 | 234  | -765 | -765 |
| -765 | -765 | -765 | 172  |
| -765 | -765 | -765 | 172  |
| -765 | -765 | 234  | -765 |
| -765 | 134  | 134  | -765 |
| -765 | -765 | -765 | 172  |
| 72   | 134  | -765 | -765 |
| -765 | 134  | 134  | -765 |

|      |      |      |      |
|------|------|------|------|
| 172  | -765 | -765 | -765 |
| -765 | -765 | 234  | -765 |

ALPHABET= ACGT

&gt;prsc10\_065. 6

log-odds matrix: alength= 4 w= 12 n= 994 bayes= 8. 9542 E= 3. 9e+004

|      |      |      |      |
|------|------|------|------|
| -765 | -765 | -765 | 172  |
| -765 | -765 | -765 | 172  |
| -765 | -765 | 234  | -765 |
| -765 | -765 | -765 | 172  |
| -765 | -765 | 134  | 72   |
| 72   | 134  | -765 | -765 |
| -765 | -765 | -765 | 172  |
| 172  | -765 | -765 | -765 |
| -765 | 234  | -765 | -765 |
| -765 | -765 | -765 | 172  |
| -765 | 234  | -765 | -765 |
| -765 | -765 | 234  | -765 |

ALPHABET= ACGT

&gt;prsc10\_065. 9

log-odds matrix: alength= 4 w= 14 n= 990 bayes= 8. 94837 E= 7. 3e+004

|      |      |      |      |
|------|------|------|------|
| -765 | -765 | -765 | 172  |
| 172  | -765 | -765 | -765 |
| -765 | 234  | -765 | -765 |
| -99  | -99  | -99  | 110  |
| 172  | -765 | -765 | -765 |
| -765 | -765 | -765 | 172  |
| -765 | -765 | 234  | -765 |
| -765 | 134  | 134  | -765 |
| -765 | -765 | -765 | 172  |
| -765 | -765 | 134  | 72   |
| -765 | -765 | -765 | 172  |
| -765 | -765 | -765 | 172  |
| -765 | 234  | -765 | -765 |
| 172  | -765 | -765 | -765 |

ALPHABET= ACGT

&gt;prsc10\_066. 1

log-odds matrix: alength= 4 w= 10 n= 1093 bayes= 8. 50515 E= 1. 1e+003

|      |      |      |      |
|------|------|------|------|
| 177  | -823 | -823 | -823 |
| 177  | -823 | -823 | -823 |
| -823 | -823 | 226  | -823 |
| 119  | -823 | -823 | 19   |
| -823 | -823 | 226  | -823 |
| -823 | 226  | -823 | -823 |
| 177  | -823 | -823 | -823 |
| 177  | -823 | -823 | -823 |
| -823 | 226  | -823 | -823 |
| -823 | 226  | -823 | -823 |

ALPHABET= ACGT

&gt;prsc10\_066. 2

log-odds matrix: alength= 4 w= 27 n= 1042 bayes= 8. 43602 E= 2. 5e+003

|      |      |      |      |
|------|------|------|------|
| 177  | -823 | -823 | -823 |
| -823 | -823 | -823 | 177  |
| -823 | -823 | -823 | 177  |
| -823 | -823 | 226  | -823 |
| 19   | -823 | 168  | -823 |

74203Suppl emental \_CNSmatri ces. pssm. txt

|      |      |      |      |
|------|------|------|------|
| 177  | -823 | -823 | -823 |
| 177  | -823 | -823 | -823 |
| 119  | -823 | -823 | 19   |
| -823 | -823 | -823 | 177  |
| 119  | -823 | -823 | 19   |
| -823 | 168  | -823 | 19   |
| 19   | -823 | 68   | 19   |
| 119  | -823 | 68   | -823 |
| 19   | -823 | 168  | -823 |
| 177  | -823 | -823 | -823 |
| 177  | -823 | -823 | -823 |
| 177  | -823 | -823 | -823 |
| -823 | -823 | -823 | 177  |
| -823 | 68   | -823 | 119  |
| -823 | -823 | 226  | -823 |
| 177  | -823 | -823 | -823 |
| 19   | 68   | 68   | -823 |
| 177  | -823 | -823 | -823 |
| 177  | -823 | -823 | -823 |
| -823 | -823 | 68   | 119  |
| -823 | -823 | -823 | 177  |
| 177  | -823 | -823 | -823 |

ALPHABET= ACGT

>prsc10\_066. 3

log-odds matrix: al length= 4 w= 31 n= 1030 bayes= 8. 41926 E= 2. 6e+003

|      |      |      |      |
|------|------|------|------|
| 177  | -823 | -823 | -823 |
| 177  | -823 | -823 | -823 |
| 19   | -823 | -823 | 119  |
| 177  | -823 | -823 | -823 |
| -823 | -823 | 226  | -823 |
| 19   | 168  | -823 | -823 |
| 177  | -823 | -823 | -823 |
| 119  | -823 | -823 | 19   |
| 19   | 168  | -823 | -823 |
| 177  | -823 | -823 | -823 |
| -823 | -823 | -823 | 177  |
| 119  | 68   | -823 | -823 |
| 19   | -823 | -823 | 119  |
| 177  | -823 | -823 | -823 |
| -823 | 68   | -823 | 119  |
| 177  | -823 | -823 | -823 |
| -823 | -823 | 168  | 19   |
| 177  | -823 | -823 | -823 |
| -823 | 168  | -823 | 19   |
| -823 | -823 | -823 | 177  |
| 119  | -823 | 68   | -823 |
| 119  | -823 | -823 | 19   |
| 19   | -823 | -823 | 119  |
| 19   | -823 | -823 | 119  |
| -823 | -823 | 226  | -823 |
| -823 | -823 | 68   | 119  |
| 19   | -823 | -823 | 119  |
| -823 | 226  | -823 | -823 |
| -823 | 226  | -823 | -823 |
| 177  | -823 | -823 | -823 |
| -823 | -823 | 226  | -823 |

ALPHABET= ACGT

>prsc10\_066. 4

log-odds matrix: al length= 4 w= 13 n= 1084 bayes= 8. 49319 E= 1. 7e+004

74203Suppl emental \_CNSmatri ces. pssm. txt

```
-823 226 -823 -823
119 -823 -823 19
-823 -823 -823 168
-823 226 -823 -823
177 -823 -823 -823
-823 68 -823 119
-823 226 -823 -823
-823 226 -823 -823
177 -823 -823 -823
119 68 -823 -823
119 -823 68 -823
-823 -823 226 -823
177 -823 -823 -823
```

ALPHABET= ACGT

>prsc10\_066. 5

log-odds matrix: alength= 4 w= 11 n= 1090 bayes= 8. 50117 E= 7. 7e+004

```
177 -823 -823 -823
177 -823 -823 -823
19 -823 -823 168
-823 -823 226 -823
119 68 -823 -823
-823 -823 -823 177
19 -823 -823 119
-823 226 -823 -823
177 -823 -823 -823
-823 -823 -823 177
177 -823 -823 -823
```

ALPHABET= ACGT

>prsc10\_066. 6

log-odds matrix: alength= 4 w= 15 n= 1078 bayes= 8. 48516 E= 4. 8e+005

```
177 -823 -823 -823
19 -823 -823 119
19 -823 168 -823
177 -823 -823 -823
56 -158 -158 56
-823 -823 -823 177
-823 -823 -823 177
177 -823 -823 -823
-823 -823 -823 177
-823 -823 -823 177
177 -823 -823 -823
-823 168 -823 19
19 168 -823 -823
119 68 -823 -823
177 -823 -823 -823
```

ALPHABET= ACGT

>prsc10\_066. 7

log-odds matrix: alength= 4 w= 10 n= 1093 bayes= 8. 50515 E= 1. 5e+008

```
-823 -823 -823 177
-823 -823 -823 177
-823 168 68 -823
-158 182 -158 -158
138 -158 -158 -158
138 -158 -158 -158
-158 -158 -158 138
-158 182 -158 -158
138 -158 -158 -158
```

-158 -158 182

-158

ALPHABET= ACGT

&gt;prsc10\_069.10

log-odds matrix: alength= 4 w= 11 n= 1481 bayes= 8.94447 E= 1.0e+006

|      |      |      |      |
|------|------|------|------|
| -823 | -823 | -823 | 176  |
| -823 | 228  | -823 | -823 |
| 118  | -823 | -823 | 18   |
| -823 | -823 | -823 | 176  |
| -823 | -823 | 70   | 118  |
| -823 | -823 | -823 | 176  |
| -823 | -823 | -823 | 176  |
| 18   | 70   | -823 | 18   |
| -823 | -823 | -823 | 176  |
| -823 | 169  | -823 | 18   |
| -823 | 228  | -823 | -823 |

ALPHABET= ACGT

&gt;prsc10\_069.1

log-odds matrix: alength= 4 w= 19 n= 1457 bayes= 8.92085 E= 2.0e+003

|      |      |      |      |
|------|------|------|------|
| -823 | -823 | -823 | 176  |
| -823 | -823 | 228  | -823 |
| 176  | -823 | -823 | -823 |
| -823 | -823 | 70   | 118  |
| -823 | -823 | 228  | -823 |
| -823 | -823 | 228  | -823 |
| -823 | 169  | -823 | 18   |
| 118  | 70   | -823 | -823 |
| 176  | -823 | -823 | -823 |
| 176  | -823 | -823 | -823 |
| 176  | -823 | -823 | -823 |
| -823 | 228  | -823 | -823 |
| 18   | 70   | -823 | 18   |
| 176  | -823 | -823 | -823 |
| 118  | -823 | 70   | -823 |
| 176  | -823 | -823 | -823 |
| -823 | 228  | -823 | -823 |
| 118  | 70   | -823 | -823 |
| 176  | -823 | -823 | -823 |

ALPHABET= ACGT

&gt;prsc10\_069.3

log-odds matrix: alength= 4 w= 11 n= 1481 bayes= 8.94447 E= 4.6e+004

|      |      |      |      |
|------|------|------|------|
| -823 | -823 | -823 | 176  |
| -823 | -823 | 228  | -823 |
| -823 | -823 | -823 | 176  |
| -823 | 169  | 70   | -823 |
| -823 | -823 | -823 | 176  |
| 118  | -823 | -823 | 18   |
| -823 | 169  | 70   | -823 |
| -823 | 228  | -823 | -823 |
| -823 | -823 | -823 | 176  |
| -823 | -823 | -823 | 176  |
| 176  | -823 | -823 | -823 |

ALPHABET= ACGT

&gt;prsc10\_069.7

log-odds matrix: alength= 4 w= 16 n= 1466 bayes= 8.92975 E= 3.2e+005

|      |     |      |      |
|------|-----|------|------|
| -823 | 228 | -823 | -823 |
|------|-----|------|------|



74203Suppl emental \_CNSmatri ces. pssm. txt

```

-823 -823 -823 176
 18 -823 -823 118
 18 -823 -823 118
 18 -823 -823 118
 176 -823 -823 -823
-823 -823 -823 176
-823 228 -823 -823
 176 -823 -823 -823
 176 -823 -823 -823
 118 70 -823 -823
 176 -823 -823 -823
-823 -823 70 118
 176 -823 -823 -823
 118 70 -823 -823
-823 -823 -823 176

```

ALPHABET= ACGT

>prsc10\_069. 8

log-odds matrix: alength= 4 w= 11 n= 1481 bayes= 8.94447 E= 3.8e+005

```

 176 -823 -823 -823
-823 -823 228 -823
-823 70 70 18
-823 -823 -823 176
-823 70 169 -823
 176 -823 -823 -823
 18 -823 169 -823
-823 -823 -823 176
-823 -823 -823 176
 18 -823 -823 118
-823 228 -823 -823

```

ALPHABET= ACGT

>prsc10\_069. 9

log-odds matrix: alength= 4 w= 13 n= 1475 bayes= 8.9386 E= 5.7e+005

```

-823 228 -823 -823
 18 -823 70 18
 18 169 -823 -823
 176 -823 -823 -823
 176 -823 -823 -823
 118 70 -823 -823
 18 70 70 -823
 176 -823 -823 -823
 176 -823 -823 -823
 176 -823 -823 -823
-158 -158 97 55
-823 -823 228 -823
-823 -823 228 -823

```

ALPHABET= ACGT

>prsc10\_070. 10

log-odds matrix: alength= 4 w= 12 n= 1589 bayes= 9.04621 E= 4.0e+005

```

 177 -823 -823 -823
 177 -823 -823 -823
-823 68 -823 119
 177 -823 -823 -823
 177 -823 -823 -823
-823 -823 226 -823
-823 226 -823 -823
 119 -823 68 -823
 119 -823 -823 19

```

74203Suppl emental \_CNSmatri ces. pssm. txt

|      |      |      |      |
|------|------|------|------|
| 19   | -823 | 168  | -823 |
| 177  | -823 | -823 | -823 |
| -823 | -823 | -823 | 177  |

ALPHABET= ACGT

>prsc10\_070. 1

log-odds matri x: al ength= 4 w= 11 n= 1592 bayes= 9. 04894 E= 6. 1e+003

|      |      |      |      |
|------|------|------|------|
| 177  | -823 | -823 | -823 |
| -823 | -823 | 226  | -823 |
| -823 | -823 | 226  | -823 |
| 177  | -823 | -823 | -823 |
| -823 | -823 | 226  | -823 |
| -823 | -823 | 226  | -823 |
| -823 | -823 | 168  | 19   |
| 177  | -823 | -823 | -823 |
| -823 | -823 | -823 | 177  |
| -823 | 168  | -823 | 19   |
| 177  | -823 | -823 | -823 |

ALPHABET= ACGT

>prsc10\_070. 2

log-odds matri x: al ength= 4 w= 10 n= 1595 bayes= 9. 05166 E= 4. 8e+004

|      |      |      |      |
|------|------|------|------|
| -823 | -823 | 226  | -823 |
| 119  | 68   | -823 | -823 |
| -823 | 168  | -823 | 19   |
| 177  | -823 | -823 | -823 |
| -823 | 226  | -823 | -823 |
| 177  | -823 | -823 | -823 |
| 177  | -823 | -823 | -823 |
| -823 | -823 | -823 | 177  |
| -823 | 226  | -823 | -823 |
| 177  | -823 | -823 | -823 |

ALPHABET= ACGT

>prsc10\_070. 3

log-odds matri x: al ength= 4 w= 13 n= 1586 bayes= 9. 04348 E= 6. 0e+004

|      |      |      |      |
|------|------|------|------|
| 177  | -823 | -823 | -823 |
| 177  | -823 | -823 | -823 |
| -823 | -823 | 226  | -823 |
| -823 | 68   | 168  | -823 |
| 177  | -823 | -823 | -823 |
| -823 | 226  | -823 | -823 |
| 19   | -823 | -823 | 119  |
| -823 | -823 | 168  | 19   |
| -823 | 68   | 168  | -823 |
| -823 | 226  | -823 | -823 |
| 119  | -823 | -823 | 19   |
| -823 | 168  | -823 | 19   |
| -823 | 226  | -823 | -823 |

ALPHABET= ACGT

>prsc10\_070. 5

log-odds matri x: al ength= 4 w= 10 n= 1595 bayes= 9. 05166 E= 1. 3e+005

|      |      |      |      |
|------|------|------|------|
| -823 | 226  | -823 | -823 |
| 177  | -823 | -823 | -823 |
| -823 | -823 | 226  | -823 |
| 119  | -823 | -823 | 19   |
| 119  | 68   | -823 | -823 |
| 119  | 68   | -823 | -823 |

74203Suppl emental \_CNSmatri ces. pssm. txt

|      |      |      |      |
|------|------|------|------|
| -823 | 226  | -823 | -823 |
| -823 | 226  | -823 | -823 |
| 177  | -823 | -823 | -823 |
| 177  | -823 | -823 | -823 |

ALPHABET= ACGT

>prsc10\_070. 6

log-odds matrix: alength= 4 w= 13 n= 1586 bayes= 9.04348 E= 1.1e+005

|      |      |      |      |
|------|------|------|------|
| -823 | -823 | -823 | 177  |
| -823 | -823 | 226  | -823 |
| -823 | -823 | -823 | 177  |
| -823 | -823 | 226  | -823 |
| -823 | -823 | 68   | 119  |
| -823 | -823 | 226  | -823 |
| 19   | 168  | -823 | -823 |
| -823 | 168  | -823 | 19   |
| 119  | 68   | -823 | -823 |
| 19   | 68   | -823 | 19   |
| 177  | -823 | -823 | -823 |
| 177  | -823 | -823 | -823 |
| -823 | -823 | 226  | -823 |

ALPHABET= ACGT

>prsc10\_070. 7

log-odds matrix: alength= 4 w= 11 n= 1592 bayes= 9.04894 E= 1.7e+005

|      |      |      |      |
|------|------|------|------|
| -823 | 226  | -823 | -823 |
| 177  | -823 | -823 | -823 |
| -823 | -823 | -823 | 177  |
| -823 | -823 | -823 | 177  |
| -823 | -823 | -823 | 177  |
| -823 | 168  | 68   | -823 |
| 119  | 68   | -823 | -823 |
| 177  | -823 | -823 | -823 |
| 19   | 68   | 68   | -823 |
| -823 | 226  | -823 | -823 |
| 177  | -823 | -823 | -823 |

ALPHABET= ACGT

>prsc10\_070. 8

log-odds matrix: alength= 4 w= 11 n= 1592 bayes= 9.04894 E= 2.3e+005

|      |      |      |      |
|------|------|------|------|
| -823 | -823 | -823 | 177  |
| 177  | -823 | -823 | -823 |
| 177  | -823 | -823 | -823 |
| 177  | -823 | -823 | -823 |
| -823 | 168  | 68   | -823 |
| 177  | -823 | -823 | -823 |
| 177  | -823 | -823 | -823 |
| 177  | -823 | -823 | -823 |
| 19   | -823 | -823 | 119  |
| 177  | -823 | -823 | -823 |
| 177  | -823 | -823 | -823 |

ALPHABET= ACGT

>prsc1\_007. 2

log-odds matrix: alength= 4 w= 13 n= 417 bayes= 7.69697 E= 3.3e+004

|      |      |      |      |
|------|------|------|------|
| -765 | -765 | -765 | 191  |
| 191  | -765 | -765 | -765 |
| 191  | -765 | -765 | -765 |
| -765 | -765 | 208  | -765 |

74203Suppl emental \_CNSmatri ces. pssm. txt

|      |      |      |      |
|------|------|------|------|
| 91   | -765 | -765 | 91   |
| -765 | -765 | -765 | 191  |
| -765 | -765 | 108  | 91   |
| 91   | -765 | 108  | -765 |
| -765 | -765 | -765 | 191  |
| 191  | -765 | -765 | -765 |
| 191  | -765 | -765 | -765 |
| -765 | 208  | -765 | -765 |
| 191  | -765 | -765 | -765 |

ALPHABET= ACGT

>prsc1\_007. 3

log-odds matri x: al ength= 4 w= 14 n= 415 bayes= 7. 69 E= 5. 2e+004

|      |      |      |      |
|------|------|------|------|
| 191  | -765 | -765 | -765 |
| -765 | -765 | -765 | 191  |
| 191  | -765 | -765 | -765 |
| -765 | -765 | -765 | 191  |
| -765 | 108  | 108  | -765 |
| 91   | -765 | -765 | 91   |
| -765 | 108  | -765 | 91   |
| 91   | -765 | -765 | 91   |
| -765 | 208  | -765 | -765 |
| 191  | -765 | -765 | -765 |
| -765 | 108  | 108  | -765 |
| -765 | -765 | -765 | 191  |
| 191  | -765 | -765 | -765 |
| 191  | -765 | -765 | -765 |

ALPHABET= ACGT

>prsc1\_010. 1

log-odds matri x: al ength= 4 w= 11 n= 557 bayes= 7. 52878 E= 1. 8e+003

|      |      |      |      |
|------|------|------|------|
| 182  | -823 | -823 | -823 |
| 182  | -823 | -823 | -823 |
| -823 | 219  | -823 | -823 |
| 124  | 61   | -823 | -823 |
| -823 | -823 | 161  | 24   |
| 182  | -823 | -823 | -823 |
| 182  | -823 | -823 | -823 |
| -823 | -823 | 219  | -823 |
| -823 | 61   | -823 | 124  |
| -823 | -823 | 219  | -823 |
| -823 | -823 | -823 | 182  |

ALPHABET= ACGT

>prsc1\_010. 4

log-odds matri x: al ength= 4 w= 10 n= 560 bayes= 7. 53657 E= 1. 4e+006

|      |      |      |      |
|------|------|------|------|
| 182  | -823 | -823 | -823 |
| 24   | 161  | -823 | -823 |
| -158 | 89   | 89   | -158 |
| 143  | -158 | -158 | -158 |
| 60   | 89   | -158 | -158 |
| 60   | -158 | -158 | 60   |
| 182  | -823 | -823 | -823 |
| 182  | -823 | -823 | -823 |
| -823 | -823 | 219  | -823 |
| 24   | -823 | 161  | -823 |

ALPHABET= ACGT

>prsc1\_012. 5

74203Suppl emental \_CNSmatri ces. pssm. txt

log-odds matrix: alength= 4 w= 11 n= 610 bayes= 7.24317 E= 4.9e+009

|      |      |      |      |
|------|------|------|------|
| -199 | -199 | 194  | -199 |
| -199 | -199 | -199 | 150  |
| 15   | -199 | 53   | 15   |
| -100 | -100 | -100 | 115  |
| 98   | -199 | -199 | 15   |
| 15   | -199 | -199 | 98   |
| -199 | -199 | 194  | -199 |
| 15   | 53   | -199 | 15   |
| 15   | -199 | 140  | -199 |
| 150  | -199 | -199 | -199 |
| -199 | -199 | 194  | -199 |

ALPHABET= ACGT

>prsc1\_014.1

log-odds matrix: alength= 4 w= 25 n= 1492 bayes= 8.95517 E= 4.3e+003

|      |      |      |      |
|------|------|------|------|
| 181  | -823 | -823 | -823 |
| 122  | -823 | 63   | -823 |
| -823 | -823 | -823 | 181  |
| 181  | -823 | -823 | -823 |
| -823 | -823 | 221  | -823 |
| -823 | -823 | -823 | 181  |
| 23   | 63   | 63   | -823 |
| -823 | -823 | -823 | 181  |
| -823 | -823 | 63   | 122  |
| 181  | -823 | -823 | -823 |
| 181  | -823 | -823 | -823 |
| 181  | -823 | -823 | -823 |
| -823 | 63   | 163  | -823 |
| 23   | -823 | -823 | 122  |
| 181  | -823 | -823 | -823 |
| -823 | -823 | 221  | -823 |
| -823 | -823 | 63   | 122  |
| 181  | -823 | -823 | -823 |
| 181  | -823 | -823 | -823 |
| 23   | 163  | -823 | -823 |
| 181  | -823 | -823 | -823 |
| 23   | -823 | 163  | -823 |
| -823 | 63   | -823 | 122  |
| 181  | -823 | -823 | -823 |
| 181  | -823 | -823 | -823 |

ALPHABET= ACGT

>prsc1\_014.2

log-odds matrix: alength= 4 w= 10 n= 1537 bayes= 8.99812 E= 2.9e+004

|      |      |      |      |
|------|------|------|------|
| -823 | -823 | 221  | -823 |
| -158 | -158 | -158 | 142  |
| 181  | -823 | -823 | -823 |
| -823 | -823 | 221  | -823 |
| -823 | -823 | 221  | -823 |
| -823 | 221  | -823 | -823 |
| -823 | -823 | -823 | 181  |
| 181  | -823 | -823 | -823 |
| 23   | -823 | 163  | -823 |
| 181  | -823 | -823 | -823 |

ALPHABET= ACGT

>prsc1\_014.3

log-odds matrix: alength= 4 w= 11 n= 1534 bayes= 8.9953 E= 4.0e+004

|     |      |      |      |
|-----|------|------|------|
| 181 | -823 | -823 | -823 |
|-----|------|------|------|

74203Suppl emental \_CNSmatri ces. pssm. txt

```
-823 -823 221 -823
-823 -823 221 -823
-823 -823 163 23
181 -823 -823 -823
181 -823 -823 -823
-823 63 163 -823
181 -823 -823 -823
122 -823 63 -823
-823 221 -823 -823
181 -823 -823 -823
```

ALPHABET= ACGT

>prsc1\_014. 4

log-odds matrix: alength= 4 w= 12 n= 1531 bayes= 8.99247 E= 3.6e+005

```
181 -823 -823 -823
122 63 -823 -823
-823 -823 163 23
-823 63 163 -823
-823 -823 163 23
-823 -823 -823 181
-823 63 163 -823
-823 -823 -823 181
-823 -823 221 -823
-823 -823 -823 181
-823 -823 -823 181
-823 -823 -823 181
```

ALPHABET= ACGT

>prsc1\_014. 6

log-odds matrix: alength= 4 w= 11 n= 1534 bayes= 8.9953 E= 7.7e+005

```
-823 -823 -823 181
-823 -823 -823 181
23 -823 163 -823
-823 -823 221 -823
-823 63 163 -823
181 -823 -823 -823
-823 63 163 -823
23 163 -823 -823
-823 -823 -823 181
-823 -823 63 122
-823 -823 -823 181
```

ALPHABET= ACGT

>prsc1\_014. 7

log-odds matrix: alength= 4 w= 11 n= 1534 bayes= 8.9953 E= 8.3e+005

```
-823 221 -823 -823
181 -823 -823 -823
-823 -823 -823 181
-823 -823 163 23
23 -823 63 23
-823 -823 221 -823
181 -823 -823 -823
-823 63 -823 122
181 -823 -823 -823
59 -158 -158 59
-823 -823 221 -823
```

ALPHABET= ACGT

>prsc1\_014. 8

74203Suppl emental \_CNSmatri ces. pssm. txt

log-odds matrix: al length= 4 w= 15 n= 1522 bayes= 8.98394 E= 1.8e+006

|      |      |      |      |
|------|------|------|------|
| -823 | -823 | 221  | -823 |
| -823 | -823 | -823 | 181  |
| -823 | 63   | 63   | 23   |
| 181  | -823 | -823 | -823 |
| 181  | -823 | -823 | -823 |
| 122  | -823 | 63   | -823 |
| -823 | -823 | 63   | 122  |
| -823 | 163  | 63   | -823 |
| 23   | 63   | 63   | -823 |
| -158 | 178  | -158 | -158 |
| 181  | -823 | -823 | -823 |
| 23   | -823 | -823 | 122  |
| 181  | -823 | -823 | -823 |
| -823 | -823 | 221  | -823 |
| 181  | -823 | -823 | -823 |

ALPHABET= ACGT

>prsc1\_015.1

log-odds matrix: al length= 4 w= 11 n= 1858 bayes= 8.53372 E= 2.8e+005

|      |      |      |      |
|------|------|------|------|
| -897 | -897 | -897 | 182  |
| -897 | -897 | -897 | 182  |
| -897 | -897 | 88   | 108  |
| 108  | 88   | -897 | -897 |
| -897 | 88   | -12  | 50   |
| -897 | 220  | -897 | -897 |
| 182  | -897 | -897 | -897 |
| -14  | -231 | 157  | -231 |
| 182  | -897 | -897 | -897 |
| 150  | -12  | -897 | -897 |
| 182  | -897 | -897 | -897 |

ALPHABET= ACGT

>prsc1\_015.3

log-odds matrix: al length= 4 w= 11 n= 1858 bayes= 8.53372 E= 2.8e+010

|      |      |      |      |
|------|------|------|------|
| -897 | 220  | -897 | -897 |
| 160  | -231 | -231 | -231 |
| -14  | 17   | 103  | -231 |
| 121  | -231 | -231 | -14  |
| 69   | 103  | -231 | -231 |
| 160  | -231 | -231 | -231 |
| -231 | 196  | -231 | -231 |
| 160  | -231 | -231 | -231 |
| -231 | 196  | -231 | -231 |
| 69   | 103  | -231 | -231 |
| -231 | 196  | -231 | -231 |

ALPHABET= ACGT

>prsc1\_015.4

log-odds matrix: al length= 4 w= 11 n= 1858 bayes= 8.53372 E= 1.7e+012

|      |      |      |      |
|------|------|------|------|
| 160  | -231 | -231 | -231 |
| 160  | -231 | -231 | -231 |
| -231 | -231 | 196  | -231 |
| 121  | -231 | 17   | -231 |
| -14  | 103  | 17   | -231 |
| 15   | -132 | -132 | 86   |
| 160  | -231 | -231 | -231 |
| -231 | -231 | 196  | -231 |
| -231 | -231 | 157  | -14  |
| -231 | 157  | -231 | -14  |

160 -231 -231 -231

ALPHABET= ACGT

>prsc1\_015. 6

log-odds matrix: alength= 4 w= 10 n= 1863 bayes= 8. 53761 E= 2. 8e+012

|      |      |      |      |
|------|------|------|------|
| -231 | 196  | -231 | -231 |
| -14  | -231 | -231 | 121  |
| 133  | -132 | -132 | -132 |
| 121  | -231 | -231 | -14  |
| -14  | -231 | 17   | 69   |
| -14  | -231 | 157  | -231 |
| -231 | -231 | 196  | -231 |
| -231 | 17   | 103  | -14  |
| -231 | 196  | -231 | -231 |
| -231 | -231 | -231 | 160  |

ALPHABET= ACGT

>prsc1\_017. 1

log-odds matrix: alength= 4 w= 16 n= 1575 bayes= 8. 61747 E= 4. 8e+004

|      |      |      |      |
|------|------|------|------|
| -865 | 123  | 123  | -865 |
| 180  | -865 | -865 | -865 |
| 180  | -865 | -865 | -865 |
| 80   | 23   | -865 | -20  |
| 80   | 23   | -865 | -20  |
| 80   | -865 | -865 | 80   |
| 80   | 123  | -865 | -865 |
| -865 | 223  | -865 | -865 |
| 99   | -199 | -199 | 16   |
| -865 | -865 | 223  | -865 |
| 180  | -865 | -865 | -865 |
| 180  | -865 | -865 | -865 |
| 180  | -865 | -865 | -865 |
| 138  | -865 | 23   | -865 |
| -865 | 223  | -865 | -865 |
| 138  | 23   | -865 | -865 |

ALPHABET= ACGT

>prsc1\_017. 2

log-odds matrix: alength= 4 w= 14 n= 1583 bayes= 8. 6248 E= 3. 1e+006

|      |      |      |      |
|------|------|------|------|
| -865 | 223  | -865 | -865 |
| 180  | -865 | -865 | -865 |
| 180  | -865 | -865 | -865 |
| -199 | 138  | -199 | 16   |
| -20  | 23   | -865 | 80   |
| 180  | -865 | -865 | -865 |
| -865 | 23   | 182  | -865 |
| -20  | 182  | -865 | -865 |
| 138  | -865 | -865 | -20  |
| -20  | 123  | 23   | -865 |
| -20  | 23   | -865 | 80   |
| 80   | 23   | -865 | -20  |
| -865 | 223  | -865 | -865 |
| 180  | -865 | -865 | -865 |

ALPHABET= ACGT

>prsc1\_019. 1

log-odds matrix: alength= 4 w= 43 n= 606 bayes= 7. 65105 E= 4. 2e+003

|      |      |      |     |
|------|------|------|-----|
| -823 | -823 | -823 | 174 |
| 16   | -823 | -823 | 115 |



74203Suppl emental \_CNSmatri ces. pssm. txt

```

174 -823 -823 -823
-823 73 -823 115
16 -823 -823 115
-823 -823 173 16
-823 -823 173 16
174 -823 -823 -823
16 -823 -823 115
174 -823 -823 -823
16 -823 -823 115
-823 173 -823 16
-823 -823 -823 174
16 -823 173 -823
-823 -823 231 -823
-823 173 73 -823
-823 -823 -823 174
-823 -823 73 115
115 -823 73 -823
115 73 -823 -823
-823 -823 -823 174
-823 -823 -823 174
-823 -823 73 115
16 -823 -823 115
16 73 73 -823
-823 173 -823 16
174 -823 -823 -823
-823 -823 73 115
-823 73 -823 115
-823 73 -823 115
-823 -823 231 -823
174 -823 -823 -823
-823 -823 -823 174
16 -823 -823 115
136 -158 -158 -158
-823 173 -823 16
-823 -823 -823 174
-823 -823 73 115
-823 -823 -823 174
16 173 -823 -823
174 -823 -823 -823
-823 -823 -823 174
174 -823 -823 -823

```

ALPHABET= ACGT

>prsc1\_019.2

log-odds matrix: alength= 4 w= 21 n= 672 bayes= 7.8009 E= 9.0e+003

```

174 -823 -823 -823
115 -823 -823 16
-823 -823 231 -823
16 -823 173 -823
174 -823 -823 -823
174 -823 -823 -823
115 -823 -823 16
16 -823 173 -823
115 -823 73 -823
115 73 -823 -823
174 -823 -823 -823
-823 73 -823 115
-823 -823 -823 174
-823 -823 -823 174
-823 231 -823 -823
-823 -823 -823 174
-823 -823 73 115

```

74203Suppl emental \_CNSmatri ces. pssm. txt

|      |      |      |      |
|------|------|------|------|
| 174  | -823 | -823 | -823 |
| -823 | -823 | -823 | 174  |
| -823 | -823 | 73   | 115  |
| -823 | -823 | -823 | 174  |

ALPHABET= ACGT

>prsc1\_021. 1

log-odds matrix: alength= 4 w= 11 n= 984 bayes= 8. 93958 E= 6. 7e+004

|      |      |      |      |
|------|------|------|------|
| 185  | -765 | -765 | -765 |
| 185  | -765 | -765 | -765 |
| -765 | -765 | 215  | -765 |
| -765 | -765 | -765 | 185  |
| -765 | -765 | -765 | 185  |
| 86   | -765 | -765 | 86   |
| -765 | -765 | 215  | -765 |
| 185  | -765 | -765 | -765 |
| -765 | 115  | -765 | 86   |
| -765 | 215  | -765 | -765 |
| -765 | 215  | -765 | -765 |

ALPHABET= ACGT

>prsc1\_021. 3

log-odds matrix: alength= 4 w= 11 n= 984 bayes= 8. 93958 E= 1. 0e+005

|      |      |      |      |
|------|------|------|------|
| -765 | -765 | -765 | 185  |
| -765 | -765 | -765 | 185  |
| -765 | -765 | 215  | -765 |
| -765 | -765 | 115  | 86   |
| -765 | -765 | -765 | 185  |
| -765 | -765 | 215  | -765 |
| -765 | -765 | -765 | 185  |
| 185  | -765 | -765 | -765 |
| 86   | -765 | -765 | 86   |
| -765 | -765 | -765 | 185  |
| -765 | 215  | -765 | -765 |

ALPHABET= ACGT

>prsc1\_021. 4

log-odds matrix: alength= 4 w= 11 n= 984 bayes= 8. 93958 E= 1. 4e+005

|      |      |      |      |
|------|------|------|------|
| 185  | -765 | -765 | -765 |
| -765 | -765 | -765 | 185  |
| 185  | -765 | -765 | -765 |
| -765 | -765 | -765 | 185  |
| -765 | -765 | 215  | -765 |
| 185  | -765 | -765 | -765 |
| 86   | 115  | -765 | -765 |
| 86   | 115  | -765 | -765 |
| -765 | -765 | 215  | -765 |
| -765 | -765 | -765 | 185  |
| 185  | -765 | -765 | -765 |

ALPHABET= ACGT

>prsc1\_022. 1

log-odds matrix: alength= 4 w= 18 n= 1257 bayes= 7. 96809 E= 1. 3e+010

|      |      |      |      |
|------|------|------|------|
| -231 | -231 | -231 | 170  |
| -231 | 183  | -231 | -231 |
| -231 | -231 | -231 | 170  |
| -231 | 144  | 5    | -231 |
| 132  | -231 | 5    | -231 |
| 170  | -231 | -231 | -231 |

74203Suppl emental \_CNSmatri ces. pssm. txt

|      |      |      |      |
|------|------|------|------|
| -231 | -231 | 183  | -231 |
| -231 | 183  | -231 | -231 |
| 132  | -231 | 5    | -231 |
| -231 | 5    | -231 | 132  |
| 132  | -231 | -231 | -5   |
| -5   | 5    | 91   | -231 |
| -231 | -231 | -231 | 170  |
| -132 | -132 | 154  | -132 |
| -5   | 144  | -231 | -231 |
| -231 | -231 | 5    | 132  |
| -231 | -231 | -231 | 170  |
| -231 | -231 | -231 | 170  |

ALPHABET= ACGT

>prsc1\_022. 2

log-odds matrix: alength= 4 w= 10 n= 1297 bayes= 8.01346 E= 7.7e+011

|      |      |      |      |
|------|------|------|------|
| -231 | 183  | -231 | -231 |
| 79   | 5    | -231 | -5   |
| 170  | -231 | -231 | -231 |
| -5   | -231 | 144  | -231 |
| -5   | -231 | 144  | -231 |
| -231 | 144  | 5    | -231 |
| -231 | -231 | -231 | 170  |
| 143  | -132 | -132 | -132 |
| -132 | 105  | -132 | 22   |
| 170  | -231 | -231 | -231 |

ALPHABET= ACGT

>prsc1\_023. 3

log-odds matrix: alength= 4 w= 11 n= 1008 bayes= 8.97441 E= 2.6e+004

|      |      |      |      |
|------|------|------|------|
| -765 | -765 | 232  | -765 |
| -765 | -765 | -765 | 173  |
| 173  | -765 | -765 | -765 |
| -765 | 232  | -765 | -765 |
| 173  | -765 | -765 | -765 |
| 73   | -765 | 132  | -765 |
| -765 | 232  | -765 | -765 |
| -765 | -765 | -765 | 173  |
| 173  | -765 | -765 | -765 |
| -765 | -765 | -765 | 173  |
| -765 | -765 | 232  | -765 |

ALPHABET= ACGT

>prsc1\_023. 7

log-odds matrix: alength= 4 w= 15 n= 1000 bayes= 8.9629 E= 3.8e+004

|      |      |      |      |
|------|------|------|------|
| -765 | 232  | -765 | -765 |
| -765 | -765 | -765 | 173  |
| -765 | -765 | -765 | 173  |
| -765 | -765 | 232  | -765 |
| -765 | -765 | -765 | 173  |
| -765 | -765 | -765 | 173  |
| 73   | -765 | 132  | -765 |
| -765 | -765 | -765 | 173  |
| 173  | -765 | -765 | -765 |
| 173  | -765 | -765 | -765 |
| -765 | -765 | -765 | 173  |
| -765 | 232  | -765 | -765 |
| -765 | -765 | -765 | 173  |
| -765 | -765 | 132  | 73   |
| -765 | 232  | -765 | -765 |

ALPHABET= ACGT

&gt;prsc1\_023. 8

log-odds matrix: alength= 4 w= 14 n= 1002 bayes= 8. 96578 E= 3. 9e+004

|      |      |      |      |
|------|------|------|------|
| -765 | -765 | 232  | -765 |
| -765 | -765 | -765 | 173  |
| -765 | 232  | -765 | -765 |
| -765 | 232  | -765 | -765 |
| -765 | -765 | -765 | 173  |
| -765 | -765 | -765 | 173  |
| 73   | -765 | 132  | -765 |
| -765 | 132  | -765 | 73   |
| -765 | 132  | -765 | 73   |
| -765 | 132  | -765 | 73   |
| -765 | 232  | -765 | -765 |
| -765 | 232  | -765 | -765 |
| -765 | 232  | -765 | -765 |
| -765 | -765 | -765 | 173  |

ALPHABET= ACGT

&gt;prsc1\_035. 3

log-odds matrix: alength= 4 w= 11 n= 1151 bayes= 8. 16365 E= 1. 3e+007

|      |      |      |      |
|------|------|------|------|
| -865 | 27   | -865 | 136  |
| 177  | -865 | -865 | -865 |
| -865 | 227  | -865 | -865 |
| 97   | 54   | -199 | -199 |
| 136  | 27   | -865 | -865 |
| -199 | -199 | -199 | 149  |
| 77   | 27   | -865 | -23  |
| 97   | 54   | -199 | -199 |
| -865 | 227  | -865 | -865 |
| 177  | -865 | -865 | -865 |
| 136  | 27   | -865 | -865 |

ALPHABET= ACGT

&gt;prsc1\_035. 6

log-odds matrix: alength= 4 w= 11 n= 1151 bayes= 8. 16365 E= 1. 2e+008

|      |      |      |      |
|------|------|------|------|
| -865 | -865 | 227  | -865 |
| 177  | -865 | -865 | -865 |
| 97   | -199 | 54   | -199 |
| 149  | -199 | -199 | -199 |
| 77   | -865 | -865 | 77   |
| 136  | -865 | -865 | -23  |
| 14   | 141  | -199 | -199 |
| 97   | -199 | 54   | -199 |
| -865 | -865 | -865 | 177  |
| -23  | 27   | 127  | -865 |
| 177  | -865 | -865 | -865 |

ALPHABET= ACGT

&gt;prsc1\_035. 7

log-odds matrix: alength= 4 w= 11 n= 1151 bayes= 8. 16365 E= 5. 1e+010

|      |      |      |      |
|------|------|------|------|
| -100 | -100 | -100 | 114  |
| -100 | -100 | -100 | 114  |
| -100 | 154  | -100 | -100 |
| 149  | -199 | -199 | -199 |
| -199 | -199 | -199 | 149  |
| -100 | -100 | 154  | -100 |
| 44   | -100 | -100 | 44   |

74203Suppl emental \_CNSmatri ces. pssm. txt

|      |      |      |      |
|------|------|------|------|
| 114  | -100 | -100 | -100 |
| 44   | -100 | 77   | -100 |
| 114  | -100 | -100 | -100 |
| -100 | 154  | -100 | -100 |

ALPHABET= ACGT

>prsc1\_044. 1

log-odds matrix: alength= 4 w= 14 n= 1176 bayes= 8. 61102 E= 8. 6e+003

|      |      |      |      |
|------|------|------|------|
| -823 | -823 | -823 | 182  |
| -823 | -823 | 219  | -823 |
| -823 | -823 | 219  | -823 |
| 182  | -823 | -823 | -823 |
| -823 | 161  | -823 | 24   |
| 182  | -823 | -823 | -823 |
| 24   | -823 | -823 | 124  |
| 24   | -823 | 161  | -823 |
| -823 | 161  | 61   | -823 |
| 182  | -823 | -823 | -823 |
| 182  | -823 | -823 | -823 |
| -823 | 161  | 61   | -823 |
| 182  | -823 | -823 | -823 |
| -823 | -823 | 219  | -823 |

ALPHABET= ACGT

>prsc1\_044. 2

log-odds matrix: alength= 4 w= 12 n= 1182 bayes= 8. 61839 E= 2. 6e+004

|      |      |      |      |
|------|------|------|------|
| -823 | 219  | -823 | -823 |
| -823 | -823 | -823 | 182  |
| -823 | -823 | -823 | 182  |
| -823 | 161  | -823 | 24   |
| -823 | -823 | -823 | 182  |
| -823 | -823 | 219  | -823 |
| -823 | 61   | 161  | -823 |
| -823 | -823 | -823 | 182  |
| 182  | -823 | -823 | -823 |
| -823 | -823 | 161  | 24   |
| 124  | -823 | -823 | 24   |
| -823 | -823 | 219  | -823 |

ALPHABET= ACGT

>prsc1\_044. 3

log-odds matrix: alength= 4 w= 11 n= 1185 bayes= 8. 62205 E= 3. 7e+005

|      |      |      |      |
|------|------|------|------|
| 182  | -823 | -823 | -823 |
| -823 | 161  | 61   | -823 |
| 124  | -823 | -823 | 24   |
| -823 | -823 | 219  | -823 |
| 60   | 89   | -158 | -158 |
| -823 | -823 | 219  | -823 |
| 182  | -823 | -823 | -823 |
| 124  | -823 | 61   | -823 |
| -823 | -823 | -823 | 182  |
| 182  | -823 | -823 | -823 |
| -823 | -823 | -823 | 182  |

ALPHABET= ACGT

>prsc1\_044. 4

log-odds matrix: alength= 4 w= 11 n= 1185 bayes= 8. 62205 E= 4. 2e+005

|      |      |      |      |
|------|------|------|------|
| 182  | -823 | -823 | -823 |
| -823 | -823 | 161  | 24   |

74203Supplemental\_CNSmatrices.pssm.txt

```
-823 219 -823 -823
-823 61 -823 124
-823 161 -823 24
124 -823 -823 24
-823 219 -823 -823
182 -823 -823 -823
-823 -823 -823 182
-823 61 161 -823
182 -823 -823 -823
```

ALPHABET= ACGT

>prsc1\_044.5

log-odds matrix: alength= 4 w= 15 n= 1173 bayes= 8.60733 E= 1.1e+006

```
-823 61 161 -823
-823 -823 61 124
182 -823 -823 -823
-823 -823 219 -823
24 -823 161 -823
-823 61 161 -823
-158 89 -158 60
182 -823 -823 -823
182 -823 -823 -823
124 -823 61 -823
24 -823 61 24
182 -823 -823 -823
24 161 -823 -823
182 -823 -823 -823
182 -823 -823 -823
```

ALPHABET= ACGT

>prsc1\_044.6

log-odds matrix: alength= 4 w= 11 n= 1185 bayes= 8.62205 E= 1.0e+006

```
182 -823 -823 -823
24 -823 -823 124
-823 -823 -823 182
-823 -823 161 24
24 -823 -823 124
-823 219 -823 -823
182 -823 -823 -823
124 -823 -823 24
182 -823 -823 -823
-823 -823 -823 182
-823 -823 -823 182
```

ALPHABET= ACGT

>prsc1\_044.7

log-odds matrix: alength= 4 w= 13 n= 1179 bayes= 8.61471 E= 1.9e+006

```
182 -823 -823 -823
-823 -823 161 24
-823 161 -823 24
24 -823 -823 124
-823 -823 -823 182
-823 61 61 24
124 -823 -823 24
182 -823 -823 -823
-823 219 -823 -823
182 -823 -823 -823
-823 -823 -823 182
-823 61 -823 124
-823 -823 -823 182
```

ALPHABET= ACGT

&gt;prsc1\_049.1

log-odds matrix: alength= 4 w= 12 n= 1051 bayes= 8.44846 E= 7.2e+005

|      |      |      |      |
|------|------|------|------|
| -823 | 51   | 151  | -823 |
| 32   | 151  | -823 | -823 |
| -823 | 210  | -823 | -823 |
| -823 | -823 | 151  | 32   |
| -823 | 51   | 51   | 32   |
| -823 | -823 | -823 | 190  |
| -823 | -823 | 210  | -823 |
| -823 | 151  | 51   | -823 |
| -823 | 151  | 51   | -823 |
| 66   | -158 | -158 | 66   |
| 190  | -823 | -823 | -823 |
| -823 | -823 | -823 | 190  |

ALPHABET= ACGT

&gt;prsc4\_052.1

log-odds matrix: alength= 4 w= 20 n= 1040 bayes= 8.43324 E= 6.8e+003

|      |      |      |      |
|------|------|------|------|
| -823 | -823 | -823 | 179  |
| -823 | -823 | -823 | 179  |
| -823 | -823 | -823 | 179  |
| 21   | -823 | 66   | 21   |
| -823 | -823 | 224  | -823 |
| 179  | -823 | -823 | -823 |
| -823 | -823 | 224  | -823 |
| -823 | 66   | 166  | -823 |
| -823 | -823 | -823 | 179  |
| -823 | -823 | -823 | 179  |
| 120  | -823 | 66   | -823 |
| -823 | -823 | 166  | 21   |
| 21   | -823 | 66   | 21   |
| 179  | -823 | -823 | -823 |
| -823 | 66   | -823 | 120  |
| 179  | -823 | -823 | -823 |
| -823 | -823 | 166  | 21   |
| -823 | -823 | 166  | 21   |
| -823 | -823 | 224  | -823 |
| -823 | -823 | -823 | 179  |

ALPHABET= ACGT

&gt;prsc4\_052.2

log-odds matrix: alength= 4 w= 10 n= 1070 bayes= 8.47438 E= 9.4e+003

|      |      |      |      |
|------|------|------|------|
| -823 | 166  | 66   | -823 |
| -823 | 224  | -823 | -823 |
| 120  | -823 | -823 | 21   |
| 179  | -823 | -823 | -823 |
| 179  | -823 | -823 | -823 |
| -823 | -823 | 224  | -823 |
| -823 | -823 | 224  | -823 |
| 179  | -823 | -823 | -823 |
| 179  | -823 | -823 | -823 |
| 179  | -823 | -823 | -823 |

ALPHABET= ACGT

&gt;prsc4\_052.5

log-odds matrix: alength= 4 w= 13 n= 1061 bayes= 8.46216 E= 4.7e+004

|      |     |      |      |
|------|-----|------|------|
| -823 | 224 | -823 | -823 |
|------|-----|------|------|

74203Suppl emental \_CNSmatri ces. pssm. txt

```

179 -823 -823 -823
120 -823 -823 21
-823 -823 -823 179
21 -823 166 -823
-823 -823 66 120
-823 -823 -823 179
179 -823 -823 -823
-823 -823 -823 179
-823 -823 -823 179
-823 -823 -823 179
-823 166 66 -823
179 -823 -823 -823

```

ALPHABET= ACGT

>prsc4\_054.1

log-odds matrix: alength= 4 w= 20 n= 274 bayes= 6.49719 E= 7.8e+002

```

-823 -823 222 -823
-823 222 -823 -823
22 -823 -823 122
22 64 -823 22
-823 -823 -823 180
122 64 -823 -823
-823 -823 -823 180
22 -823 163 -823
-823 64 -823 122
58 -158 -158 58
-823 64 -823 122
-823 -823 -823 180
-823 163 -823 22
-158 -158 92 58
-823 -823 222 -823
-823 -823 -823 180
-823 -823 222 -823
180 -823 -823 -823
-823 64 163 -823
-823 222 -823 -823

```

ALPHABET= ACGT

>prsc4\_063.1

log-odds matrix: alength= 4 w= 19 n= 909 bayes= 8.2384 E= 1.3e+003

```

-823 230 -823 -823
175 -823 -823 -823
-823 230 -823 -823
-823 -823 -823 175
-823 -823 230 -823
-823 -823 72 116
16 -823 171 -823
-823 171 -823 16
-823 230 -823 -823
136 -158 -158 -158
116 -823 -823 16
-823 72 171 -823
-823 230 -823 -823
16 -823 -823 116
175 -823 -823 -823
-823 230 -823 -823
16 -823 -823 116
-823 -823 -823 175
-823 72 171 -823

```



ALPHABET= ACGT

&gt;prsc4\_063. 6

log-odds matrix: alength= 4 w= 10 n= 936 bayes= 8. 28077 E= 2. 6e+005

|      |      |      |      |
|------|------|------|------|
| -823 | 171  | 72   | -823 |
| 175  | -823 | -823 | -823 |
| 175  | -823 | -823 | -823 |
| -158 | 98   | 98   | -158 |
| -823 | -823 | -823 | 175  |
| -823 | -823 | 72   | 116  |
| -823 | -823 | 230  | -823 |
| 116  | 72   | -823 | -823 |
| 175  | -823 | -823 | -823 |
| -823 | 230  | -823 | -823 |

ALPHABET= ACGT

&gt;prsc4\_063. 8

log-odds matrix: alength= 4 w= 11 n= 933 bayes= 8. 27612 E= 5. 8e+005

|      |      |      |      |
|------|------|------|------|
| 175  | -823 | -823 | -823 |
| -823 | -823 | -823 | 175  |
| 175  | -823 | -823 | -823 |
| -58  | -58  | -58  | 84   |
| 84   | -58  | -58  | -58  |
| -823 | -823 | -823 | 175  |
| 16   | -823 | -823 | 116  |
| -823 | 230  | -823 | -823 |
| 175  | -823 | -823 | -823 |
| -823 | -823 | -823 | 175  |
| -823 | 171  | 72   | -823 |

ALPHABET= ACGT

&gt;prsc4\_063. 9

log-odds matrix: alength= 4 w= 10 n= 936 bayes= 8. 28077 E= 4. 7e+005

|      |      |      |      |
|------|------|------|------|
| 175  | -823 | -823 | -823 |
| 175  | -823 | -823 | -823 |
| 16   | -823 | 72   | 16   |
| -823 | 230  | -823 | -823 |
| -823 | 171  | -823 | 16   |
| 116  | 72   | -823 | -823 |
| -823 | -823 | -823 | 175  |
| 116  | -823 | 72   | -823 |
| -823 | -823 | -823 | 175  |
| -823 | 230  | -823 | -823 |

ALPHABET= ACGT

&gt;spsc10\_003. 2

log-odds matrix: alength= 4 w= 11 n= 500 bayes= 7. 96 E= 1. 2e+004

|      |      |      |      |
|------|------|------|------|
| -765 | 231  | -765 | -765 |
| -765 | 231  | -765 | -765 |
| 174  | -765 | -765 | -765 |
| 74   | 131  | -765 | -765 |
| 74   | -765 | -765 | 74   |
| -765 | 231  | -765 | -765 |
| -765 | -765 | -765 | 174  |
| -765 | -765 | -765 | 174  |
| 74   | -765 | -765 | 74   |
| -765 | -765 | -765 | 174  |
| -765 | 231  | -765 | -765 |

ALPHABET= ACGT

74203Suppl emental \_CNSmatri ces. pssm. txt

```
>srsc10_004. 1
log-odds matri x:  alength= 4  w= 10  n= 952  bayes= 7. 88874  E= 2. 1e+006
-865 -865 -865 183
-865 -865 218 -865
-16 118 18 -865
-865 -865 -865 183
-16 -865 -865 142
-865 18 -865 142
-865 177 -865 -16
83 -865 -865 83
-865 177 -865 -16
-865 -865 -865 183
```

ALPHABET= ACGT

```
>srsc10_005. 10
log-odds matri x:  alength= 4  w= 10  n= 1335  bayes= 8. 37829  E= 1. 9e+010
-199 210 -199 -199
-199 -199 -199 139
88 -199 -199 6
6 -199 156 -199
139 -199 -199 -199
6 -199 -199 88
-199 -199 156 6
-199 210 -199 -199
6 -199 68 6
-865 243 -865 -865
```

ALPHABET= ACGT

```
>srsc10_005. 2
log-odds matri x:  alength= 4  w= 27  n= 1267  bayes= 8. 30264  E= 5. 6e+003
-865 -865 -865 166
-199 210 -199 -199
-199 68 -199 88
66 -865 143 -865
-865 202 -865 -33
-33 143 -865 -33
166 -865 -865 -865
166 -865 -865 -865
125 43 -865 -865
66 143 -865 -865
166 -865 -865 -865
-865 43 -865 125
166 -865 -865 -865
66 -865 143 -865
166 -865 -865 -865
-865 -865 202 -33
-33 43 43 -33
-865 -865 -865 166
-865 202 43 -865
166 -865 -865 -865
-865 -865 202 -33
-865 43 -865 125
-865 -865 -865 166
-33 -865 43 66
125 -865 43 -865
-865 43 -865 125
166 -865 -865 -865
```

ALPHABET= ACGT

```
>srsc10_005. 3
```

74203Suppl emental\_CNSmatri ces. pssm. txt

log-odds matrix: al length= 4 w= 15 n= 1315 bayes= 8. 35645 E= 2. 2e+004

|      |      |      |      |
|------|------|------|------|
| -865 | -865 | 243  | -865 |
| -33  | 202  | -865 | -865 |
| 66   | 43   | -865 | -33  |
| 166  | -865 | -865 | -865 |
| 66   | -865 | -865 | 66   |
| -865 | -865 | 243  | -865 |
| 166  | -865 | -865 | -865 |
| -865 | -865 | -865 | 166  |
| 66   | -865 | -865 | 66   |
| -865 | 202  | -865 | -33  |
| 125  | -865 | -865 | -33  |
| -33  | 43   | 143  | -865 |
| -865 | 243  | -865 | -865 |
| -33  | -865 | -865 | 125  |
| -865 | -865 | -865 | 166  |

ALPHABET= ACGT

>srsc10\_005. 4

log-odds matrix: al length= 4 w= 13 n= 1323 bayes= 8. 36523 E= 2. 4e+005

|      |      |      |      |
|------|------|------|------|
| -865 | -865 | -865 | 166  |
| -33  | -865 | 143  | -33  |
| -865 | 143  | 143  | -865 |
| -865 | -865 | -865 | 166  |
| -865 | -865 | 243  | -865 |
| 66   | -865 | 43   | -33  |
| -33  | 202  | -865 | -865 |
| -865 | -865 | -865 | 166  |
| -199 | -199 | -199 | 139  |
| 166  | -865 | -865 | -865 |
| -865 | -865 | -865 | 166  |
| 6    | -199 | 156  | -199 |
| 166  | -865 | -865 | -865 |

ALPHABET= ACGT

>srsc10\_005. 5

log-odds matrix: al length= 4 w= 10 n= 1335 bayes= 8. 37829 E= 1. 3e+006

|      |      |      |      |
|------|------|------|------|
| -865 | -865 | 243  | -865 |
| 125  | -865 | -865 | -33  |
| 166  | -865 | -865 | -865 |
| -33  | -865 | 43   | 66   |
| -865 | -865 | -865 | 166  |
| 166  | -865 | -865 | -865 |
| 66   | -865 | -865 | 66   |
| -33  | 143  | -865 | -33  |
| -865 | 243  | -865 | -865 |
| 166  | -865 | -865 | -865 |

ALPHABET= ACGT

>srsc10\_005. 6

log-odds matrix: al length= 4 w= 11 n= 1331 bayes= 8. 37395 E= 2. 5e+006

|     |      |      |      |
|-----|------|------|------|
| 166 | -865 | -865 | -865 |
| 125 | -865 | 43   | -865 |
| 125 | -865 | -865 | -33  |
| 166 | -865 | -865 | -865 |
| 66  | -865 | -865 | 66   |
| 66  | -865 | -865 | 66   |
| 125 | 43   | -865 | -865 |
| 166 | -865 | -865 | -865 |
| 166 | -865 | -865 | -865 |

```
-865 243 -865 -865
166 -865 -865 -865
```

ALPHABET= ACGT

>srsc10\_005. 8

log-odds matrix: alength= 4 w= 11 n= 1331 bayes= 8. 37395 E= 5. 2e+006

```
-865 243 -865 -865
-33 43 -865 66
166 -865 -865 -865
166 -865 -865 -865
-865 43 -865 125
66 -865 143 -865
-865 43 -865 125
166 -865 -865 -865
-865 -865 -865 166
66 -865 43 -33
-865 -865 -865 166
```

ALPHABET= ACGT

>srsc10\_006. 2

log-odds matrix: alength= 4 w= 15 n= 185 bayes= 6. 5157 E= 1. 6e+003

```
-765 -765 232 -765
73 -765 132 -765
-765 232 -765 -765
-765 -765 -765 173
-765 -765 232 -765
73 -765 -765 73
-765 132 132 -765
73 -765 132 -765
173 -765 -765 -765
173 -765 -765 -765
-765 132 132 -765
-765 -765 232 -765
173 -765 -765 -765
-765 -765 232 -765
```

ALPHABET= ACGT

>srsc10\_006. 6

log-odds matrix: alength= 4 w= 11 n= 193 bayes= 6. 57743 E= 2. 3e+004

```
-765 -765 -765 173
-765 -765 -765 173
-765 -765 -765 173
-765 -765 -765 173
-765 132 -765 73
73 -765 -765 73
-765 132 -765 73
73 -765 -765 73
-765 -765 -765 173
-765 132 132 -765
173 -765 -765 -765
```

ALPHABET= ACGT

>srsc10\_007. 4

log-odds matrix: alength= 4 w= 10 n= 989 bayes= 8. 94691 E= 1. 6e+004

```
-765 -765 231 -765
-765 231 -765 -765
174 -765 -765 -765
-765 -765 131 74
```

74203Suppl emental \_CNSmatri ces. pssm. txt

```
-765 -765 231 -765
-765 231 -765 -765
 74 -765 -765 74
-765 -765 -765 174
-765 231 -765 -765
-765 231 -765 -765
```

ALPHABET= ACGT

>srsc10\_007. 5

log-odds matrix: alength= 4 w= 11 n= 987 bayes= 8. 94398 E= 2. 5e+004

```
-765 -765 -765 174
-765 -765 231 -765
-765 -765 231 -765
-765 231 -765 -765
 174 -765 -765 -765
-765 -765 -765 174
 74 131 -765 -765
 174 -765 -765 -765
-765 -765 231 -765
-765 -765 -765 174
 174 -765 -765 -765
```

ALPHABET= ACGT

>srsc10\_008. 10

log-odds matrix: alength= 4 w= 13 n= 1563 bayes= 8. 28355 E= 3. 5e+013

```
-132 147 -132 0
 0 67 -132 0
-132 -132 147 0
-132 -132 -132 114
 -32 136 -231 -32
-231 47 -231 100
-231 -231 191 -32
 49 -231 47 -32
-897 -897 183 27
 49 47 -231 -32
 -32 136 47 -231
 -32 -231 -231 100
-132 -132 147 0
```

ALPHABET= ACGT

>srsc10\_008. 1

log-odds matrix: alength= 4 w= 24 n= 1508 bayes= 8. 2317 E= 6. 6e+005

```
-897 -897 -897 159
 27 -897 25 27
-897 -897 -897 159
-897 -897 -897 159
-897 125 -897 85
-897 -897 -897 159
-897 -897 -897 159
 -73 183 -897 -73
 85 -897 25 -73
 -73 -897 -897 127
-897 -897 -897 159
-897 -897 -897 159
-897 25 -897 127
-897 183 -897 27
 100 -231 -231 -32
-231 47 -231 100
-897 -897 -897 159
-897 183 25 -73
```

74203Suppl emental \_CNSmatri ces. pssm. txt

|      |      |      |     |
|------|------|------|-----|
| 49   | 47   | -231 | -32 |
| 100  | -231 | -231 | -32 |
| -897 | 183  | -897 | 27  |
| -897 | -897 | -897 | 159 |
| -897 | -897 | -897 | 159 |
| -897 | -897 | 25   | 127 |

ALPHABET= ACGT

>srsc10\_008. 2

log-odds matrix: alength= 4 w= 11 n= 1573 bayes= 8. 29278 E= 4. 0e+010

|      |      |      |      |
|------|------|------|------|
| -231 | -231 | 136  | 49   |
| -231 | -231 | -231 | 138  |
| -32  | -231 | 191  | -231 |
| -231 | 191  | -231 | -32  |
| 138  | -231 | -231 | -231 |
| -32  | -231 | 191  | -231 |
| -231 | -231 | 136  | 49   |
| 159  | -897 | -897 | -897 |
| -231 | -231 | 191  | -32  |
| -231 | -231 | 231  | -231 |
| -897 | 125  | 183  | -897 |

ALPHABET= ACGT

>srsc10\_008. 3

log-odds matrix: alength= 4 w= 13 n= 1563 bayes= 8. 28355 E= 2. 5e+007

|      |      |      |     |
|------|------|------|-----|
| -897 | -897 | -897 | 159 |
| -897 | -897 | -897 | 159 |
| -897 | 125  | -897 | 85  |
| -73  | -897 | 125  | 27  |
| -897 | 25   | -897 | 127 |
| -897 | -897 | -897 | 159 |
| -897 | -897 | -897 | 159 |
| -32  | -231 | 47   | 49  |
| -897 | -897 | 25   | 127 |
| -897 | -897 | -897 | 159 |
| -897 | -897 | -897 | 159 |
| -897 | -897 | 183  | 27  |
| -897 | 183  | -897 | 27  |

ALPHABET= ACGT

>srsc10\_008. 4

log-odds matrix: alength= 4 w= 11 n= 1573 bayes= 8. 29278 E= 3. 0e+009

|      |      |      |      |
|------|------|------|------|
| 138  | -231 | -231 | -231 |
| -897 | 25   | -897 | 127  |
| -897 | -897 | -897 | 159  |
| -897 | 183  | -897 | 27   |
| -73  | -897 | -897 | 127  |
| -231 | -231 | 191  | -32  |
| 100  | 47   | -231 | -231 |
| 100  | -231 | -231 | -32  |
| -897 | -897 | -897 | 159  |
| -897 | -897 | -897 | 159  |
| -897 | -897 | -897 | 159  |

ALPHABET= ACGT

>srsc10\_011. 1

log-odds matrix: alength= 4 w= 28 n= 1079 bayes= 8. 4865 E= 2. 5e+004

|      |      |      |      |
|------|------|------|------|
| -823 | -823 | -823 | 178  |
| -823 | 67   | 167  | -823 |

74203Suppl emental \_CNSmatri ces. pssm. txt

|      |      |      |      |
|------|------|------|------|
| -823 | 226  | -823 | -823 |
| -823 | -823 | -823 | 178  |
| -823 | -823 | 226  | -823 |
| -823 | -823 | 167  | 19   |
| -823 | -823 | -823 | 178  |
| 178  | -823 | -823 | -823 |
| 19   | 67   | 67   | -823 |
| -823 | -823 | 67   | 119  |
| 19   | -823 | 167  | -823 |
| 119  | -823 | 67   | -823 |
| -823 | 167  | 67   | -823 |
| 19   | 67   | -823 | 19   |
| 178  | -823 | -823 | -823 |
| 19   | 67   | -823 | 19   |
| 178  | -823 | -823 | -823 |
| 19   | -823 | -823 | 119  |
| -823 | -823 | 67   | 119  |
| 178  | -823 | -823 | -823 |
| 19   | -823 | 167  | -823 |
| 178  | -823 | -823 | -823 |
| 178  | -823 | -823 | -823 |
| 178  | -823 | -823 | -823 |
| -158 | 95   | 95   | -158 |
| 19   | -823 | -823 | 119  |
| 178  | -823 | -823 | -823 |
| 178  | -823 | -823 | -823 |

ALPHABET= ACGT

>srsc10\_011. 2

log-odds matrix: al ength= 4 w= 11 n= 1130 bayes= 8. 55331 E= 7. 8e+004

|      |      |      |      |
|------|------|------|------|
| 178  | -823 | -823 | -823 |
| -823 | -823 | -823 | 178  |
| 19   | -823 | -823 | 119  |
| -823 | -823 | -823 | 178  |
| -823 | 226  | -823 | -823 |
| -823 | -823 | -823 | 178  |
| -823 | -823 | 226  | -823 |
| -823 | 67   | 67   | 19   |
| -823 | 167  | -823 | 19   |
| 178  | -823 | -823 | -823 |
| 178  | -823 | -823 | -823 |

ALPHABET= ACGT

>srsc10\_011. 3

log-odds matrix: al ength= 4 w= 13 n= 1124 bayes= 8. 54561 E= 2. 1e+005

|      |      |      |      |
|------|------|------|------|
| -823 | -823 | -823 | 178  |
| -823 | -823 | 226  | -823 |
| 19   | -823 | 167  | -823 |
| 178  | -823 | -823 | -823 |
| -823 | -823 | -823 | 178  |
| 19   | 67   | -823 | 19   |
| -823 | -823 | -823 | 178  |
| -823 | 167  | -823 | 19   |
| -823 | -823 | -823 | 178  |
| -823 | -823 | 67   | 119  |
| 178  | -823 | -823 | -823 |
| 19   | -823 | 67   | 19   |
| -823 | 226  | -823 | -823 |

ALPHABET= ACGT

74203Suppl emental \_CNSmatri ces. pssm. txt

```
>srsc10_011.4
log-odds matrix: alength= 4 w= 10 n= 1133 bayes= 8.55714 E= 1.3e+006
-823 -823 -823 178
-823 -823 -823 178
119 -823 -823 19
119 67 -823 -823
-823 -823 -823 178
-823 -823 167 19
-823 -823 -823 178
-823 67 67 19
-823 -823 -823 178
-823 226 -823 -823
```

ALPHABET= ACGT

```
>srsc1_001.1
log-odds matrix: alength= 4 w= 13 n= 1437 bayes= 8.90087 E= 2.7e+003
-823 231 -823 -823
174 -823 -823 -823
115 -823 73 -823
174 -823 -823 -823
174 -823 -823 -823
-823 173 -823 16
-158 -158 99 53
-823 -823 231 -823
-823 -823 231 -823
-823 -823 -823 174
-823 -823 231 -823
-823 231 -823 -823
-823 -823 -823 174
```

ALPHABET= ACGT

```
>srsc1_001.2
log-odds matrix: alength= 4 w= 15 n= 1431 bayes= 8.89482 E= 7.7e+004
-823 231 -823 -823
16 -823 173 -823
-823 73 73 16
174 -823 -823 -823
174 -823 -823 -823
174 -823 -823 -823
174 -823 -823 -823
-823 173 73 -823
174 -823 -823 -823
16 -823 173 -823
174 -823 -823 -823
174 -823 -823 -823
174 -823 -823 -823
115 -823 73 -823
174 -823 -823 -823
```

ALPHABET= ACGT

```
>srsc10_014.1
log-odds matrix: alength= 4 w= 30 n= 893 bayes= 8.79928 E= 5.2e+003
-765 -765 -765 185
-765 -765 216 -765
185 -765 -765 -765
185 -765 -765 -765
-765 -765 216 -765
-765 -765 216 -765
-765 -765 -765 185
85 -765 -765 85
```



74203Suppl emental \_CNSmatri ces. pssm. txt

|      |      |      |      |
|------|------|------|------|
| 185  | -765 | -765 | -765 |
| -765 | -765 | 216  | -765 |
| 185  | -765 | -765 | -765 |
| -765 | -765 | -765 | 185  |
| -765 | -765 | -765 | 185  |
| 185  | -765 | -765 | -765 |
| 185  | -765 | -765 | -765 |
| -765 | 216  | -765 | -765 |
| 85   | -765 | -765 | 85   |
| -765 | 216  | -765 | -765 |
| 185  | -765 | -765 | -765 |
| 85   | -765 | -765 | 85   |
| -765 | 116  | 116  | -765 |
| -765 | -765 | 216  | -765 |
| 185  | -765 | -765 | -765 |
| -765 | 216  | -765 | -765 |
| -765 | -765 | -765 | 185  |
| -765 | 216  | -765 | -765 |
| 185  | -765 | -765 | -765 |
| 185  | -765 | -765 | -765 |
| 185  | -765 | -765 | -765 |
| 185  | -765 | -765 | -765 |

ALPHABET= ACGT

>srsc10\_014. 3

log-odds matrix: alength= 4 w= 15 n= 923 bayes= 8. 84706 E= 2. 7e+004

|      |      |      |      |
|------|------|------|------|
| -765 | -765 | -765 | 185  |
| -765 | -765 | 216  | -765 |
| -765 | -765 | 216  | -765 |
| -765 | -765 | -765 | 185  |
| -765 | -765 | -765 | 185  |
| -765 | -765 | -765 | 185  |
| -765 | 216  | -765 | -765 |
| 185  | -765 | -765 | -765 |
| -765 | -765 | 116  | 85   |
| -765 | -765 | 116  | 85   |
| 185  | -765 | -765 | -765 |
| 185  | -765 | -765 | -765 |
| -765 | -765 | -765 | 185  |
| -765 | 216  | -765 | -765 |
| -765 | 216  | -765 | -765 |

ALPHABET= ACGT

>srsc10\_014. 6

log-odds matrix: alength= 4 w= 11 n= 931 bayes= 8. 85953 E= 1. 5e+005

|      |      |      |      |
|------|------|------|------|
| -765 | -765 | 216  | -765 |
| -765 | -765 | -765 | 185  |
| -765 | -765 | -765 | 185  |
| -765 | -765 | -765 | 185  |
| -765 | 116  | -765 | 85   |
| 85   | -765 | -765 | 85   |
| -765 | 116  | 116  | -765 |
| 185  | -765 | -765 | -765 |
| -765 | -765 | 216  | -765 |
| -765 | -765 | -765 | 185  |
| -765 | -765 | -765 | 185  |

ALPHABET= ACGT

>srsc10\_014. 8

log-odds matrix: alength= 4 w= 11 n= 931 bayes= 8. 85953 E= 3. 1e+005

74203Suppl emental \_CNSmatri ces. pssm. txt

```

-765 216 -765 -765
185 -765 -765 -765
185 -765 -765 -765
85 116 -765 -765
85 -765 -765 85
-765 -765 -765 185
85 -765 -765 85
85 -765 116 -765
185 -765 -765 -765
-765 -765 216 -765

```

ALPHABET= ACGT

>srsc1\_001.4

log-odds matrix: alength= 4 w= 20 n= 1416 bayes= 8.87958 E= 2.2e+005

```

174 -823 -823 -823
174 -823 -823 -823
-823 73 -823 115
174 -823 -823 -823
-823 231 -823 -823
-158 99 -158 53
-823 231 -823 -823
16 173 -823 -823
53 -158 -158 53
-158 -158 -158 136
-823 -823 -823 174
115 -823 73 -823
174 -823 -823 -823
16 173 -823 -823
-823 231 -823 -823
115 -823 -823 16
-823 -823 -823 174
174 -823 -823 -823
16 -823 -823 115
174 -823 -823 -823

```

ALPHABET= ACGT

>srsc1\_001.5

log-odds matrix: alength= 4 w= 10 n= 1446 bayes= 8.90989 E= 2.1e+005

```

-823 -823 231 -823
16 -823 73 16
16 173 -823 -823
115 -823 -823 16
-823 -823 -823 174
-823 231 -823 -823
174 -823 -823 -823
174 -823 -823 -823
174 -823 -823 -823
-823 -823 231 -823

```

ALPHABET= ACGT

>srsc10\_017.1

log-odds matrix: alength= 4 w= 15 n= 490 bayes= 7.93074 E= 8.2e+002

```

-765 270 -765 -765
-765 170 -765 53
152 -765 -765 -765
-765 -765 -765 152
-765 -765 270 -765
-765 -765 270 -765
-765 270 -765 -765

```

74203Suppl emental \_CNSmatri ces. pssm. txt

|      |      |      |      |
|------|------|------|------|
| 53   | -765 | -765 | 53   |
| -765 | -765 | -765 | 152  |
| -765 | -765 | 270  | -765 |
| 152  | -765 | -765 | -765 |
| 152  | -765 | -765 | -765 |
| 152  | -765 | -765 | -765 |
| 152  | -765 | -765 | -765 |
| -765 | -765 | 270  | -765 |

ALPHABET= ACGT

>srsc10\_017. 2

log-odds matrix: alength= 4 w= 11 n= 498 bayes= 7. 9542 E= 1. 7e+003

|      |      |      |      |
|------|------|------|------|
| -765 | -765 | 270  | -765 |
| -765 | -765 | -765 | 152  |
| -765 | -765 | -765 | 152  |
| 152  | -765 | -765 | -765 |
| -765 | -765 | 270  | -765 |
| -765 | -765 | 270  | -765 |
| -765 | -765 | -765 | 152  |
| 53   | -765 | -765 | 53   |
| 53   | -765 | -765 | 53   |
| -765 | -765 | 270  | -765 |
| -765 | -765 | 270  | -765 |

ALPHABET= ACGT

>srsc10\_017. 5

log-odds matrix: alength= 4 w= 12 n= 496 bayes= 7. 94837 E= 5. 5e+003

|      |      |      |      |
|------|------|------|------|
| -765 | -765 | 270  | -765 |
| -765 | -765 | 270  | -765 |
| 53   | 170  | -765 | -765 |
| -765 | -765 | -765 | 152  |
| 53   | -765 | -765 | 53   |
| -765 | 170  | 170  | -765 |
| -765 | 170  | 170  | -765 |
| 152  | -765 | -765 | -765 |
| 53   | -765 | -765 | 53   |
| 152  | -765 | -765 | -765 |
| -765 | -765 | -765 | 152  |
| -765 | -765 | 270  | -765 |

ALPHABET= ACGT

>srsc1\_001. 7

log-odds matrix: alength= 4 w= 15 n= 1431 bayes= 8. 89482 E= 1. 1e+006

|      |      |      |      |
|------|------|------|------|
| 174  | -823 | -823 | -823 |
| 174  | -823 | -823 | -823 |
| 115  | -823 | -823 | 16   |
| -823 | -823 | 231  | -823 |
| 174  | -823 | -823 | -823 |
| 174  | -823 | -823 | -823 |
| -823 | -823 | -823 | 174  |
| 53   | -158 | 99   | -158 |
| -823 | 73   | 173  | -823 |
| 16   | 73   | -823 | 16   |
| -823 | 73   | 173  | -823 |
| 16   | -823 | -823 | 115  |
| -823 | 173  | -823 | 16   |
| 174  | -823 | -823 | -823 |
| -823 | -823 | -823 | 174  |

74203Suppl emental \_CNSmatri ces. pssm. txt

ALPHABET= ACGT

>srsc10\_018. 1

log-odds matri x: alength= 4 w= 37 n= 254 bayes= 6. 97728 E= 1. 8e+001

|      |      |      |      |
|------|------|------|------|
| 189  | -765 | -765 | -765 |
| -765 | 210  | -765 | -765 |
| 189  | -765 | -765 | -765 |
| 189  | -765 | -765 | -765 |
| -765 | -765 | 210  | -765 |
| -765 | 210  | -765 | -765 |
| 189  | -765 | -765 | -765 |
| 189  | -765 | -765 | -765 |
| -765 | -765 | 210  | -765 |
| 189  | -765 | -765 | -765 |
| -765 | -765 | -765 | 189  |
| -765 | -765 | -765 | 189  |
| -765 | 111  | 111  | -765 |
| 189  | -765 | -765 | -765 |
| -765 | -765 | 210  | -765 |
| -765 | -765 | -765 | 189  |
| -765 | -765 | -765 | 189  |
| -765 | -765 | -765 | 189  |
| -765 | -765 | -765 | 189  |
| -765 | -765 | -765 | 189  |
| 189  | -765 | -765 | -765 |
| 189  | -765 | -765 | -765 |
| -765 | -765 | 210  | -765 |
| -765 | -765 | -765 | 189  |
| -765 | -765 | 210  | -765 |
| -765 | -765 | -765 | 189  |
| -765 | -765 | 210  | -765 |
| -765 | -765 | 210  | -765 |
| 90   | -765 | -765 | 90   |
| -765 | -765 | 210  | -765 |
| -765 | -765 | 210  | -765 |
| -765 | -765 | -765 | 189  |
| -765 | 210  | -765 | -765 |
| 189  | -765 | -765 | -765 |
| -765 | -765 | -765 | 189  |
| -765 | -765 | 210  | -765 |

ALPHABET= ACGT

>srsc10\_018. 2

log-odds matri x: alength= 4 w= 12 n= 304 bayes= 7. 2384 E= 3. 2e+002

|      |      |      |      |
|------|------|------|------|
| -765 | 210  | -765 | -765 |
| -765 | -765 | -765 | 189  |
| 189  | -765 | -765 | -765 |
| -765 | 210  | -765 | -765 |
| -765 | -765 | -765 | 189  |
| -765 | -765 | 210  | -765 |
| -765 | 210  | -765 | -765 |
| 189  | -765 | -765 | -765 |
| -765 | -765 | 210  | -765 |
| -765 | 210  | -765 | -765 |
| -765 | 210  | -765 | -765 |
| -765 | 210  | -765 | -765 |

ALPHABET= ACGT

>srsc10\_018. 3

log-odds matri x: alength= 4 w= 21 n= 286 bayes= 7. 14975 E= 4. 7e+002

|     |      |      |      |
|-----|------|------|------|
| 189 | -765 | -765 | -765 |
|-----|------|------|------|

74203Suppl emental \_CNSmatri ces. pssm. txt

```

-765 -765 210 -765
-765 210 -765 -765
189 -765 -765 -765
90 -765 111 -765
-765 -765 210 -765
-765 210 -765 -765
-765 -765 -765 189
-765 -765 210 -765
189 -765 -765 -765
189 -765 -765 -765
-765 -765 -765 189
-765 -765 210 -765
-765 -765 -765 189
-765 210 -765 -765
-765 210 -765 -765
-765 111 -765 90
189 -765 -765 -765
189 -765 -765 -765
-765 -765 -765 189
-765 210 -765 -765

```

ALPHABET= ACGT

>srsc10\_018. 4

log-odds matrix: alength= 4 w= 29 n= 270 bayes= 7.06609 E= 2.1e+003

```

-765 210 -765 -765
-765 111 111 -765
189 -765 -765 -765
189 -765 -765 -765
189 -765 -765 -765
-765 -765 210 -765
-765 -765 210 -765
-765 111 -765 90
189 -765 -765 -765
189 -765 -765 -765
189 -765 -765 -765
-765 -765 210 -765
-765 111 -765 90
-765 -765 -765 189
-765 -765 210 -765
-765 -765 -765 189
90 -765 111 -765
189 -765 -765 -765
-765 -765 210 -765
-765 111 -765 90
-765 -765 -765 189
-765 210 -765 -765
90 -765 -765 90
189 -765 -765 -765
90 111 -765 -765
-765 -765 -765 189
-765 210 -765 -765
189 -765 -765 -765
-765 -765 210 -765

```

ALPHABET= ACGT

>srsc1\_003. 2

log-odds matrix: alength= 4 w= 14 n= 569 bayes= 7.5597 E= 2.7e+004

```

-823 -823 219 -823
-823 -823 -823 182
-823 61 -823 124
-823 -823 -823 182

```

74203Suppl emental \_CNSmatri ces. pssm. txt

```
-823 161 61 -823
-823 -823 -823 182
24 -823 61 24
-823 161 61 -823
-823 -823 61 124
-823 61 -823 124
-823 219 -823 -823
-823 -823 61 124
-823 -823 -823 182
-823 -823 219 -823
```

ALPHABET= ACGT

>srsc1\_003. 4

log-odds matrix: alength= 4 w= 11 n= 578 bayes= 7.58246 E= 3.0e+005

```
-823 -823 -823 182
-823 -823 219 -823
-823 -823 61 124
24 61 -823 24
182 -823 -823 -823
-823 -823 -823 182
24 -823 61 24
-823 161 -823 24
-823 219 -823 -823
24 -823 -823 124
182 -823 -823 -823
```

ALPHABET= ACGT

>srsc1\_004. 1

log-odds matrix: alength= 4 w= 14 n= 858 bayes= 7.73809 E= 1.4e+000

```
-865 -865 -865 172
-865 -865 -865 172
130 -865 -865 -28
-865 235 -865 -865
172 -865 -865 -865
-865 -865 -865 172
172 -865 -865 -865
-865 -865 35 130
-865 193 -865 -28
-865 -865 -865 172
-865 -865 -865 172
-865 -865 -865 172
-865 -865 -865 235
-865 -865 -865 172
```

ALPHABET= ACGT

>srsc1\_004. 2

log-odds matrix: alength= 4 w= 21 n= 830 bayes= 7.69 E= 6.0e+000

```
-865 -865 35 130
-28 -865 193 -865
-865 -865 -865 172
130 -865 35 -865
-865 -865 235 -865
-865 35 -865 130
72 -865 -865 72
-865 193 35 -865
-865 -865 -865 172
72 -865 -865 72
-865 193 35 -865
-865 193 -865 -28
72 135 -865 -865
```

74203Suppl emental \_CNSmatri ces. pssm. txt

```

-28    35   -865    72
-28   -865   -865   130
-865  -865   -865   172
-865  -865   -865   172
-865    35    193  -865
-865   235   -865  -865
-865  -865   -865   172
-865  -865   235  -865

```

ALPHABET= ACGT

>srsc1\_004. 3

log-odds matrix: alength= 4 w= 11 n= 870 bayes= 7.75822 E= 2.1e+004

```

-865  -865   -865   172
-28   -865   -865   130
-865  -865   235  -865
-865  -865   235  -865
-865   135   -865    72
-28   -865    35    72
-865    35   -865   130
-865  -865   193  -28
-865  -865   -865   172
-865  -865   -865   172
 172  -865   -865  -865

```

ALPHABET= ACGT

>srsc1\_007. 1

log-odds matrix: alength= 4 w= 17 n= 1378 bayes= 8.42417 E= 1.4e+004

```

 182  -865   -865  -865
-865  -865   -865   182
 141  -865   -865  -17
-865   20   -865   141
-865  -865   -865   182
-865  -865   -865   182
  82  -865    20  -17
 182  -865   -865  -865
-865  -865   -865   182
  82  -865    20  -17
-865  -865   219  -865
 -17  -865   120  -17
-865  -865   -865   182
-865  -865   -865   182
  82  -865    20  -17
-865  -865   -865   182
-865   178   -865  -17

```

ALPHABET= ACGT

>srsc1\_007. 3

log-odds matrix: alength= 4 w= 10 n= 1406 bayes= 8.45327 E= 1.7e+009

```

-865  -865   -865   182
 154  -199  -199  -199
 118  -100  -100  -100
  18   134  -199  -199
-199  -199  -199   154
  18  -199   134  -199
-865  -865   -865   182
-199  -199   134    18
-865  -865   219  -865
-199   188  -199  -199

```

ALPHABET= ACGT

>srsc1\_007. 5

log-odds matrix: alength= 4 w= 11 n= 1402 bayes= 8. 44915 E= 1. 3e+011

|      |      |      |      |
|------|------|------|------|
| -199 | -199 | 188  | -199 |
| 18   | 134  | -199 | -199 |
| 154  | -199 | -199 | -199 |
| 154  | -199 | -199 | -199 |
| 101  | 48   | -199 | -199 |
| 154  | -199 | -199 | -199 |
| 18   | -199 | -199 | 101  |
| -199 | 48   | -199 | 101  |
| 154  | -199 | -199 | -199 |
| -199 | -199 | -199 | 154  |
| -199 | 188  | -199 | -199 |

ALPHABET= ACGT

>srsc1\_008. 6

log-odds matrix: alength= 4 w= 11 n= 784 bayes= 8. 61102 E= 9. 6e+004

|      |      |      |      |
|------|------|------|------|
| -765 | -765 | 210  | -765 |
| -765 | 110  | -765 | 90   |
| -765 | -765 | 210  | -765 |
| 189  | -765 | -765 | -765 |
| -765 | -765 | -765 | 189  |
| 90   | -765 | 110  | -765 |
| -765 | -765 | 210  | -765 |
| -765 | -765 | 110  | 90   |
| 90   | -765 | -765 | 90   |
| -765 | -765 | 210  | -765 |
| -765 | 210  | -765 | -765 |

ALPHABET= ACGT

>srsc1\_008. 7

log-odds matrix: alength= 4 w= 10 n= 786 bayes= 8. 61471 E= 1. 7e+005

|      |      |      |      |
|------|------|------|------|
| -765 | -765 | -765 | 189  |
| 189  | -765 | -765 | -765 |
| 189  | -765 | -765 | -765 |
| -765 | -765 | -765 | 189  |
| 90   | -765 | 110  | -765 |
| 90   | -765 | -765 | 90   |
| -765 | -765 | 210  | -765 |
| 90   | -765 | 110  | -765 |
| -765 | -765 | -765 | 189  |
| -765 | 210  | -765 | -765 |

ALPHABET= ACGT

>srsc11\_002. 1

log-odds matrix: alength= 4 w= 12 n= 1845 bayes= 8. 52356 E= 2. 9e+012

|      |      |      |      |
|------|------|------|------|
| -12  | -231 | 154  | -231 |
| 162  | -231 | -231 | -231 |
| 162  | -231 | -231 | -231 |
| 162  | -231 | -231 | -231 |
| 123  | 14   | -231 | -231 |
| -231 | -231 | 14   | 123  |
| 71   | -231 | 100  | -231 |
| -231 | -231 | 14   | 123  |
| -231 | -231 | -231 | 162  |
| 123  | 14   | -231 | -231 |
| -231 | -231 | 154  | -12  |
| -231 | 193  | -231 | -231 |



74203Suppl emental \_CNSmatri ces. pssm. txt

ALPHABET= ACGT

>srsc11\_003. 5

log-odds matrix: al length= 4 w= 10 n= 779 bayes= 8. 60177 E= 1. 6e+004

|      |      |      |      |
|------|------|------|------|
| 171  | -765 | -765 | -765 |
| -765 | -765 | 234  | -765 |
| 110  | -99  | -99  | -99  |
| -765 | 234  | -765 | -765 |
| 171  | -765 | -765 | -765 |
| -765 | -765 | -765 | 171  |
| -765 | -765 | -765 | 171  |
| -765 | -765 | 234  | -765 |
| 171  | -765 | -765 | -765 |
| -765 | 234  | -765 | -765 |

ALPHABET= ACGT

>srsc11\_003. 6

log-odds matrix: al length= 4 w= 12 n= 775 bayes= 8. 59432 E= 2. 5e+004

|      |      |      |      |
|------|------|------|------|
| -765 | 234  | -765 | -765 |
| -765 | 234  | -765 | -765 |
| 72   | -765 | -765 | 72   |
| -765 | -765 | -765 | 171  |
| -765 | 234  | -765 | -765 |
| 171  | -765 | -765 | -765 |
| 72   | -765 | 134  | -765 |
| -765 | -765 | -765 | 171  |
| -765 | -765 | 134  | 72   |
| -765 | -765 | 234  | -765 |
| 171  | -765 | -765 | -765 |
| -765 | -765 | 234  | -765 |

ALPHABET= ACGT

>srsc11\_003. 9

log-odds matrix: al length= 4 w= 13 n= 773 bayes= 8. 59059 E= 4. 0e+004

|      |      |      |      |
|------|------|------|------|
| -765 | -765 | 234  | -765 |
| -765 | -765 | 234  | -765 |
| -765 | 234  | -765 | -765 |
| -765 | -765 | -765 | 171  |
| -765 | 134  | -765 | 72   |
| 72   | -765 | 134  | -765 |
| -765 | -765 | -765 | 171  |
| -765 | -765 | -765 | 171  |
| -765 | -765 | -765 | 171  |
| -765 | -765 | -765 | 171  |
| 72   | -765 | -765 | 72   |
| -765 | 234  | -765 | -765 |
| -765 | -765 | -765 | 171  |

ALPHABET= ACGT

>srsc11\_004. 3

log-odds matrix: al length= 4 w= 12 n= 723 bayes= 8. 49386 E= 9. 5e+003

|      |      |      |      |
|------|------|------|------|
| -765 | -765 | 245  | -765 |
| -765 | -765 | -765 | 165  |
| 65   | -765 | 145  | -765 |
| -765 | -765 | -765 | 165  |
| -765 | -765 | 245  | -765 |
| -765 | -765 | -765 | 165  |
| 165  | -765 | -765 | -765 |
| -765 | -765 | -765 | 165  |
| 165  | -765 | -765 | -765 |

74203Suppl emental \_CNSmatri ces. pssm. txt

|      |      |      |      |
|------|------|------|------|
| -765 | 245  | -765 | -765 |
| -765 | 245  | -765 | -765 |
| -765 | -765 | -765 | 165  |

ALPHABET= ACGT

>srsc11\_004. 4

log-odds matri x: al engh= 4 w= 11 n= 725 bayes= 8. 49785 E= 9. 6e+003

|      |      |      |      |
|------|------|------|------|
| -765 | 245  | -765 | -765 |
| -765 | -765 | -765 | 165  |
| -765 | -765 | -765 | 165  |
| -765 | -765 | -765 | 165  |
| -765 | -765 | -765 | 165  |
| -765 | -765 | 245  | -765 |
| -765 | -765 | -765 | 165  |
| -765 | -765 | 145  | 65   |
| -765 | -765 | 245  | -765 |
| 165  | -765 | -765 | -765 |
| -765 | 245  | -765 | -765 |

ALPHABET= ACGT

>srsc11\_004. 8

log-odds matri x: al engh= 4 w= 13 n= 721 bayes= 8. 48985 E= 1. 7e+004

|      |      |      |      |
|------|------|------|------|
| -765 | -765 | -765 | 165  |
| -765 | -765 | 245  | -765 |
| -765 | 245  | -765 | -765 |
| 65   | -765 | -765 | 65   |
| -765 | -765 | 245  | -765 |
| -765 | -765 | -765 | 165  |
| -765 | -765 | -765 | 165  |
| 165  | -765 | -765 | -765 |
| -765 | 145  | -765 | 65   |
| -765 | 245  | -765 | -765 |
| 165  | -765 | -765 | -765 |
| -765 | -765 | -765 | 165  |
| 165  | -765 | -765 | -765 |

ALPHABET= ACGT

>srsc11\_006. 10

log-odds matri x: al engh= 4 w= 11 n= 1530 bayes= 8. 99152 E= 2. 5e+005

|      |      |      |      |
|------|------|------|------|
| -823 | -823 | -823 | 166  |
| -823 | -823 | -823 | 166  |
| -823 | 243  | -823 | -823 |
| -823 | 85   | -823 | 108  |
| -823 | -823 | 85   | 108  |
| -823 | -823 | -823 | 166  |
| -823 | -823 | -823 | 166  |
| -823 | -823 | -823 | 166  |
| 108  | 85   | -823 | -823 |
| -823 | -823 | -823 | 166  |
| -823 | -823 | 243  | -823 |

ALPHABET= ACGT

>srsc11\_006. 2

log-odds matri x: al engh= 4 w= 15 n= 1518 bayes= 8. 98014 E= 2. 8e+004

|      |      |      |      |
|------|------|------|------|
| -823 | -823 | -823 | 166  |
| -823 | -823 | 243  | -823 |
| 108  | 85   | -823 | -823 |
| -823 | -823 | -823 | 166  |
| -823 | -823 | 243  | -823 |

74203Suppl emental \_CNSmatri ces. pssm. txt

```

-823 -823 243 -823
108 85 -823 -823
-823 -823 -823 166
166 -823 -823 -823
166 -823 -823 -823
8 85 -823 8
-823 -823 85 108
108 -823 85 -823
-823 -823 243 -823
166 -823 -823 -823

```

ALPHABET= ACGT

>srsc11\_006.3

log-odds matrix: alength= 4 w= 11 n= 1530 bayes= 8.99152 E= 3.3e+004

```

-823 -823 -823 166
-823 -823 -823 166
-823 243 -823 -823
166 -823 -823 -823
-823 -823 85 108
-823 -823 -823 166
-823 -823 -823 166
-823 85 85 8
-823 -823 243 -823
-823 -823 -823 166
-823 -823 243 -823

```

ALPHABET= ACGT

>srsc11\_006.4

log-odds matrix: alength= 4 w= 10 n= 1533 bayes= 8.99435 E= 2.2e+004

```

-823 -823 243 -823
-823 -823 -823 166
-823 -823 -823 166
-823 -823 -823 166
-823 185 85 -823
166 -823 -823 -823
8 -823 -823 108
-823 -823 -823 166
-823 -823 243 -823
-823 -823 243 -823

```

ALPHABET= ACGT

>srsc11\_006.5

log-odds matrix: alength= 4 w= 20 n= 1503 bayes= 8.96578 E= 4.0e+004

```

-823 -823 243 -823
-823 185 85 -823
166 -823 -823 -823
-823 -823 -823 166
-823 243 -823 -823
166 -823 -823 -823
129 -158 -158 -158
8 -823 185 -823
8 -823 85 8
-823 -823 -823 166
-823 -823 85 108
-823 -823 -823 166
-823 243 -823 -823
-823 -823 -823 166
108 -823 85 -823
-823 185 -823 8
8 85 -823 8

```

74203Suppl emental \_CNSmatri ces. pssm. txt

|      |      |      |      |
|------|------|------|------|
| -823 | -823 | -823 | 166  |
| 8    | -823 | -823 | 108  |
| -823 | 243  | -823 | -823 |

ALPHABET= ACGT

>srsc11\_006.6

log-odds matrix: alength= 4 w= 10 n= 1533 bayes= 8.99435 E= 7.4e+004

|      |      |      |      |
|------|------|------|------|
| 166  | -823 | -823 | -823 |
| 166  | -823 | -823 | -823 |
| -823 | -823 | 243  | -823 |
| -823 | 243  | -823 | -823 |
| -823 | -823 | -823 | 166  |
| 166  | -823 | -823 | -823 |
| -823 | 85   | 185  | -823 |
| 108  | -823 | -823 | 8    |
| -823 | -823 | -823 | 166  |
| -823 | -823 | -823 | 166  |

ALPHABET= ACGT

>srsc11\_006.7

log-odds matrix: alength= 4 w= 15 n= 1518 bayes= 8.98014 E= 1.6e+005

|      |      |      |      |
|------|------|------|------|
| -823 | -823 | -823 | 166  |
| -823 | 185  | 85   | -823 |
| 8    | 185  | -823 | -823 |
| -823 | -823 | -823 | 166  |
| -823 | -823 | 243  | -823 |
| -823 | -823 | 243  | -823 |
| 8    | 85   | 85   | -823 |
| 166  | -823 | -823 | -823 |
| -823 | -823 | 85   | 108  |
| 8    | 185  | -823 | -823 |
| -823 | -823 | -823 | 166  |
| -823 | 185  | 85   | -823 |
| 166  | -823 | -823 | -823 |
| 108  | 85   | -823 | -823 |
| 166  | -823 | -823 | -823 |

ALPHABET= ACGT

>srsc11\_006.8

log-odds matrix: alength= 4 w= 11 n= 1530 bayes= 8.99152 E= 1.8e+005

|      |      |      |      |
|------|------|------|------|
| -823 | -823 | 243  | -823 |
| -823 | 185  | -823 | 8    |
| -823 | -823 | -823 | 166  |
| -823 | 185  | -823 | 8    |
| -823 | -823 | 85   | 108  |
| -823 | -823 | -823 | 166  |
| -823 | -823 | 243  | -823 |
| 8    | -823 | 85   | 8    |
| -823 | -823 | -823 | 166  |
| -823 | 243  | -823 | -823 |
| 166  | -823 | -823 | -823 |

ALPHABET= ACGT

>srsc11\_006.9

log-odds matrix: alength= 4 w= 10 n= 1533 bayes= 8.99435 E= 2.1e+005

|      |      |      |     |
|------|------|------|-----|
| -823 | -823 | -823 | 166 |
| -823 | -823 | 185  | 8   |
| -823 | 185  | -823 | 8   |
| -823 | -823 | -823 | 166 |

74203Suppl emental \_CNSmatri ces. pssm. txt

|      |      |      |      |
|------|------|------|------|
| -823 | -823 | 85   | 108  |
| 166  | -823 | -823 | -823 |
| -823 | -823 | 243  | -823 |
| -823 | 243  | -823 | -823 |
| 166  | -823 | -823 | -823 |
| -823 | -823 | -823 | 166  |

ALPHABET= ACGT

>srsc11\_007. 1

log-odds matri x: al ength= 4 w= 28 n= 1080 bayes= 8. 07146 E= 6. 7e-001

|      |      |      |      |
|------|------|------|------|
| -865 | -865 | 229  | -865 |
| -865 | -865 | -865 | 175  |
| 175  | -865 | -865 | -865 |
| 175  | -865 | -865 | -865 |
| -865 | -865 | 188  | -25  |
| -865 | -865 | -865 | 175  |
| 134  | 30   | -865 | -865 |
| -865 | -865 | -865 | 175  |
| -865 | -865 | 30   | 134  |
| -865 | -865 | 229  | -865 |
| 75   | 30   | 30   | -865 |
| -865 | -865 | -865 | 175  |
| -865 | 188  | -865 | -25  |
| 175  | -865 | -865 | -865 |
| -865 | -865 | 188  | -25  |
| -865 | -865 | 188  | -25  |
| -865 | 30   | 188  | -865 |
| 134  | -865 | -865 | -25  |
| -25  | 130  | -865 | -25  |
| 134  | -865 | -865 | -25  |
| -865 | -865 | -865 | 175  |
| -25  | 30   | 130  | -865 |
| -25  | -865 | 188  | -865 |
| -25  | -865 | -865 | 134  |
| -865 | 30   | -865 | 134  |
| 75   | 30   | -865 | -25  |
| 175  | -865 | -865 | -865 |
| -865 | -865 | -865 | 175  |

ALPHABET= ACGT

>srsc11\_007. 5

log-odds matri x: al ength= 4 w= 12 n= 1144 bayes= 8. 15482 E= 2. 3e+010

|      |      |      |      |
|------|------|------|------|
| -199 | 197  | -199 | -199 |
| 95   | 56   | -199 | -199 |
| -199 | 56   | -199 | 95   |
| 95   | 56   | -199 | -199 |
| -199 | -199 | -199 | 147  |
| -199 | 56   | -199 | 95   |
| -199 | -199 | -199 | 147  |
| -199 | -199 | -199 | 147  |
| 13   | 143  | -199 | -199 |
| -199 | 197  | -199 | -199 |
| 147  | -199 | -199 | -199 |
| -199 | -199 | 197  | -199 |

ALPHABET= ACGT

>srsc11\_007. 7

log-odds matri x: al ength= 4 w= 21 n= 1108 bayes= 8. 10852 E= 4. 4e+010

|      |      |      |      |
|------|------|------|------|
| 147  | -199 | -199 | -199 |
| -199 | -199 | -199 | 147  |

74203Suppl emental \_CNSmatri ces. pssm. txt

```

-199    56   -199    95
-199    56   143   -199
  95   -199    56   -199
-199    56   -199    95
  13   -199   -199    95
  13   -199   -199    95
 147   -199   -199   -199
  95   -199   -199    13
-199   -199   -199   147
-199   -199   -199   147
-199    56    56    13
  95   -199    56   -199
 147   -199   -199   -199
 147   -199   -199   -199
-199   -199   -199   147
  13   -199    56    13
-199   -199   -199   147
-199   143    56   -199
-199   143   -199    13

```

ALPHABET= ACGT

>srsc11\_007. 8

log-odds matrix: alength= 4 w= 11 n= 1148 bayes= 8. 15987 E= 3. 5e+010

```

-199   -199   -199   147
 147   -199   -199   -199
-199   -199   143    13
-199   -199   -199   147
  13   -199   -199    95
-199   -199   -199   147
 147   -199   -199   -199
-199    56   -199    95
-199   -199   -199   147
-199   -199   -199   147
-199   -199   -199   147

```

ALPHABET= ACGT

>srsc11\_014. 1

log-odds matrix: alength= 4 w= 36 n= 1066 bayes= 8. 05257 E= 3. 3e+002

```

 186   -865   -865   -865
  -14   -865    15    86
-865   -865   -865   186
 186   -865   -865   -865
  -14    15    15   -14
  86   -865   -865    86
-865   115   115   -865
 186   -865   -865   -865
  86    15   -865   -14
-865   115   115   -865
-865   -865   -865   186
-865   115    15   -14
 144    15   -865   -865
  86   -865   -865    86
-865   215   -865   -865
 186   -865   -865   -865
  -14   -865   115   -14
-199    44    44    21
-865   -865   -865   186
  86   -865   115   -865
 186   -865   -865   -865
  86   -865   115   -865
 186   -865   -865   -865

```

74203Suppl emental \_CNSmatri ces. pssm. txt

```

-865 15 -865 144
105 -199 -199 21
-14 15 115 -865
186 -865 -865 -865
186 -865 -865 -865
186 -865 -865 -865
21 -199 130 -199
144 15 -865 -865
-14 115 15 -865
-199 184 -199 -199
86 -865 -865 86
186 -865 -865 -865
-865 15 -865 144

```

ALPHABET= ACGT

>srsc11\_014. 2

log-odds matrix: alength= 4 w= 10 n= 1170 bayes= 8.18735 E= 3.8e+005

```

186 -865 -865 -865
-865 -865 115 86
-865 -865 115 86
-14 115 -865 -14
-865 215 -865 -865
186 -865 -865 -865
-865 -865 215 -865
-865 -865 215 -865
-865 -865 15 144
144 15 -865 -865

```

ALPHABET= ACGT

>srsc11\_017. 1

log-odds matrix: alength= 4 w= 14 n= 1230 bayes= 8.67596 E= 1.8e+004

```

175 -823 -823 -823
-823 -823 230 -823
-823 -823 -823 175
-823 72 72 16
-823 -823 -823 175
136 -158 -158 -158
16 -823 171 -823
-823 -823 -823 175
-823 -823 -823 175
-823 -823 230 -823
-823 230 -823 -823
175 -823 -823 -823
-823 171 -823 16
-823 -823 -823 175

```

ALPHABET= ACGT

>srsc11\_017. 2

log-odds matrix: alength= 4 w= 13 n= 1233 bayes= 8.67948 E= 6.6e+004

```

-823 -823 -823 175
-823 -823 -823 175
-823 -823 -823 175
175 -823 -823 -823
-823 -823 -823 175
175 -823 -823 -823
-823 -823 -823 175
116 -823 -823 16
-823 -823 -823 175
-823 -823 230 -823
-823 171 -823 16

```

74203Suppl emental \_CNSmatri ces. pssm. txt

```
-823 72 -823 116
-823 -823 -823 175
```

ALPHABET= ACGT

>srsc11\_017.5

log-odds matrix: alength= 4 w= 14 n= 1230 bayes= 8.67596 E= 3.2e+006

```
-823 -823 230 -823
-823 -823 -823 175
175 -823 -823 -823
16 -823 -823 116
-823 -823 -823 175
16 72 -823 16
16 -823 -823 116
16 72 -823 16
-823 171 72 -823
-823 -823 -823 175
116 -823 -823 16
16 72 72 -823
-823 230 -823 -823
175 -823 -823 -823
```

ALPHABET= ACGT

>srsc11\_017.6

log-odds matrix: alength= 4 w= 15 n= 1227 bayes= 8.67243 E= 5.1e+008

```
-823 -823 230 -823
116 -823 -823 16
116 -823 -823 16
-158 -158 185 -158
54 -158 -158 54
-158 185 -158 -158
-158 185 -158 -158
-158 98 98 -158
136 -158 -158 -158
-158 98 98 -158
-158 -158 -158 136
-158 -158 -158 136
-158 -158 -158 136
-158 -158 -158 136
-158 -158 185 -158
```

ALPHABET= ACGT

>srsc11\_024.1

log-odds matrix: alength= 4 w= 27 n= 1105 bayes= 8.52095 E= 3.0e+004

```
-823 -823 -823 160
-823 -823 -823 160
-823 -823 -823 160
-158 208 -158 -158
-823 -823 -823 160
2 -823 196 -823
160 -823 -823 -823
102 -823 -823 2
-158 208 -158 -158
160 -823 -823 -823
-158 208 -158 -158
2 196 -823 -823
160 -823 -823 -823
-823 -823 254 -823
2 196 -823 -823
2 96 -823 2
-823 -823 196 2
```



74203Suppl emental \_CNSmatri ces. pssm. txt

|      |      |      |      |
|------|------|------|------|
| -823 | -823 | -823 | 160  |
| 160  | -823 | -823 | -823 |
| 2    | 96   | -823 | 2    |
| 160  | -823 | -823 | -823 |
| 2    | -823 | 196  | -823 |
| -823 | -823 | -823 | 160  |
| -823 | -823 | -823 | 160  |
| 43   | 119  | -158 | -158 |
| -823 | -823 | -823 | 160  |
| -823 | -823 | 254  | -823 |

ALPHABET= ACGT

>srsc11\_024. 2

log-odds matrix: al ength= 4 w= 11 n= 1153 bayes= 8. 58246 E= 4. 1e+004

|      |      |      |      |
|------|------|------|------|
| -823 | -823 | -823 | 160  |
| -823 | 254  | -823 | -823 |
| 160  | -823 | -823 | -823 |
| 160  | -823 | -823 | -823 |
| 160  | -823 | -823 | -823 |
| 160  | -823 | -823 | -823 |
| -823 | 254  | -823 | -823 |
| 2    | 96   | -823 | 2    |
| -158 | -158 | 208  | -158 |
| -823 | 96   | -823 | 102  |
| -823 | 254  | -823 | -823 |

ALPHABET= ACGT

>srsc11\_024. 3

log-odds matrix: al ength= 4 w= 10 n= 1156 bayes= 8. 58621 E= 9. 0e+004

|      |      |      |      |
|------|------|------|------|
| -823 | -823 | 254  | -823 |
| -823 | 96   | -823 | 102  |
| 124  | -158 | -158 | -158 |
| 2    | -823 | -823 | 102  |
| -823 | -823 | -823 | 160  |
| -823 | -823 | 254  | -823 |
| -823 | -823 | 254  | -823 |
| -823 | -823 | -823 | 160  |
| -823 | -823 | -823 | 160  |
| -823 | -823 | -823 | 160  |

ALPHABET= ACGT

>srsc12\_003. 1

log-odds matrix: al ength= 4 w= 21 n= 1518 bayes= 8. 24127 E= 7. 2e+002

|      |      |      |      |
|------|------|------|------|
| -897 | -897 | -897 | 182  |
| -897 | 187  | -12  | -897 |
| 182  | -897 | -897 | -897 |
| -897 | 146  | -897 | 50   |
| -897 | -12  | -897 | 150  |
| 150  | -897 | -12  | -897 |
| -897 | -12  | 146  | -49  |
| -897 | 87   | -897 | 109  |
| -897 | -897 | -897 | 182  |
| -897 | -12  | -12  | 109  |
| -49  | -897 | -897 | 150  |
| -49  | -12  | 146  | -897 |
| -897 | -897 | -897 | 182  |
| -897 | 87   | -897 | 109  |
| -897 | -897 | -12  | 150  |
| -897 | -12  | -897 | 150  |
| 50   | 146  | -897 | -897 |

74203Suppl emental \_CNSmatri ces. pssm. txt

|      |      |      |     |
|------|------|------|-----|
| 109  | -897 | -897 | 50  |
| -897 | -897 | -897 | 182 |
| 50   | -897 | -897 | 109 |
| -897 | -897 | -897 | 182 |

ALPHABET= ACGT

>srsc12\_006. 3

log-odds matrix: alength= 4 w= 11 n= 1001 bayes= 8. 37793 E= 3. 3e+006

|      |      |      |      |
|------|------|------|------|
| -823 | -823 | 227  | -823 |
| -158 | 183  | -158 | -158 |
| 55   | -158 | 96   | -158 |
| 18   | -823 | 169  | -823 |
| -823 | 169  | 69   | -823 |
| 138  | -158 | -158 | -158 |
| -58  | 119  | -58  | -58  |
| -823 | -823 | -823 | 177  |
| -823 | -823 | 227  | -823 |
| 138  | -158 | -158 | -158 |
| 177  | -823 | -823 | -823 |

ALPHABET= ACGT

>srsc12\_007. 1

log-odds matrix: alength= 4 w= 16 n= 1025 bayes= 8. 99859 E= 2. 5e+004

|      |      |      |      |
|------|------|------|------|
| -765 | -765 | -765 | 175  |
| -765 | -765 | 229  | -765 |
| 75   | -765 | -765 | 75   |
| 175  | -765 | -765 | -765 |
| -765 | -765 | -765 | 175  |
| -765 | -765 | 229  | -765 |
| -765 | -765 | 229  | -765 |
| -765 | -765 | -765 | 175  |
| -765 | -765 | 229  | -765 |
| 75   | -765 | 129  | -765 |
| -765 | -765 | 129  | 75   |
| -765 | -765 | 229  | -765 |
| 175  | -765 | -765 | -765 |
| -765 | -765 | -765 | 175  |
| -765 | -765 | 229  | -765 |
| 175  | -765 | -765 | -765 |

ALPHABET= ACGT

>srsc12\_007. 3

log-odds matrix: alength= 4 w= 11 n= 1035 bayes= 9. 01262 E= 4. 9e+004

|      |      |      |      |
|------|------|------|------|
| 175  | -765 | -765 | -765 |
| 175  | -765 | -765 | -765 |
| 175  | -765 | -765 | -765 |
| 175  | -765 | -765 | -765 |
| -765 | -765 | 229  | -765 |
| -765 | -765 | -765 | 175  |
| 175  | -765 | -765 | -765 |
| -765 | -765 | 129  | 75   |
| -765 | -765 | -765 | 175  |
| -765 | -765 | 229  | -765 |
| -765 | 229  | -765 | -765 |

ALPHABET= ACGT

>srsc12\_007. 5

log-odds matrix: alength= 4 w= 11 n= 1035 bayes= 9. 01262 E= 8. 4e+004

|      |      |     |      |
|------|------|-----|------|
| -765 | -765 | 229 | -765 |
|------|------|-----|------|

74203Suppl emental \_CNSmatri ces. pssm. txt

|      |      |      |      |
|------|------|------|------|
| 75   | 129  | -765 | -765 |
| -765 | 229  | -765 | -765 |
| -765 | -765 | -765 | 175  |
| 175  | -765 | -765 | -765 |
| -765 | -765 | -765 | 175  |
| -765 | -765 | 229  | -765 |
| 75   | -765 | 129  | -765 |
| -765 | -765 | 129  | 75   |
| 175  | -765 | -765 | -765 |
| -765 | -765 | 229  | -765 |

ALPHABET= ACGT

>srsc12\_007. 6

log-odds matrix: al ength= 4 w= 11 n= 1035 bayes= 9. 01262 E= 9. 1e+004

|      |      |      |      |
|------|------|------|------|
| -765 | -765 | -765 | 175  |
| -765 | -765 | -765 | 175  |
| 175  | -765 | -765 | -765 |
| -765 | -765 | 129  | 75   |
| 175  | -765 | -765 | -765 |
| 75   | -765 | -765 | 75   |
| -765 | -765 | 229  | -765 |
| -765 | 229  | -765 | -765 |
| 175  | -765 | -765 | -765 |
| -765 | -765 | -765 | 175  |
| -765 | 229  | -765 | -765 |

ALPHABET= ACGT

>srsc12\_007. 7

log-odds matrix: al ength= 4 w= 11 n= 1035 bayes= 9. 01262 E= 9. 5e+004

|      |      |      |      |
|------|------|------|------|
| -765 | 229  | -765 | -765 |
| 75   | 129  | -765 | -765 |
| -765 | -765 | -765 | 175  |
| 175  | -765 | -765 | -765 |
| -765 | -765 | 229  | -765 |
| -765 | 129  | -765 | 75   |
| 175  | -765 | -765 | -765 |
| -765 | 129  | 129  | -765 |
| 175  | -765 | -765 | -765 |
| -765 | -765 | -765 | 175  |
| -765 | -765 | 229  | -765 |

ALPHABET= ACGT

>srsc12\_007. 8

log-odds matrix: al ength= 4 w= 11 n= 1035 bayes= 9. 01262 E= 1. 6e+005

|      |      |      |      |
|------|------|------|------|
| 175  | -765 | -765 | -765 |
| -765 | -765 | 229  | -765 |
| 75   | -765 | -765 | 75   |
| 175  | -765 | -765 | -765 |
| -765 | 129  | -765 | 75   |
| 175  | -765 | -765 | -765 |
| -765 | -765 | 229  | -765 |
| 175  | -765 | -765 | -765 |
| 175  | -765 | -765 | -765 |
| 112  | -99  | -99  | -99  |
| -765 | 229  | -765 | -765 |

ALPHABET= ACGT

>srsc12\_007. 9

log-odds matrix: al ength= 4 w= 10 n= 1037 bayes= 9. 01542 E= 1. 5e+005

74203Suppl emental \_CNSmatri ces. pssm. txt

```
-765 229 -765 -765
 75 129 -765 -765
 75 -765 129 -765
 175 -765 -765 -765
-765 -765 229 -765
 175 -765 -765 -765
-765 -765 -765 175
-765 -765 -765 175
-765 -765 -765 175
 175 -765 -765 -765
```

ALPHABET= ACGT

>srsc12\_023. 2

log-odds matrix: al ength= 4 w= 10 n= 635 bayes= 8. 30606 E= 6. 5e+003

```
-765 224 -765 -765
 178 -765 -765 -765
 178 -765 -765 -765
-765 224 -765 -765
 178 -765 -765 -765
 178 -765 -765 -765
 178 -765 -765 -765
-765 -765 -765 178
-765 224 -765 -765
-765 224 -765 -765
```

ALPHABET= ACGT

>srsc12\_023. 3

log-odds matrix: al ength= 4 w= 21 n= 613 bayes= 8. 25503 E= 1. 6e+004

```
-765 -765 224 -765
-765 -765 -765 178
 178 -765 -765 -765
-765 -765 -765 178
-765 -765 -765 178
 79 124 -765 -765
-765 -765 -765 178
-765 -765 -765 178
-765 -765 -765 178
-765 -765 -765 178
-765 224 -765 -765
 178 -765 -765 -765
-765 124 -765 79
-765 124 -765 79
-765 224 -765 -765
-765 224 -765 -765
 178 -765 -765 -765
-765 -765 -765 178
-765 -765 -765 178
-765 -765 -765 178
-765 -765 -765 178
```

ALPHABET= ACGT

>srsc12\_023. 4

log-odds matrix: al ength= 4 w= 21 n= 613 bayes= 8. 25503 E= 1. 7e+004

```
-765 -765 224 -765
-765 -765 -765 178
 178 -765 -765 -765
 178 -765 -765 -765
 178 -765 -765 -765
-765 -765 -765 178
 178 -765 -765 -765
```

74203Suppl emental \_CNSmatri ces. pssm. txt

|      |      |      |      |
|------|------|------|------|
| -765 | 124  | 124  | -765 |
| -765 | 124  | -765 | 79   |
| -765 | -765 | -765 | 178  |
| 178  | -765 | -765 | -765 |
| 178  | -765 | -765 | -765 |
| 178  | -765 | -765 | -765 |
| -765 | -765 | -765 | 178  |
| -765 | -765 | 224  | -765 |
| -765 | -765 | 124  | 79   |
| -765 | -765 | -765 | 178  |
| 178  | -765 | -765 | -765 |
| -765 | 224  | -765 | -765 |
| 178  | -765 | -765 | -765 |
| -765 | -765 | -765 | 178  |

ALPHABET= ACGT

>srs12\_024. 3

log-odds matrix: al engh= 4 w= 12 n= 595 bayes= 8. 21189 E= 3. 7e+004

|      |      |      |      |
|------|------|------|------|
| -765 | 211  | -765 | -765 |
| 189  | -765 | -765 | -765 |
| -765 | -765 | -765 | 189  |
| -765 | -765 | -765 | 189  |
| -765 | 211  | -765 | -765 |
| -765 | 111  | -765 | 89   |
| 89   | -765 | -765 | 89   |
| -765 | -765 | -765 | 189  |
| -765 | 211  | -765 | -765 |
| 189  | -765 | -765 | -765 |
| -765 | -765 | -765 | 189  |
| -765 | -765 | -765 | 189  |

ALPHABET= ACGT

>srs2\_002. 1

log-odds matrix: al engh= 4 w= 24 n= 1908 bayes= 8. 89482 E= 1. 3e+000

|      |      |      |      |
|------|------|------|------|
| -865 | 32   | -865 | 132  |
| -865 | 190  | -865 | -26  |
| 132  | -865 | 32   | -865 |
| 174  | -865 | -865 | -865 |
| -865 | 231  | -865 | -865 |
| -865 | 231  | -865 | -865 |
| -26  | -865 | -865 | 132  |
| 74   | 32   | -865 | -26  |
| -865 | -865 | -865 | 174  |
| -865 | -865 | 231  | -865 |
| -865 | 32   | -865 | 132  |
| -865 | -865 | -865 | 174  |
| -865 | -865 | 231  | -865 |
| 174  | -865 | -865 | -865 |
| -865 | 231  | -865 | -865 |
| -199 | -199 | -199 | 146  |
| 132  | -865 | 32   | -865 |
| -26  | -865 | 190  | -865 |
| 174  | -865 | -865 | -865 |
| -865 | 32   | 132  | -26  |
| -865 | -865 | 132  | 74   |
| 174  | -865 | -865 | -865 |
| -865 | 190  | 32   | -865 |
| -865 | 190  | -865 | -26  |

ALPHABET= ACGT

74203Suppl emental \_CNSmatri ces. pssm. txt

>srsc2\_002. 2

log-odds matrix: alength= 4 w= 29 n= 1888 bayes= 8. 87958 E= 5. 9e+003

|      |      |      |      |
|------|------|------|------|
| -865 | 190  | 32   | -865 |
| -26  | 132  | -865 | -26  |
| -865 | -865 | -865 | 174  |
| -865 | -865 | 231  | -865 |
| -865 | 132  | -865 | 74   |
| -26  | 132  | -865 | -26  |
| -26  | -865 | -865 | 132  |
| -865 | 190  | 32   | -865 |
| 146  | -199 | -199 | -199 |
| -865 | -865 | -865 | 174  |
| -865 | 231  | -865 | -865 |
| 74   | -865 | 132  | -865 |
| -865 | 32   | 190  | -865 |
| -26  | -865 | 132  | -26  |
| -26  | -865 | 132  | -26  |
| -26  | -865 | 190  | -865 |
| 74   | 32   | 32   | -865 |
| 174  | -865 | -865 | -865 |
| 74   | 32   | -865 | -26  |
| -865 | -865 | 32   | 132  |
| -865 | 132  | 132  | -865 |
| 174  | -865 | -865 | -865 |
| 174  | -865 | -865 | -865 |
| -865 | 132  | 32   | -26  |
| -865 | 132  | -865 | 74   |
| -865 | -865 | -865 | 174  |
| -865 | 32   | 132  | -26  |
| -865 | 32   | 190  | -865 |
| -865 | -865 | -865 | 174  |

ALPHABET= ACGT

>srsc2\_002. 3

log-odds matrix: alength= 4 w= 11 n= 1960 bayes= 8. 93369 E= 5. 4e+004

|      |      |      |      |
|------|------|------|------|
| -865 | 190  | 32   | -865 |
| -26  | -865 | -865 | 132  |
| 132  | -865 | 32   | -865 |
| -865 | -865 | -865 | 174  |
| -865 | 231  | -865 | -865 |
| -199 | -199 | -199 | 146  |
| -865 | -865 | 231  | -865 |
| -865 | 32   | -865 | 132  |
| -865 | -865 | -865 | 174  |
| 174  | -865 | -865 | -865 |
| -865 | -865 | 231  | -865 |

ALPHABET= ACGT

>srsc2\_002. 5

log-odds matrix: alength= 4 w= 10 n= 1964 bayes= 8. 93664 E= 9. 2e+004

|      |      |      |      |
|------|------|------|------|
| -865 | -865 | -865 | 174  |
| -865 | 231  | -865 | -865 |
| -865 | 231  | -865 | -865 |
| 132  | -865 | -865 | -26  |
| -26  | -865 | 132  | -26  |
| -26  | -865 | -865 | 132  |
| -865 | -865 | -865 | 174  |
| -865 | -865 | -865 | 174  |
| -865 | -865 | -865 | 174  |
| -865 | -865 | 231  | -865 |

ALPHABET= ACGT

&gt;srsc2\_002. 6

log-odds matrix: alength= 4 w= 10 n= 1964 bayes= 8.93664 E= 4.6e+005

|      |      |      |      |
|------|------|------|------|
| -865 | 190  | -865 | -26  |
| -865 | -865 | -865 | 174  |
| -26  | -865 | -865 | 132  |
| -26  | -865 | 190  | -865 |
| 174  | -865 | -865 | -865 |
| -865 | 231  | -865 | -865 |
| -865 | -865 | -865 | 174  |
| 174  | -865 | -865 | -865 |
| -865 | -865 | -865 | 174  |
| -865 | 32   | -865 | 132  |

ALPHABET= ACGT

&gt;srsc2\_002. 7

log-odds matrix: alength= 4 w= 11 n= 1960 bayes= 8.93369 E= 1.5e+006

|      |      |      |      |
|------|------|------|------|
| -865 | 231  | -865 | -865 |
| -865 | 231  | -865 | -865 |
| 132  | 32   | -865 | -865 |
| -865 | -865 | -865 | 174  |
| 132  | -865 | -865 | -26  |
| 132  | 32   | -865 | -865 |
| 174  | -865 | -865 | -865 |
| -26  | 32   | -865 | 74   |
| -26  | 190  | -865 | -865 |
| 132  | -865 | -865 | -26  |
| -865 | -865 | 231  | -865 |

ALPHABET= ACGT

&gt;srsc2\_002. 9

log-odds matrix: alength= 4 w= 11 n= 1960 bayes= 8.93369 E= 4.9e+007

|      |      |      |      |
|------|------|------|------|
| -865 | -865 | -865 | 174  |
| -26  | -865 | 132  | -26  |
| -26  | 132  | 32   | -865 |
| -865 | -865 | -865 | 174  |
| 174  | -865 | -865 | -865 |
| -865 | -865 | -865 | 174  |
| -26  | 190  | -865 | -865 |
| 12   | 145  | -199 | -199 |
| -865 | -865 | -865 | 174  |
| 132  | 32   | -865 | -865 |
| -865 | 190  | -865 | -26  |

ALPHABET= ACGT

&gt;srsc2\_007. 10

log-odds matrix: alength= 4 w= 10 n= 1466 bayes= 8.51373 E= 5.1e+006

|      |      |      |      |
|------|------|------|------|
| -865 | -865 | -865 | 168  |
| -865 | -865 | -865 | 168  |
| 68   | 140  | -865 | -865 |
| -865 | -865 | 41   | 127  |
| -865 | 41   | -865 | 127  |
| 168  | -865 | -865 | -865 |
| -865 | -865 | 240  | -865 |
| -32  | -865 | -865 | 127  |
| -865 | -865 | 41   | 127  |
| -865 | -865 | -865 | 168  |

ALPHABET= ACGT

&gt;srsc2\_007.1

log-odds matrix: alength= 4 w= 29 n= 1390 bayes= 8.43671 E= 1.5e+001

|      |      |      |      |
|------|------|------|------|
| 168  | -865 | -865 | -865 |
| 168  | -865 | -865 | -865 |
| -865 | 41   | 199  | -865 |
| 68   | -865 | -865 | 68   |
| 127  | -865 | -865 | -32  |
| 68   | 41   | 41   | -865 |
| -865 | -865 | -865 | 168  |
| -865 | -865 | 240  | -865 |
| -32  | -865 | 41   | 68   |
| 127  | -865 | -865 | -32  |
| -865 | -865 | 199  | -32  |
| -865 | 41   | 140  | -32  |
| -32  | 41   | 41   | -32  |
| -865 | 140  | -865 | 68   |
| -865 | 199  | -865 | -32  |
| -865 | -865 | -865 | 168  |
| -32  | -865 | -865 | 127  |
| -865 | 41   | -865 | 127  |
| -865 | 240  | -865 | -865 |
| -865 | -865 | -865 | 168  |
| -865 | -865 | 240  | -865 |
| -865 | 240  | -865 | -865 |
| 68   | -865 | -865 | 68   |
| 168  | -865 | -865 | -865 |
| -32  | -865 | 140  | -32  |
| 127  | -865 | -865 | -32  |
| -865 | -865 | 240  | -865 |
| -32  | -865 | -865 | 127  |
| 168  | -865 | -865 | -865 |

ALPHABET= ACGT

&gt;srsc2\_007.2

log-odds matrix: alength= 4 w= 29 n= 1390 bayes= 8.43671 E= 1.5e+001

|      |      |      |      |
|------|------|------|------|
| -865 | -865 | 240  | -865 |
| -865 | 41   | 41   | 68   |
| -865 | -865 | 199  | -32  |
| -32  | 199  | -865 | -865 |
| -32  | -865 | -865 | 127  |
| -32  | 41   | -865 | 68   |
| -865 | 41   | -865 | 127  |
| -865 | -865 | 240  | -865 |
| -865 | -865 | 240  | -865 |
| 168  | -865 | -865 | -865 |
| -865 | -865 | -865 | 168  |
| -865 | -865 | -865 | 168  |
| -865 | -865 | -865 | 168  |
| -865 | 41   | 199  | -865 |
| -865 | -865 | -865 | 168  |
| 68   | 41   | 41   | -865 |
| -865 | -865 | -865 | 168  |
| -32  | -865 | 140  | -32  |
| -32  | 140  | -865 | -32  |
| -32  | 140  | -865 | -32  |
| 127  | -865 | -865 | -32  |
| 127  | -865 | 41   | -865 |
| -865 | 140  | 140  | -865 |
| 7    | -199 | 65   | 7    |
| -32  | -865 | 199  | -865 |
| 127  | -865 | 41   | -865 |



74203Suppl emental \_CNSmatri ces. pssm. txt

|      |      |     |      |
|------|------|-----|------|
| -865 | -865 | 240 | -865 |
| 127  | -865 | 41  | -865 |
| -865 | -865 | 240 | -865 |

ALPHABET= ACGT

>srsc2\_007.3

log-odds matrix: alength= 4 w= 14 n= 1450 bayes= 8.49785 E= 1.1e+003

|      |      |      |      |
|------|------|------|------|
| -865 | -865 | -865 | 168  |
| -199 | 65   | 65   | 7    |
| -865 | -865 | -865 | 168  |
| -865 | 140  | -865 | 68   |
| -865 | -865 | -865 | 168  |
| -865 | -865 | 240  | -865 |
| -865 | -865 | -865 | 168  |
| -865 | -865 | -865 | 168  |
| -865 | 199  | 41   | -865 |
| 168  | -865 | -865 | -865 |
| 168  | -865 | -865 | -865 |
| 168  | -865 | -865 | -865 |
| -32  | -865 | -865 | 127  |
| -865 | -865 | -865 | 168  |

ALPHABET= ACGT

>srsc2\_007.5

log-odds matrix: alength= 4 w= 11 n= 1462 bayes= 8.50978 E= 1.3e+005

|      |      |      |      |
|------|------|------|------|
| -865 | -865 | 240  | -865 |
| -32  | -865 | -865 | 127  |
| -865 | -865 | 240  | -865 |
| 168  | -865 | -865 | -865 |
| 127  | -865 | 41   | -865 |
| -865 | -865 | -865 | 168  |
| 168  | -865 | -865 | -865 |
| -32  | -865 | -865 | 127  |
| -865 | -865 | -865 | 168  |
| 89   | -199 | -199 | 7    |
| 168  | -865 | -865 | -865 |

ALPHABET= ACGT

>srsc2\_007.6

log-odds matrix: alength= 4 w= 10 n= 1466 bayes= 8.51373 E= 1.4e+005

|      |      |      |      |
|------|------|------|------|
| -865 | -865 | -865 | 168  |
| 68   | -865 | 41   | -32  |
| -865 | 199  | -865 | -32  |
| -865 | -865 | -865 | 168  |
| -865 | -865 | -865 | 168  |
| 168  | -865 | -865 | -865 |
| -865 | 240  | -865 | -865 |
| 168  | -865 | -865 | -865 |
| 68   | -865 | 140  | -865 |
| -865 | -865 | -865 | 168  |

ALPHABET= ACGT

>srsc2\_007.8

log-odds matrix: alength= 4 w= 10 n= 1466 bayes= 8.51373 E= 6.8e+005

|      |      |      |      |
|------|------|------|------|
| -865 | -865 | 240  | -865 |
| -865 | 199  | 41   | -865 |
| 168  | -865 | -865 | -865 |
| 127  | -865 | 41   | -865 |
| -32  | -865 | -865 | 127  |

74203Suppl emental \_CNSmatri ces. pssm. txt

|      |      |      |      |
|------|------|------|------|
| -865 | -865 | 240  | -865 |
| -865 | 199  | 41   | -865 |
| -865 | 41   | -865 | 127  |
| -865 | 41   | 41   | 68   |
| 168  | -865 | -865 | -865 |

ALPHABET= ACGT

>srsc2\_011.1

log-odds matrix: alength= 4 w= 15 n= 774 bayes= 8.59246 E= 1.1e+003

|      |      |      |      |
|------|------|------|------|
| -765 | -765 | 222  | -765 |
| -765 | -765 | -765 | 180  |
| 180  | -765 | -765 | -765 |
| -765 | 222  | -765 | -765 |
| 180  | -765 | -765 | -765 |
| -765 | 222  | -765 | -765 |
| -765 | 222  | -765 | -765 |
| 180  | -765 | -765 | -765 |
| -765 | -765 | -765 | 180  |
| -765 | -765 | 222  | -765 |
| -765 | -765 | 222  | -765 |
| -765 | -765 | -765 | 180  |
| 180  | -765 | -765 | -765 |
| -765 | -765 | 222  | -765 |
| -765 | -765 | 222  | -765 |

ALPHABET= ACGT

>srsc2\_011.2

log-odds matrix: alength= 4 w= 24 n= 756 bayes= 8.55842 E= 3.1e+003

|      |      |      |      |
|------|------|------|------|
| -765 | 222  | -765 | -765 |
| 180  | -765 | -765 | -765 |
| -765 | -765 | 222  | -765 |
| -765 | -765 | -765 | 180  |
| 80   | -765 | -765 | 80   |
| 180  | -765 | -765 | -765 |
| -765 | -765 | 222  | -765 |
| -765 | -765 | -765 | 180  |
| -765 | 222  | -765 | -765 |
| 180  | -765 | -765 | -765 |
| 180  | -765 | -765 | -765 |
| -765 | -765 | 222  | -765 |
| -765 | -765 | -765 | 180  |
| 180  | -765 | -765 | -765 |
| -765 | -765 | 222  | -765 |
| -765 | 122  | -765 | 80   |
| -765 | 222  | -765 | -765 |
| 180  | -765 | -765 | -765 |
| -765 | -765 | -765 | 180  |
| -765 | -765 | 222  | -765 |
| 80   | -765 | 122  | -765 |
| -765 | -765 | 222  | -765 |
| 180  | -765 | -765 | -765 |
| -765 | -765 | -765 | 180  |

ALPHABET= ACGT

>srsc2\_011.5

log-odds matrix: alength= 4 w= 14 n= 776 bayes= 8.59619 E= 6.0e+004

|      |      |      |      |
|------|------|------|------|
| 180  | -765 | -765 | -765 |
| -765 | -765 | -765 | 180  |
| 180  | -765 | -765 | -765 |
| -765 | -765 | -765 | 180  |

74203Suppl emental \_CNSmatri ces. pssm. txt

|      |      |      |      |
|------|------|------|------|
| -765 | -765 | -765 | 180  |
| -765 | -765 | -765 | 180  |
| -765 | -765 | -765 | 180  |
| -765 | -765 | -765 | 180  |
| 180  | -765 | -765 | -765 |
| -765 | 122  | -765 | 80   |
| -765 | -765 | -765 | 180  |
| -765 | 222  | -765 | -765 |
| -765 | -765 | -765 | 180  |
| 180  | -765 | -765 | -765 |

ALPHABET= ACGT

>srsc2\_011. 7

log-odds matrix: al ength= 4 w= 13 n= 778 bayes= 8. 59991 E= 7. 8e+004

|      |      |      |      |
|------|------|------|------|
| -765 | -765 | -765 | 180  |
| -765 | 222  | -765 | -765 |
| 180  | -765 | -765 | -765 |
| -765 | 222  | -765 | -765 |
| 180  | -765 | -765 | -765 |
| 80   | -765 | -765 | 80   |
| -765 | -765 | -765 | 180  |
| 80   | 122  | -765 | -765 |
| -765 | -765 | -765 | 180  |
| -765 | -765 | -765 | 180  |
| -765 | 122  | -765 | 80   |
| -765 | 222  | -765 | -765 |
| 180  | -765 | -765 | -765 |

ALPHABET= ACGT

>srsc2\_011. 8

log-odds matrix: al ength= 4 w= 10 n= 784 bayes= 8. 61102 E= 1. 5e+005

|      |      |      |      |
|------|------|------|------|
| 180  | -765 | -765 | -765 |
| -765 | 222  | -765 | -765 |
| 180  | -765 | -765 | -765 |
| 80   | 122  | -765 | -765 |
| 180  | -765 | -765 | -765 |
| -765 | 122  | 122  | -765 |
| -765 | 122  | -765 | 80   |
| -765 | -765 | -765 | 180  |
| 180  | -765 | -765 | -765 |
| -765 | -765 | -765 | 180  |

ALPHABET= ACGT

>srsc2\_011. 9

log-odds matrix: al ength= 4 w= 11 n= 782 bayes= 8. 60733 E= 9. 9e+004

|      |      |      |      |
|------|------|------|------|
| 180  | -765 | -765 | -765 |
| -765 | 122  | 122  | -765 |
| 180  | -765 | -765 | -765 |
| -765 | -765 | 122  | 80   |
| 80   | -765 | -765 | 80   |
| 180  | -765 | -765 | -765 |
| -765 | 222  | -765 | -765 |
| 180  | -765 | -765 | -765 |
| 180  | -765 | -765 | -765 |
| -765 | -765 | 222  | -765 |
| -765 | -765 | -765 | 180  |

ALPHABET= ACGT

>srsc2\_012. 1

74203Suppl emental \_CNSmatri ces. pssm. txt

log-odds matrix: al length= 4 w= 10 n= 1313 bayes= 8. 35425 E= 9. 8e+003

|      |      |      |      |
|------|------|------|------|
| -865 | -865 | -865 | 190  |
| -865 | -865 | 210  | -865 |
| 149  | 10   | -865 | -865 |
| 190  | -865 | -865 | -865 |
| -865 | -865 | -865 | 190  |
| -10  | -865 | 169  | -865 |
| -865 | 110  | -865 | 90   |
| 190  | -865 | -865 | -865 |
| -865 | 210  | -865 | -865 |
| 190  | -865 | -865 | -865 |

ALPHABET= ACGT

>srsc2\_012. 3

log-odds matrix: al length= 4 w= 10 n= 1313 bayes= 8. 35425 E= 1. 1e+011

|      |      |      |      |
|------|------|------|------|
| 161  | -199 | -199 | -199 |
| 161  | -199 | -199 | -199 |
| -100 | 65   | -100 | 52   |
| -199 | -199 | -199 | 161  |
| -199 | -199 | 179  | -199 |
| 25   | 40   | 40   | -199 |
| 52   | -100 | -100 | 52   |
| 25   | 126  | -199 | -199 |
| 161  | -199 | -199 | -199 |
| 161  | -199 | -199 | -199 |

ALPHABET= ACGT

>srsc2\_014. 1

log-odds matrix: al length= 4 w= 39 n= 1244 bayes= 8. 27612 E= 3. 8e-007

|      |      |      |      |
|------|------|------|------|
| -865 | -865 | -865 | 179  |
| -865 | 24   | 183  | -865 |
| -865 | -865 | -865 | 179  |
| 79   | -865 | 124  | -865 |
| 137  | -865 | -865 | -21  |
| -21  | 183  | -865 | -865 |
| 79   | -865 | -865 | 79   |
| -865 | -865 | -865 | 179  |
| -21  | 24   | -865 | 79   |
| -865 | -865 | -865 | 179  |
| -865 | -865 | 224  | -865 |
| -865 | -865 | -865 | 179  |
| -865 | -865 | 224  | -865 |
| -865 | -865 | -865 | 179  |
| -865 | -865 | -865 | 179  |
| -865 | -865 | -865 | 179  |
| -865 | 24   | 24   | 79   |
| -865 | -865 | -865 | 179  |
| 137  | -865 | 24   | -865 |
| -865 | -865 | 24   | 137  |
| -865 | -865 | -865 | 179  |
| 179  | -865 | -865 | -865 |
| -865 | -865 | 24   | 137  |
| -865 | -865 | -865 | 179  |
| -865 | -865 | -865 | 179  |
| -865 | 24   | -865 | 137  |
| -865 | -865 | 183  | -21  |
| 79   | -865 | 124  | -865 |
| -865 | 24   | -865 | 137  |
| 137  | -865 | 24   | -865 |
| 79   | 24   | 24   | -865 |
| -865 | -865 | -865 | 179  |

74203Suppl emental \_CNSmatri ces. pssm. txt

|      |      |      |      |
|------|------|------|------|
| -865 | -865 | 24   | 137  |
| -865 | 24   | 183  | -865 |
| -865 | -865 | -865 | 179  |
| -865 | -865 | 224  | -865 |
| -21  | 183  | -865 | -865 |
| -865 | -865 | -865 | 179  |
| -865 | -865 | 224  | -865 |

ALPHABET= ACGT

>srsc2\_014. 2

log-odds matrix: alength= 4 w= 10 n= 1360 bayes= 8. 40514 E= 2. 0e+003

|      |      |      |      |
|------|------|------|------|
| -865 | -865 | 224  | -865 |
| -865 | -865 | -865 | 179  |
| 179  | -865 | -865 | -865 |
| 179  | -865 | -865 | -865 |
| -865 | -865 | 224  | -865 |
| -21  | -865 | -865 | 137  |
| -865 | -865 | -865 | 179  |
| 179  | -865 | -865 | -865 |
| -199 | 193  | -199 | -199 |
| -865 | -865 | -865 | 179  |

ALPHABET= ACGT

>srsc2\_014. 3

log-odds matrix: alength= 4 w= 16 n= 1336 bayes= 8. 37938 E= 6. 2e+007

|      |      |      |      |
|------|------|------|------|
| -199 | 193  | -199 | -199 |
| -199 | 139  | -199 | 16   |
| -21  | 24   | 124  | -865 |
| -865 | -865 | -865 | 179  |
| 98   | -199 | 52   | -199 |
| -865 | 24   | -865 | 137  |
| 79   | 24   | -865 | -21  |
| 179  | -865 | -865 | -865 |
| -865 | -865 | 124  | 79   |
| 79   | -865 | 124  | -865 |
| -865 | -865 | 24   | 137  |
| 179  | -865 | -865 | -865 |
| -865 | -865 | 183  | -21  |
| 79   | -865 | 24   | -21  |
| -865 | -865 | -865 | 179  |
| 179  | -865 | -865 | -865 |

ALPHABET= ACGT

>srsc2\_014. 4

log-odds matrix: alength= 4 w= 11 n= 1356 bayes= 8. 40088 E= 7. 9e+008

|      |      |      |      |
|------|------|------|------|
| -199 | -199 | 193  | -199 |
| -199 | -199 | -199 | 151  |
| -199 | -199 | 193  | -199 |
| -199 | -199 | 193  | -199 |
| -199 | -199 | -199 | 151  |
| -199 | -199 | -199 | 151  |
| -199 | -199 | -199 | 151  |
| 98   | -199 | 52   | -199 |
| 151  | -199 | -199 | -199 |
| -865 | -865 | -865 | 179  |
| -865 | -865 | 224  | -865 |

ALPHABET= ACGT

>srsc2\_014. 5

74203Suppl emental \_CNSmatri ces. pssm. txt

log-odds matrix: alength= 4 w= 11 n= 1356 bayes= 8.40088 E= 8.6e+005

|      |      |      |      |
|------|------|------|------|
| -865 | 224  | -865 | -865 |
| -865 | -865 | -865 | 179  |
| -865 | 183  | -865 | -21  |
| -21  | -865 | 24   | 79   |
| -865 | 24   | -865 | 137  |
| 79   | -865 | 124  | -865 |
| -865 | -865 | -865 | 179  |
| 137  | -865 | 24   | -865 |
| -865 | 124  | -865 | 79   |
| -865 | 224  | -865 | -865 |
| -865 | -865 | -865 | 179  |

ALPHABET= ACGT

>srsc2\_016.1

log-odds matrix: alength= 4 w= 10 n= 1133 bayes= 8.14083 E= 1.2e+005

|      |      |      |      |
|------|------|------|------|
| -865 | -865 | 222  | -865 |
| -19  | -865 | 122  | -19  |
| -865 | -865 | 222  | -865 |
| 180  | -865 | -865 | -865 |
| -19  | -865 | 181  | -865 |
| -865 | 22   | -865 | 139  |
| -865 | -865 | -865 | 180  |
| -865 | -865 | -865 | 180  |
| 139  | -865 | -865 | -19  |
| -865 | 181  | -865 | -19  |

ALPHABET= ACGT

>srsc2\_016.5

log-odds matrix: alength= 4 w= 12 n= 1125 bayes= 8.13057 E= 1.8e+010

|      |      |      |      |
|------|------|------|------|
| 152  | -199 | -199 | -199 |
| -199 | 190  | -199 | -199 |
| 100  | -199 | 50   | -199 |
| -199 | -199 | 190  | -199 |
| -199 | 50   | -199 | 100  |
| -199 | -199 | -199 | 152  |
| -199 | -199 | 190  | -199 |
| 17   | 50   | -199 | 17   |
| 17   | -199 | -199 | 100  |
| -199 | 190  | -199 | -199 |
| 100  | -199 | 50   | -199 |
| -199 | -199 | 190  | -199 |

ALPHABET= ACGT

>srsc2\_018.1

log-odds matrix: alength= 4 w= 10 n= 966 bayes= 7.90989 E= 5.6e+002

|      |      |      |      |
|------|------|------|------|
| -865 | -865 | 209  | -865 |
| 150  | 9    | -865 | -865 |
| 150  | -865 | -865 | -8   |
| 191  | -865 | -865 | -865 |
| -865 | 209  | -865 | -865 |
| -865 | 209  | -865 | -865 |
| 191  | -865 | -865 | -865 |
| 191  | -865 | -865 | -865 |
| -8   | -865 | 167  | -865 |
| -865 | -865 | 209  | -865 |

ALPHABET= ACGT

>srsc2\_018.2

74203Suppl emental \_CNSmatri ces. pssm. txt

log-odds matrix: alength= 4 w= 11 n= 962 bayes= 7.90388 E= 1.8e+010

|      |      |      |      |
|------|------|------|------|
| -199 | 178  | -199 | -199 |
| 162  | -199 | -199 | -199 |
| 162  | -199 | -199 | -199 |
| -199 | -199 | 178  | -199 |
| 25   | -199 | -199 | 109  |
| -199 | 125  | -199 | 25   |
| 162  | -199 | -199 | -199 |
| -199 | -199 | -199 | 162  |
| 162  | -199 | -199 | -199 |
| 162  | -199 | -199 | -199 |
| -199 | -199 | 178  | -199 |

ALPHABET= ACGT

>srsc2\_018.4

log-odds matrix: alength= 4 w= 11 n= 962 bayes= 7.90388 E= 2.0e+010

|      |      |      |      |
|------|------|------|------|
| -199 | -199 | 178  | -199 |
| 162  | -199 | -199 | -199 |
| -199 | -199 | -199 | 162  |
| -199 | 125  | -199 | 25   |
| -199 | -199 | -199 | 162  |
| -199 | -199 | 178  | -199 |
| 109  | -199 | 39   | -199 |
| -199 | 39   | -199 | 109  |
| -199 | 178  | -199 | -199 |
| -199 | 178  | -199 | -199 |
| 162  | -199 | -199 | -199 |

ALPHABET= ACGT

>srsc2\_024.1

log-odds matrix: alength= 4 w= 18 n= 625 bayes= 7.27845 E= 2.4e-001

|      |      |      |      |
|------|------|------|------|
| 186  | -865 | -865 | -865 |
| -865 | -865 | -865 | 186  |
| -865 | 15   | -865 | 145  |
| -865 | -865 | -865 | 186  |
| -865 | -865 | -865 | 186  |
| -865 | 115  | 115  | -865 |
| -865 | 15   | -865 | 145  |
| -865 | -865 | 215  | -865 |
| -865 | -865 | 15   | 145  |
| -865 | -865 | -865 | 186  |
| -865 | -865 | -865 | 186  |
| -865 | 15   | -865 | 145  |
| -865 | 215  | -865 | -865 |
| -865 | -865 | -865 | 186  |
| -865 | -865 | -865 | 186  |
| -865 | 15   | -865 | 145  |
| -865 | -865 | -865 | 186  |
| -865 | 15   | -865 | 145  |

ALPHABET= ACGT

>srsc2\_028.1

log-odds matrix: alength= 4 w= 36 n= 333 bayes= 7.37069 E= 6.0e+002

|      |      |      |      |
|------|------|------|------|
| -765 | -765 | 224  | -765 |
| 179  | -765 | -765 | -765 |
| 179  | -765 | -765 | -765 |
| 179  | -765 | -765 | -765 |
| 179  | -765 | -765 | -765 |
| -765 | -765 | 224  | -765 |
| 79   | -765 | -765 | 79   |

74203Suppl emental \_CNSmatri ces. pssm. txt

```

179 -765 -765 -765
-765 -765 -765 179
-765 -765 124 79
179 -765 -765 -765
-765 -765 -765 179
-765 -765 224 -765
-765 -765 -765 179
-765 224 -765 -765
179 -765 -765 -765
-765 -765 224 -765
179 -765 -765 -765
-765 -765 -765 179
-765 224 -765 -765
79 -765 -765 79
-765 -765 -765 179
-765 -765 -765 179
-765 -765 -765 179
179 -765 -765 -765
179 -765 -765 -765
-765 224 -765 -765
-765 124 -765 79
-765 -765 -765 179
79 -765 -765 79
-765 -765 -765 179
-765 -765 224 -765
-765 224 -765 -765
-765 -765 -765 179
-765 -765 224 -765
-765 -765 -765 179

```

ALPHABET= ACGT

>srs2\_028. 2

log-odds matrix: alength= 4 w= 20 n= 365 bayes= 7. 50383 E= 3. 0e+003

```

-765 -765 -765 179
-765 224 -765 -765
-765 -765 -765 179
-765 224 -765 -765
-765 -765 -765 179
-765 -765 -765 179
-765 124 -765 79
-765 -765 -765 179
179 -765 -765 -765
-765 -765 -765 179
179 -765 -765 -765
-765 -765 -765 179
-765 -765 224 -765
-765 -765 -765 179
79 -765 -765 79
-765 -765 -765 179
-765 -765 224 -765
179 -765 -765 -765
-765 -765 -765 179
-765 -765 224 -765

```

ALPHABET= ACGT

>srs2\_029. 1

log-odds matrix: alength= 4 w= 33 n= 438 bayes= 7. 17991 E= 1. 3e+000

```

-823 -823 -823 180
-823 -823 -823 180
-823 -823 -823 180
22 -823 -823 122

```



74203Suppl emental \_CNSmatri ces. pssm. txt

|      |      |      |      |
|------|------|------|------|
| -158 | -158 | 92   | 58   |
| -823 | -823 | -823 | 180  |
| -823 | 163  | 64   | -823 |
| -823 | 163  | 64   | -823 |
| 180  | -823 | -823 | -823 |
| 180  | -823 | -823 | -823 |
| 22   | -823 | 163  | -823 |
| -823 | -823 | -823 | 180  |
| -823 | -823 | 64   | 122  |
| 180  | -823 | -823 | -823 |
| -823 | -823 | 222  | -823 |
| 180  | -823 | -823 | -823 |
| -823 | -823 | -823 | 180  |
| -823 | -823 | 163  | 22   |
| -823 | 163  | 64   | -823 |
| -823 | -823 | -823 | 180  |
| 22   | -823 | 163  | -823 |
| 22   | -823 | 163  | -823 |
| 22   | -823 | 163  | -823 |
| -823 | -823 | 222  | -823 |
| 180  | -823 | -823 | -823 |
| 180  | -823 | -823 | -823 |
| 180  | -823 | -823 | -823 |
| 122  | -823 | 64   | -823 |
| -823 | -823 | -823 | 180  |
| -823 | -823 | -823 | 180  |
| 22   | -823 | -823 | 122  |
| 180  | -823 | -823 | -823 |
| 180  | -823 | -823 | -823 |

ALPHABET= ACGT

>srsc2\_040. 10

log-odds matrix: alength= 4 w= 11 n= 448 bayes= 7. 8009 E= 1. 4e+004

|      |      |      |      |
|------|------|------|------|
| -765 | 252  | -765 | -765 |
| -765 | -765 | -765 | 161  |
| 61   | -765 | -765 | 61   |
| 161  | -765 | -765 | -765 |
| -765 | 252  | -765 | -765 |
| 161  | -765 | -765 | -765 |
| 61   | -765 | -765 | 61   |
| -765 | -765 | 252  | -765 |
| 161  | -765 | -765 | -765 |
| -765 | -765 | -765 | 161  |
| -765 | -765 | -765 | 161  |

ALPHABET= ACGT

>srsc2\_040. 4

log-odds matrix: alength= 4 w= 10 n= 450 bayes= 7. 80735 E= 3. 9e+003

|      |      |      |      |
|------|------|------|------|
| -765 | 252  | -765 | -765 |
| -765 | -765 | -765 | 161  |
| -765 | -765 | 252  | -765 |
| 161  | -765 | -765 | -765 |
| 161  | -765 | -765 | -765 |
| -765 | 152  | 152  | -765 |
| 61   | -765 | -765 | 61   |
| -765 | -765 | -765 | 161  |
| -765 | -765 | 252  | -765 |
| -765 | -765 | 252  | -765 |

ALPHABET= ACGT

74203Suppl emental \_CNSmatri ces. pssm. txt

>srs2\_040. 8

log-odds matrix: alength= 4 w= 12 n= 446 bayes= 7. 79442 E= 1. 1e+004

|      |      |      |      |
|------|------|------|------|
| -765 | -765 | -765 | 161  |
| 161  | -765 | -765 | -765 |
| -765 | 252  | -765 | -765 |
| 161  | -765 | -765 | -765 |
| -765 | -765 | -765 | 161  |
| 161  | -765 | -765 | -765 |
| 161  | -765 | -765 | -765 |
| -765 | -765 | -765 | 161  |
| -765 | -765 | 152  | 61   |
| -765 | 252  | -765 | -765 |
| -765 | 152  | -765 | 61   |
| -765 | 252  | -765 | -765 |

ALPHABET= ACGT

>srs3\_003. 3

log-odds matrix: alength= 4 w= 13 n= 676 bayes= 8. 3966 E= 8. 7e+003

|      |      |      |      |
|------|------|------|------|
| -765 | -765 | -765 | 177  |
| -765 | 226  | -765 | -765 |
| 177  | -765 | -765 | -765 |
| -765 | -765 | 226  | -765 |
| -765 | -765 | 226  | -765 |
| -765 | -765 | -765 | 177  |
| 177  | -765 | -765 | -765 |
| 177  | -765 | -765 | -765 |
| -765 | -765 | -765 | 177  |
| -765 | -765 | -765 | 177  |
| -765 | 126  | -765 | 78   |
| -765 | -765 | -765 | 177  |
| -765 | -765 | 226  | -765 |

ALPHABET= ACGT

>srs3\_003. 4

log-odds matrix: alength= 4 w= 12 n= 678 bayes= 8. 40088 E= 9. 6e+003

|      |      |      |      |
|------|------|------|------|
| -765 | 226  | -765 | -765 |
| -765 | -765 | -765 | 177  |
| -765 | -765 | 226  | -765 |
| 177  | -765 | -765 | -765 |
| 78   | -765 | 126  | -765 |
| 78   | -765 | 126  | -765 |
| -765 | -765 | 226  | -765 |
| -765 | -765 | 226  | -765 |
| -765 | -765 | -765 | 177  |
| 177  | -765 | -765 | -765 |
| 177  | -765 | -765 | -765 |
| -765 | -765 | 226  | -765 |

ALPHABET= ACGT

>srs3\_005. 1

log-odds matrix: alength= 4 w= 39 n= 892 bayes= 7. 47086 E= 4. 9e-007

|      |      |      |      |
|------|------|------|------|
| -897 | 229  | -897 | -897 |
| -897 | -897 | -897 | 175  |
| -897 | 156  | -897 | 43   |
| -897 | -3   | -897 | 143  |
| -897 | 156  | -897 | 43   |
| 102  | -897 | 97   | -897 |
| -897 | -897 | -897 | 175  |
| -897 | -897 | -897 | 175  |
| -897 | -897 | 97   | 102  |

74203Suppl emental \_CNSmatri ces. pssm. txt

```

-897 -897 -897 175
-57 -897 197 -897
-897 229 -897 -897
-897 -897 -897 175
143 -897 -897 -57
175 -897 -897 -897
102 -3 -897 -57
175 -897 -897 -897
-897 -3 -897 143
175 -897 -897 -897
-897 -897 -897 175
-19 -231 165 -231
-57 -897 97 43
43 -3 97 -897
-897 97 97 -57
143 -897 -3 -897
-897 97 -897 102
143 -897 -897 -57
143 -3 -897 -897
-897 -897 -3 143
63 -231 24 -19
43 -897 -897 102
-57 -897 97 43
43 -897 156 -897
-57 -897 156 -57
-897 -897 229 -897
43 -897 156 -897
-897 -897 156 43
-57 -897 -897 143
-897 -897 -897 175

```

ALPHABET= ACGT

>srsc3\_005. 2

log-odds matrix: alength= 4 w= 28 n= 947 bayes= 7. 55766 E= 5. 6e-001

```

-897 -897 -897 175
102 -897 -897 43
-57 -3 156 -897
-897 -897 -3 143
43 -897 97 -57
-897 -897 229 -897
-57 197 -897 -897
175 -897 -897 -897
-57 -897 197 -897
-897 197 -897 -57
43 -897 -3 43
143 -897 -897 -57
-897 -897 -897 175
175 -897 -897 -897
143 -897 -897 -57
-897 97 -897 102
143 -897 -3 -897
-57 197 -897 -897
-897 -3 -897 143
175 -897 -897 -897
43 97 -3 -897
102 -3 -897 -57
-57 -3 97 -57
43 156 -897 -897
175 -897 -897 -897
-57 -897 -897 143
-897 97 -897 102
175 -897 -897 -897

```

ALPHABET= ACGT

>spsc3\_005. 3

log-odds matrix: alength= 4 w= 21 n= 982 bayes= 7. 61029 E= 3. 8e+011

|      |      |      |      |
|------|------|------|------|
| -231 | 24   | 165  | -231 |
| -231 | 165  | -231 | -19  |
| -231 | -231 | -231 | 153  |
| -231 | -231 | -231 | 153  |
| -19  | 24   | -231 | 63   |
| 153  | -231 | -231 | -231 |
| -231 | 111  | -231 | 63   |
| -231 | -231 | 24   | 115  |
| -231 | 165  | -231 | -19  |
| -231 | -231 | -231 | 153  |
| -231 | -231 | 165  | -19  |
| -231 | 165  | -231 | -19  |
| -231 | 24   | -231 | 115  |
| 115  | 24   | -231 | -231 |
| 153  | -231 | -231 | -231 |
| -231 | 24   | 24   | 63   |
| -231 | -231 | -231 | 153  |
| -231 | -231 | 204  | -231 |
| 115  | -231 | -231 | -19  |
| -231 | -231 | 24   | 115  |
| -231 | 24   | 165  | -231 |

ALPHABET= ACGT

>spsc3\_005. 4

log-odds matrix: alength= 4 w= 15 n= 1012 bayes= 7. 65392 E= 2. 5e+007

|      |      |      |      |
|------|------|------|------|
| 153  | -231 | -231 | -231 |
| -897 | -897 | -897 | 175  |
| -57  | 97   | -897 | 43   |
| -897 | 197  | -3   | -897 |
| -897 | -3   | -897 | 143  |
| 143  | -3   | -897 | -897 |
| -57  | -897 | 97   | 43   |
| -897 | -897 | -3   | 143  |
| 143  | -897 | -3   | -897 |
| -231 | -231 | 24   | 115  |
| -897 | -897 | -897 | 175  |
| 43   | -3   | -3   | -57  |
| 43   | -897 | 156  | -897 |
| -897 | 97   | -897 | 102  |
| -897 | -897 | -897 | 175  |

ALPHABET= ACGT

>spsc3\_006. 1

log-odds matrix: alength= 4 w= 11 n= 966 bayes= 8. 91289 E= 3. 1e+004

|      |      |      |      |
|------|------|------|------|
| -765 | -765 | -765 | 179  |
| 179  | -765 | -765 | -765 |
| -765 | -765 | -765 | 179  |
| -765 | -765 | 223  | -765 |
| -765 | -765 | -765 | 179  |
| 80   | -765 | -765 | 80   |
| -765 | -765 | -765 | 179  |
| -765 | -765 | 223  | -765 |
| -765 | -765 | 223  | -765 |
| -765 | 223  | -765 | -765 |
| 179  | -765 | -765 | -765 |

74203Suppl emental \_CNSmatri ces. pssm. txt

ALPHABET= ACGT

>srs3\_006. 2

log-odds matrix: alength= 4 w= 15 n= 958 bayes= 8. 90087 E= 4. 1e+004

|      |      |      |      |
|------|------|------|------|
| 179  | -765 | -765 | -765 |
| 179  | -765 | -765 | -765 |
| -765 | -765 | -765 | 179  |
| -765 | 223  | -765 | -765 |
| 179  | -765 | -765 | -765 |
| -765 | -765 | 223  | -765 |
| 179  | -765 | -765 | -765 |
| 179  | -765 | -765 | -765 |
| -99  | -99  | -99  | 116  |
| -765 | 123  | -765 | 80   |
| -765 | 223  | -765 | -765 |
| 179  | -765 | -765 | -765 |
| -765 | -765 | 223  | -765 |
| 179  | -765 | -765 | -765 |
| -765 | -765 | -765 | 179  |

ALPHABET= ACGT

>srs3\_006. 5

log-odds matrix: alength= 4 w= 11 n= 966 bayes= 8. 91289 E= 2. 0e+005

|      |      |      |      |
|------|------|------|------|
| -765 | -765 | -765 | 179  |
| 179  | -765 | -765 | -765 |
| 179  | -765 | -765 | -765 |
| 179  | -765 | -765 | -765 |
| -765 | -765 | 223  | -765 |
| -765 | 123  | -765 | 80   |
| 80   | -765 | -765 | 80   |
| 80   | -765 | 123  | -765 |
| 179  | -765 | -765 | -765 |
| -765 | -765 | -765 | 179  |
| -765 | -765 | 223  | -765 |

ALPHABET= ACGT

>srs3\_011. 2

log-odds matrix: alength= 4 w= 12 n= 1103 bayes= 8. 10198 E= 1. 4e+004

|      |      |      |      |
|------|------|------|------|
| 187  | -865 | -865 | -865 |
| 187  | -865 | -865 | -865 |
| 187  | -865 | -865 | -865 |
| 146  | 13   | -865 | -865 |
| 88   | 113  | -865 | -865 |
| -12  | -865 | -865 | 146  |
| -12  | -865 | 172  | -865 |
| -865 | -865 | -865 | 187  |
| -865 | -865 | -865 | 187  |
| 146  | -865 | 13   | -865 |
| -865 | 213  | -865 | -865 |
| -865 | -865 | -865 | 187  |

ALPHABET= ACGT

>srs3\_011. 3

log-odds matrix: alength= 4 w= 11 n= 1107 bayes= 8. 10722 E= 4. 7e+006

|      |      |      |      |
|------|------|------|------|
| 187  | -865 | -865 | -865 |
| 146  | -865 | -865 | -12  |
| 146  | -865 | -865 | -12  |
| -865 | -865 | -865 | 187  |
| -865 | 113  | -865 | 88   |
| 187  | -865 | -865 | -865 |

74203Suppl emental \_CNSmatri ces. pssm. txt

|      |      |      |      |
|------|------|------|------|
| 187  | -865 | -865 | -865 |
| -12  | 13   | -865 | 88   |
| 159  | -199 | -199 | -199 |
| -12  | -865 | -865 | 146  |
| -865 | 213  | -865 | -865 |

ALPHABET= ACGT

>srsc3\_012.1

log-odds matrix: alength= 4 w= 46 n= 954 bayes= 8.30834 E= 1.4e+002

|      |      |      |      |
|------|------|------|------|
| -823 | 258  | -823 | -823 |
| 158  | -823 | -823 | -823 |
| 0    | -823 | -823 | 100  |
| -823 | -823 | 258  | -823 |
| 100  | -823 | -823 | 0    |
| -823 | -823 | -823 | 158  |
| -823 | 99   | 199  | -823 |
| 100  | 99   | -823 | -823 |
| -823 | -823 | 258  | -823 |
| 100  | 99   | -823 | -823 |
| 158  | -823 | -823 | -823 |
| 0    | 199  | -823 | -823 |
| -823 | -823 | -823 | 158  |
| 0    | 199  | -823 | -823 |
| 0    | -823 | 99   | 0    |
| 0    | -823 | 99   | 0    |
| 158  | -823 | -823 | -823 |
| 100  | 99   | -823 | -823 |
| 0    | -823 | 199  | -823 |
| -823 | -823 | -823 | 158  |
| 0    | 199  | -823 | -823 |
| -823 | 258  | -823 | -823 |
| 100  | -823 | -823 | 0    |
| 100  | -823 | 99   | -823 |
| 158  | -823 | -823 | -823 |
| 158  | -823 | -823 | -823 |
| -823 | 258  | -823 | -823 |
| 100  | -823 | -823 | 0    |
| 100  | -823 | 99   | -823 |
| 100  | 99   | -823 | -823 |
| -823 | -823 | -823 | 158  |
| 100  | -823 | 99   | -823 |
| -823 | -823 | -823 | 158  |
| -823 | 258  | -823 | -823 |
| 100  | -823 | 99   | -823 |
| 100  | 99   | -823 | -823 |
| 0    | 99   | 99   | -823 |
| 158  | -823 | -823 | -823 |
| 0    | -823 | 199  | -823 |
| -823 | 99   | 199  | -823 |
| 0    | 99   | -823 | 0    |
| 158  | -823 | -823 | -823 |
| -823 | 99   | -823 | 100  |
| -823 | -823 | -823 | 158  |
| -823 | 199  | -823 | 0    |
| -823 | 258  | -823 | -823 |

ALPHABET= ACGT

>srsc3\_012.3

log-odds matrix: alength= 4 w= 13 n= 1053 bayes= 8.45121 E= 1.3e+004

|     |      |      |      |
|-----|------|------|------|
| 158 | -823 | -823 | -823 |
| 158 | -823 | -823 | -823 |

74203Suppl emental \_CNSmatri ces. pssm. txt

|      |      |      |      |
|------|------|------|------|
| 100  | 99   | -823 | -823 |
| 158  | -823 | -823 | -823 |
| -823 | -823 | -823 | 158  |
| -823 | -823 | 258  | -823 |
| -823 | 258  | -823 | -823 |
| -823 | 99   | -823 | 100  |
| -823 | -823 | -823 | 158  |
| 158  | -823 | -823 | -823 |
| 100  | -823 | 99   | -823 |
| -823 | -823 | -823 | 158  |
| -823 | 258  | -823 | -823 |

ALPHABET= ACGT

>srsc3\_012. 4

log-odds matrix: alength= 4 w= 10 n= 1062 bayes= 8. 46352 E= 1. 9e+004

|      |      |      |      |
|------|------|------|------|
| -823 | -823 | -823 | 158  |
| -823 | 258  | -823 | -823 |
| -823 | -823 | -823 | 158  |
| -823 | -823 | 258  | -823 |
| -823 | 99   | 199  | -823 |
| 158  | -823 | -823 | -823 |
| -823 | -823 | -823 | 158  |
| -823 | 99   | -823 | 100  |
| -823 | -823 | -823 | 158  |
| -823 | -823 | -823 | 158  |

ALPHABET= ACGT

>srsc3\_012. 7

log-odds matrix: alength= 4 w= 13 n= 1053 bayes= 8. 45121 E= 3. 3e+005

|      |      |      |      |
|------|------|------|------|
| 158  | -823 | -823 | -823 |
| -823 | 258  | -823 | -823 |
| 0    | -823 | -823 | 100  |
| 0    | -823 | -823 | 100  |
| -823 | -823 | 99   | 100  |
| -823 | 99   | -823 | 100  |
| -823 | -823 | -823 | 158  |
| -823 | -823 | 258  | -823 |
| 0    | 199  | -823 | -823 |
| 158  | -823 | -823 | -823 |
| -823 | -823 | -823 | 158  |
| 0    | -823 | 99   | 0    |
| -823 | 258  | -823 | -823 |

ALPHABET= ACGT

>srsc3\_016. 1

log-odds matrix: alength= 4 w= 37 n= 368 bayes= 6. 92679 E= 6. 6e+000

|      |      |      |      |
|------|------|------|------|
| -823 | 238  | -823 | -823 |
| 111  | -823 | -823 | 11   |
| 11   | 79   | -823 | 11   |
| 170  | -823 | -823 | -823 |
| -823 | -823 | -823 | 170  |
| 11   | -823 | 179  | -823 |
| -823 | 79   | -823 | 111  |
| -823 | -823 | 238  | -823 |
| -823 | -823 | 79   | 111  |
| 170  | -823 | -823 | -823 |
| 111  | 79   | -823 | -823 |
| 111  | -823 | -823 | 11   |
| 170  | -823 | -823 | -823 |
| 11   | -823 | -823 | 111  |

74203Suppl emental \_CNSmatri ces. pssm. txt

|      |      |      |      |
|------|------|------|------|
| -823 | 238  | -823 | -823 |
| 11   | 79   | 79   | -823 |
| -823 | -823 | -823 | 170  |
| -823 | -823 | -823 | 170  |
| -823 | 79   | -823 | 111  |
| 170  | -823 | -823 | -823 |
| -823 | 79   | 79   | 11   |
| 170  | -823 | -823 | -823 |
| 111  | 79   | -823 | -823 |
| -823 | -823 | 238  | -823 |
| 111  | -823 | 79   | -823 |
| 111  | -823 | 79   | -823 |
| -823 | 179  | -823 | 11   |
| -823 | 238  | -823 | -823 |
| -823 | 179  | -823 | 11   |
| 170  | -823 | -823 | -823 |
| 111  | -823 | 79   | -823 |
| -823 | 238  | -823 | -823 |
| -823 | -823 | -823 | 170  |
| 11   | -823 | 179  | -823 |
| -823 | 79   | -823 | 111  |
| -823 | 238  | -823 | -823 |
| -823 | 238  | -823 | -823 |

ALPHABET= ACGT

>srsc3\_016.2

log-odds matrix: alength= 4 w= 10 n= 449 bayes= 7.21594 E= 9.0e+002

|      |      |      |      |
|------|------|------|------|
| -823 | 238  | -823 | -823 |
| 11   | 179  | -823 | -823 |
| -823 | -823 | -823 | 170  |
| -823 | -823 | -823 | 170  |
| -823 | 179  | 79   | -823 |
| -823 | 238  | -823 | -823 |
| -823 | 238  | -823 | -823 |
| -823 | -823 | -823 | 170  |
| 111  | 79   | -823 | -823 |
| -823 | -823 | -823 | 170  |

ALPHABET= ACGT

>srsc3\_016.3

log-odds matrix: alength= 4 w= 10 n= 449 bayes= 7.21594 E= 8.1e+002

|      |      |      |      |
|------|------|------|------|
| -823 | -823 | -823 | 170  |
| 170  | -823 | -823 | -823 |
| 170  | -823 | -823 | -823 |
| 170  | -823 | -823 | -823 |
| -823 | -823 | -823 | 170  |
| -823 | -823 | -823 | 170  |
| -823 | -823 | -823 | 170  |
| 111  | -823 | 79   | -823 |
| -823 | -823 | 238  | -823 |
| -823 | 238  | -823 | -823 |

ALPHABET= ACGT

>srsc3\_016.5

log-odds matrix: alength= 4 w= 10 n= 449 bayes= 7.21594 E= 1.1e+005

|      |      |      |      |
|------|------|------|------|
| -823 | -823 | -823 | 170  |
| -823 | 179  | -823 | 11   |
| 11   | -823 | -823 | 111  |
| 11   | 79   | -823 | 11   |
| 170  | -823 | -823 | -823 |



74203Suppl emental \_CNSmatri ces. pssm. txt

|      |      |      |      |
|------|------|------|------|
| -823 | 238  | -823 | -823 |
| -823 | -823 | -823 | 170  |
| -823 | -823 | -823 | 170  |
| -823 | -823 | 79   | 111  |
| -823 | -823 | -823 | 170  |

ALPHABET= ACGT

>srsc3\_019.1

log-odds matrix: alength= 4 w= 23 n= 935 bayes= 8.86573 E= 4.1e+003

|      |      |      |      |
|------|------|------|------|
| -765 | -765 | -765 | 182  |
| 182  | -765 | -765 | -765 |
| 182  | -765 | -765 | -765 |
| -765 | 219  | -765 | -765 |
| -765 | -765 | -765 | 182  |
| -765 | -765 | -765 | 182  |
| -765 | 219  | -765 | -765 |
| -765 | -765 | -765 | 182  |
| -765 | -765 | -765 | 182  |
| -765 | -765 | -765 | 182  |
| 182  | -765 | -765 | -765 |
| 182  | -765 | -765 | -765 |
| 182  | -765 | -765 | -765 |
| -765 | -765 | -765 | 182  |
| -765 | -765 | 219  | -765 |
| 182  | -765 | -765 | -765 |
| -765 | -765 | -765 | 182  |
| -765 | -765 | 219  | -765 |
| -765 | 219  | -765 | -765 |
| -765 | -765 | -765 | 182  |
| -765 | -765 | -765 | 182  |
| -765 | -765 | -765 | 182  |
| -765 | 219  | -765 | -765 |

ALPHABET= ACGT

>srsc3\_019.4

log-odds matrix: alength= 4 w= 21 n= 939 bayes= 8.87191 E= 2.4e+004

|      |      |      |      |
|------|------|------|------|
| -765 | 219  | -765 | -765 |
| -765 | -765 | -765 | 182  |
| 83   | -765 | 119  | -765 |
| -765 | -765 | 219  | -765 |
| 182  | -765 | -765 | -765 |
| 182  | -765 | -765 | -765 |
| -765 | -765 | 219  | -765 |
| -765 | 119  | -765 | 83   |
| -765 | -765 | -765 | 182  |
| -765 | 219  | -765 | -765 |
| 182  | -765 | -765 | -765 |
| -765 | -765 | 219  | -765 |
| -765 | -765 | 119  | 83   |
| -765 | -765 | -765 | 182  |
| -765 | 219  | -765 | -765 |
| 182  | -765 | -765 | -765 |
| -99  | -99  | 147  | -99  |
| -765 | -765 | -765 | 182  |
| -765 | -765 | -765 | 182  |
| -765 | -765 | 219  | -765 |

ALPHABET= ACGT

>srsc3\_019.5

74203Suppl emental \_CNSmatri ces. pssm. txt

log-odds matrix: alength= 4 w= 10 n= 961 bayes= 8.90539 E= 4.4e+004

|      |      |      |      |
|------|------|------|------|
| 182  | -765 | -765 | -765 |
| -765 | -765 | 219  | -765 |
| -765 | 219  | -765 | -765 |
| 182  | -765 | -765 | -765 |
| 83   | -765 | -765 | 83   |
| -765 | 219  | -765 | -765 |
| 83   | -765 | -765 | 83   |
| -765 | 219  | -765 | -765 |
| -765 | -765 | -765 | 182  |
| -765 | -765 | 219  | -765 |

ALPHABET= ACGT

>srsc3\_019.6

log-odds matrix: alength= 4 w= 11 n= 959 bayes= 8.90238 E= 4.9e+004

|      |      |      |      |
|------|------|------|------|
| 182  | -765 | -765 | -765 |
| -765 | -765 | -765 | 182  |
| 182  | -765 | -765 | -765 |
| -765 | 219  | -765 | -765 |
| -765 | -765 | -765 | 182  |
| -765 | 119  | -765 | 83   |
| -765 | -765 | -765 | 182  |
| -765 | 219  | -765 | -765 |
| 182  | -765 | -765 | -765 |
| -765 | 219  | -765 | -765 |
| 182  | -765 | -765 | -765 |

ALPHABET= ACGT

>srsc3\_019.7

log-odds matrix: alength= 4 w= 11 n= 959 bayes= 8.90238 E= 6.5e+004

|      |      |      |      |
|------|------|------|------|
| -765 | -765 | 219  | -765 |
| -765 | 219  | -765 | -765 |
| 83   | -765 | -765 | 83   |
| -765 | -765 | -765 | 182  |
| 83   | -765 | 119  | -765 |
| -765 | 219  | -765 | -765 |
| -765 | 219  | -765 | -765 |
| -765 | -765 | -765 | 182  |
| -765 | 119  | -765 | 83   |
| -765 | 219  | -765 | -765 |
| 182  | -765 | -765 | -765 |

ALPHABET= ACGT

>srsc3\_019.8

log-odds matrix: alength= 4 w= 14 n= 953 bayes= 8.8933 E= 7.5e+004

|      |      |      |      |
|------|------|------|------|
| -765 | -765 | 219  | -765 |
| 182  | -765 | -765 | -765 |
| 83   | -765 | 119  | -765 |
| 182  | -765 | -765 | -765 |
| -765 | 119  | 119  | -765 |
| 182  | -765 | -765 | -765 |
| 182  | -765 | -765 | -765 |
| -765 | -765 | 219  | -765 |
| 182  | -765 | -765 | -765 |
| 83   | 119  | -765 | -765 |
| -765 | -765 | -765 | 182  |
| 182  | -765 | -765 | -765 |
| -765 | -765 | -765 | 182  |
| -765 | 219  | -765 | -765 |

ALPHABET= ACGT

&gt;srsc3\_019.9

log-odds matrix: alength= 4 w= 11 n= 959 bayes= 8.90238 E= 8.7e+004

|      |      |      |      |
|------|------|------|------|
| -765 | -765 | -765 | 182  |
| -765 | -765 | -765 | 182  |
| -765 | -765 | 219  | -765 |
| 83   | 119  | -765 | -765 |
| 182  | -765 | -765 | -765 |
| -765 | 119  | 119  | -765 |
| 182  | -765 | -765 | -765 |
| -765 | -765 | -765 | 182  |
| 182  | -765 | -765 | -765 |
| -765 | 219  | -765 | -765 |
| 182  | -765 | -765 | -765 |

ALPHABET= ACGT

&gt;srsc3\_022.1

log-odds matrix: alength= 4 w= 19 n= 673 bayes= 7.80305 E= 1.4e+004

|      |      |      |      |
|------|------|------|------|
| -823 | -823 | 224  | -823 |
| -823 | 66   | 66   | 21   |
| -823 | -823 | -823 | 179  |
| 21   | -823 | -823 | 120  |
| 120  | -823 | -823 | 21   |
| -823 | -823 | -823 | 179  |
| 120  | 66   | -823 | -823 |
| 179  | -823 | -823 | -823 |
| 179  | -823 | -823 | -823 |
| 179  | -823 | -823 | -823 |
| -823 | 166  | 66   | -823 |
| 179  | -823 | -823 | -823 |
| -823 | 66   | -823 | 120  |
| -823 | -823 | -823 | 179  |
| 120  | -823 | 66   | -823 |
| -823 | 66   | 166  | -823 |
| -823 | -823 | -823 | 179  |
| -823 | -823 | -823 | 179  |
| -823 | -823 | -823 | 179  |

ALPHABET= ACGT

&gt;srsc3\_022.2

log-odds matrix: alength= 4 w= 11 n= 697 bayes= 7.85383 E= 8.4e+004

|      |      |      |      |
|------|------|------|------|
| 179  | -823 | -823 | -823 |
| -823 | 166  | -823 | 21   |
| -823 | 66   | 166  | -823 |
| -823 | -823 | 224  | -823 |
| -823 | 166  | -823 | 21   |
| 179  | -823 | -823 | -823 |
| 120  | 66   | -823 | -823 |
| 179  | -823 | -823 | -823 |
| 179  | -823 | -823 | -823 |
| 21   | 166  | -823 | -823 |
| 179  | -823 | -823 | -823 |

ALPHABET= ACGT

&gt;srsc3\_023.1

log-odds matrix: alength= 4 w= 23 n= 443 bayes= 7.78463 E= 6.8e+003

|      |      |      |      |
|------|------|------|------|
| -765 | -765 | 211  | -765 |
| 89   | -765 | 112  | -765 |
| 188  | -765 | -765 | -765 |

74203Suppl emental \_CNSmatri ces. pssm. txt

```

188 -765 -765 -765
-765 -765 211 -765
-765 211 -765 -765
-765 -765 112 89
89 -765 112 -765
-765 211 -765 -765
188 -765 -765 -765
-765 -765 -765 188
-765 -765 211 -765
188 -765 -765 -765
188 -765 -765 -765
188 -765 -765 -765
-765 112 112 -765
-765 -765 -765 188
-765 -765 112 89
-765 211 -765 -765
-765 211 -765 -765
188 -765 -765 -765
188 -765 -765 -765
188 -765 -765 -765

```

ALPHABET= ACGT

>spsc3\_023. 2

log-odds matrix: alength= 4 w= 13 n= 463 bayes= 7. 84862 E= 9. 2e+003

```

188 -765 -765 -765
-765 -765 211 -765
-765 -765 211 -765
188 -765 -765 -765
188 -765 -765 -765
-765 211 -765 -765
89 112 -765 -765
188 -765 -765 -765
89 -765 112 -765
-765 211 -765 -765
188 -765 -765 -765
-765 -765 211 -765
188 -765 -765 -765

```

ALPHABET= ACGT

>spsc3\_025. 1

log-odds matrix: alength= 4 w= 37 n= 1022 bayes= 8. 40798 E= 8. 6e-004

```

179 -823 -823 -823
179 -823 -823 -823
179 -823 -823 -823
-823 -823 224 -823
-823 -823 224 -823
179 -823 -823 -823
-823 -823 -823 179
-823 -823 -823 179
-823 -823 224 -823
-823 -823 165 21
121 65 -823 -823
-823 -823 224 -823
-823 -823 224 -823
-823 224 -823 -823
179 -823 -823 -823
-823 -823 224 -823
179 -823 -823 -823
121 -823 65 -823
-823 65 -823 121

```

74203Suppl emental \_CNSmatri ces. pssm. txt

```

-158 -158 -158 140
-823 -823 -823 179
179 -823 -823 -823
-823 65 -823 121
-823 224 -823 -823
-823 -823 65 121
-823 -823 224 -823
21 -823 -823 121
-823 -823 224 -823
-823 224 -823 -823
-823 224 -823 -823
121 -823 65 -823
179 -823 -823 -823
-823 -823 -823 179
179 -823 -823 -823
-823 65 -823 121
-823 -823 -823 179

```

ALPHABET= ACGT

>srsc3\_025.2

log-odds matrix: alength= 4 w= 49 n= 986 bayes= 8.35609 E= 2.6e-001

```

-823 224 -823 -823
-823 -823 -823 179
-823 -823 224 -823
-823 -823 -823 179
-823 -823 -823 179
21 65 -823 21
-823 65 -823 121
21 -823 165 -823
179 -823 -823 -823
121 -823 65 -823
-823 -823 -823 179
-823 -823 -823 179
-823 65 -823 121
-823 -823 165 21
179 -823 -823 -823
-823 -823 -823 179
-823 -823 -823 179
121 65 -823 -823
-823 65 -823 121
-823 -823 224 -823
-823 -823 -823 179
121 -823 -823 21
-823 -823 -823 179
21 65 65 -823
179 -823 -823 -823
-823 -823 -823 179
-823 -823 -823 179
121 -823 -823 21
121 -823 65 -823
-823 -823 -823 179
121 -823 65 -823
21 -823 -823 121
-823 224 -823 -823
179 -823 -823 -823
-823 224 -823 -823
179 -823 -823 -823
-823 -823 224 -823
-823 165 -823 21
21 -823 65 21
-823 -823 224 -823
21 165 -823 -823

```

74203Supplemental\_CNSmatrices.pssm.txt

```

179 -823 -823 -823
121 -823 -823 21
121 -823 -823 21
-823 -823 224 -823
-823 65 -823 121
-823 -823 -823 179
-823 -823 224 -823
179 -823 -823 -823

```

ALPHABET= ACGT

>srsc3\_025.3

log-odds matrix: alength= 4 w= 14 n= 1091 bayes= 8.5025 E= 1.9e+003

```

-823 -823 -823 179
-823 -823 -823 179
-823 -823 -823 179
-823 -823 224 -823
-823 -823 224 -823
-823 -823 -823 179
-823 -823 -823 179
-823 65 165 -823
179 -823 -823 -823
-823 -823 165 21
179 -823 -823 -823
179 -823 -823 -823
21 165 -823 -823
179 -823 -823 -823

```

ALPHABET= ACGT

>srsc3\_025.4

log-odds matrix: alength= 4 w= 21 n= 1070 bayes= 8.47438 E= 7.3e+004

```

-823 -823 224 -823
179 -823 -823 -823
121 -823 65 -823
-823 -823 165 21
21 -823 165 -823
21 -823 65 21
-823 -823 224 -823
-823 65 -823 121
-823 -823 -823 179
121 -823 65 -823
21 -823 -823 121
-823 -823 -823 179
21 -823 65 21
21 -823 165 -823
-823 -823 165 21
-823 -823 224 -823
-823 165 -823 21
-823 224 -823 -823
-823 -823 -823 179
-823 -823 -823 179
179 -823 -823 -823

```

ALPHABET= ACGT

>srsc3\_025.6

log-odds matrix: alength= 4 w= 12 n= 1097 bayes= 8.51043 E= 4.9e+005

```

-823 -823 -823 179
121 -823 65 -823
179 -823 -823 -823
121 -823 -823 21
-823 -823 -823 179

```

74203Suppl emental \_CNSmatri ces. pssm. txt

|      |      |      |      |
|------|------|------|------|
| 121  | 65   | -823 | -823 |
| -823 | -823 | -823 | 179  |
| 179  | -823 | -823 | -823 |
| -823 | 65   | 65   | 21   |
| 179  | -823 | -823 | -823 |
| -823 | -823 | 224  | -823 |
| -823 | -823 | -823 | 179  |

ALPHABET= ACGT

>srsc3\_030. 1

log-odds matrix: alength= 4 w= 11 n= 617 bayes= 8.26444 E= 1.5e+005

|      |      |      |      |
|------|------|------|------|
| -765 | 203  | -765 | -765 |
| -765 | -765 | 103  | 97   |
| -765 | -765 | -765 | 196  |
| -765 | 103  | -765 | 97   |
| -99  | 134  | -99  | -99  |
| -765 | -765 | -765 | 196  |
| -765 | -765 | 103  | 97   |
| -765 | -765 | -765 | 196  |
| -765 | -765 | -765 | 196  |
| -765 | 203  | -765 | -765 |
| -765 | -765 | -765 | 196  |

ALPHABET= ACGT

>srsc3\_032. 1

log-odds matrix: alength= 4 w= 12 n= 599 bayes= 8.22159 E= 1.3e+004

|      |      |      |      |
|------|------|------|------|
| -765 | -765 | 209  | -765 |
| -765 | 209  | -765 | -765 |
| -765 | 209  | -765 | -765 |
| -765 | 209  | -765 | -765 |
| 190  | -765 | -765 | -765 |
| 90   | -765 | 109  | -765 |
| -765 | -765 | 209  | -765 |
| 90   | 109  | -765 | -765 |
| 90   | -765 | 109  | -765 |
| -765 | -765 | -765 | 190  |
| -765 | -765 | 209  | -765 |
| -765 | -765 | 209  | -765 |

ALPHABET= ACGT

>srsc3\_033. 1

log-odds matrix: alength= 4 w= 49 n= 838 bayes= 8.12067 E= 9.7e-001

|      |      |      |      |
|------|------|------|------|
| -823 | -823 | -823 | 185  |
| -823 | -823 | 215  | -823 |
| 127  | 57   | -823 | -823 |
| -823 | -823 | -823 | 185  |
| 27   | -823 | -823 | 127  |
| -823 | 57   | -823 | 127  |
| 27   | -823 | -823 | 127  |
| -823 | 57   | 157  | -823 |
| -823 | -823 | -823 | 185  |
| -823 | -823 | 157  | 27   |
| 127  | 57   | -823 | -823 |
| -823 | -823 | -823 | 185  |
| -823 | -823 | -823 | 185  |
| -823 | -823 | 215  | -823 |
| -823 | 215  | -823 | -823 |
| -823 | 215  | -823 | -823 |
| 127  | -823 | -823 | 27   |
| -823 | -823 | 157  | 27   |

74203Suppl emental \_CNSmatri ces. pssm. txt

|      |      |      |      |
|------|------|------|------|
| 127  | 57   | -823 | -823 |
| -823 | 157  | -823 | 27   |
| -823 | 215  | -823 | -823 |
| -823 | -823 | -823 | 185  |
| -823 | -823 | -823 | 185  |
| 127  | -823 | 57   | -823 |
| 27   | -823 | 157  | -823 |
| -823 | -823 | -823 | 185  |
| -823 | 57   | -823 | 127  |
| 185  | -823 | -823 | -823 |
| -823 | -823 | -823 | 185  |
| 185  | -823 | -823 | -823 |
| -823 | -823 | -823 | 185  |
| 127  | -823 | 57   | -823 |
| -823 | -823 | 215  | -823 |
| -823 | 157  | -823 | 27   |
| -823 | -823 | -823 | 185  |
| -823 | -823 | 215  | -823 |
| -823 | 157  | 57   | -823 |
| -823 | 57   | -823 | 127  |
| -823 | -823 | -823 | 185  |
| 127  | -823 | -823 | 27   |
| -823 | -823 | -823 | 185  |
| 27   | -823 | 57   | 27   |
| 185  | -823 | -823 | -823 |
| -823 | 57   | -823 | 127  |
| 27   | -823 | -823 | 127  |
| -823 | -823 | -823 | 185  |
| -823 | -823 | -823 | 185  |
| -823 | -823 | -823 | 185  |
| -823 | 57   | 157  | -823 |

ALPHABET= ACGT

>srsc3\_038. 1

log-odds matrix: alength= 4 w= 16 n= 469 bayes= 7. 86728 E= 3. 0e+003

|      |      |      |      |
|------|------|------|------|
| -765 | -765 | -765 | 178  |
| -765 | -765 | 224  | -765 |
| -765 | -765 | 224  | -765 |
| 178  | -765 | -765 | -765 |
| -765 | 224  | -765 | -765 |
| 178  | -765 | -765 | -765 |
| -765 | 125  | -765 | 78   |
| -765 | -765 | -765 | 178  |
| 178  | -765 | -765 | -765 |
| -765 | -765 | -765 | 178  |
| -765 | -765 | -765 | 178  |
| 178  | -765 | -765 | -765 |
| -765 | -765 | 224  | -765 |
| -765 | -765 | 224  | -765 |
| 78   | -765 | 125  | -765 |
| -765 | -765 | 224  | -765 |

ALPHABET= ACGT

>srsc3\_038. 2

log-odds matrix: alength= 4 w= 21 n= 459 bayes= 7. 83605 E= 5. 7e+003

|      |      |      |      |
|------|------|------|------|
| -765 | -765 | 224  | -765 |
| -765 | -765 | -765 | 178  |
| -765 | -765 | -765 | 178  |
| -765 | 224  | -765 | -765 |
| -765 | -765 | -765 | 178  |
| -765 | 125  | -765 | 78   |



74203Suppl emental \_CNSmatri ces. pssm. txt

```

-765 125 -765 78
-765 224 -765 -765
178 -765 -765 -765
-765 -765 -765 178
-765 -765 -765 178
-765 -765 125 78
-765 -765 -765 178
-765 -765 224 -765
-765 224 -765 -765
-765 -765 -765 178
178 -765 -765 -765
178 -765 -765 -765
178 -765 -765 -765
178 -765 -765 -765
-765 -765 -765 178

```

ALPHABET= ACGT

>srsc4\_002.1

log-odds matrix: alength= 4 w= 11 n= 689 bayes= 7.8371 E= 6.4e+002

```

-823 -823 -823 190
190 -823 -823 -823
-823 -823 -823 190
-823 -823 210 -823
32 -823 51 32
-823 210 -823 -823
-823 210 -823 -823
190 -823 -823 -823
-823 -823 210 -823
-823 51 151 -823
-823 210 -823 -823

```

ALPHABET= ACGT

>srsc4\_002.2

log-odds matrix: alength= 4 w= 30 n= 632 bayes= 7.71195 E= 4.8e+002

```

-823 -823 -823 190
132 -823 -823 32
-823 210 -823 -823
-823 51 -823 132
32 51 -823 32
-823 210 -823 -823
-823 151 51 -823
-823 151 -823 32
-823 210 -823 -823
32 51 51 -823
-823 151 -823 32
132 -823 -823 32
-158 81 81 -158
-823 -823 -823 190
190 -823 -823 -823
32 151 -823 -823
-823 -823 51 132
190 -823 -823 -823
-823 -823 210 -823
32 -823 -823 132
-823 -823 -823 190
-823 51 151 -823
190 -823 -823 -823
-823 -823 210 -823
-823 -823 -823 190
190 -823 -823 -823
-823 51 151 -823

```

74203Suppl emental \_CNSmatri ces. pssm. txt

|      |      |      |      |
|------|------|------|------|
| 190  | -823 | -823 | -823 |
| 32   | -823 | 151  | -823 |
| -823 | -823 | -823 | 190  |

ALPHABET= ACGT

>srsc4\_002.3

log-odds matrix: alength= 4 w= 11 n= 689 bayes= 7.8371 E= 3.4e+003

|      |      |      |      |
|------|------|------|------|
| 190  | -823 | -823 | -823 |
| 32   | 151  | -823 | -823 |
| -823 | 210  | -823 | -823 |
| -823 | -823 | -823 | 190  |
| -823 | -823 | 210  | -823 |
| -823 | -823 | 210  | -823 |
| -823 | 210  | -823 | -823 |
| 132  | -823 | -823 | 32   |
| -823 | 51   | -823 | 132  |
| -823 | 210  | -823 | -823 |
| -823 | -823 | -823 | 190  |

ALPHABET= ACGT

>srsc4\_002.4

log-odds matrix: alength= 4 w= 16 n= 674 bayes= 7.80521 E= 5.2e+003

|      |      |      |      |
|------|------|------|------|
| -823 | -823 | -823 | 190  |
| 32   | -823 | -823 | 132  |
| -823 | 210  | -823 | -823 |
| 132  | -823 | -823 | 32   |
| 190  | -823 | -823 | -823 |
| 132  | 51   | -823 | -823 |
| -823 | -823 | -823 | 190  |
| -823 | -823 | -823 | 190  |
| 132  | -823 | 51   | -823 |
| 190  | -823 | -823 | -823 |
| -823 | 210  | -823 | -823 |
| -823 | 151  | -823 | 32   |
| -823 | 51   | 151  | -823 |
| -823 | -823 | -823 | 190  |
| -823 | -823 | 210  | -823 |
| -823 | -823 | -823 | 190  |

ALPHABET= ACGT

>srsc4\_003.1

log-odds matrix: alength= 4 w= 21 n= 1699 bayes= 8.40429 E= 1.6e+000

|      |      |      |      |
|------|------|------|------|
| -897 | -897 | -897 | 180  |
| 107  | -897 | 90   | -897 |
| -897 | 90   | -897 | 107  |
| 148  | -897 | -9   | -897 |
| -52  | 90   | -897 | 48   |
| -897 | -897 | -897 | 180  |
| -897 | 149  | 90   | -897 |
| -52  | -9   | -897 | 107  |
| 148  | -897 | -897 | -52  |
| -897 | 190  | -897 | -52  |
| -897 | 223  | -897 | -897 |
| -897 | -897 | -897 | 180  |
| -52  | -9   | 149  | -897 |
| -897 | -897 | -897 | 180  |
| -897 | 149  | -9   | -52  |
| 180  | -897 | -897 | -897 |
| -897 | -897 | -897 | 180  |
| -897 | -897 | -897 | 180  |

74203Supplemental\_CNSmatrices.pssm.txt

```
-897   -9   -897   148
 180  -897  -897  -897
 -52  -897   190  -897
```

ALPHABET= ACGT

>srsc4\_003.2

log-odds matrix: alength= 4 w= 16 n= 1724 bayes= 8.42543 E= 7.8e+002

```
-897  -897  223  -897
-897  -897  -897  180
 180  -897  -897  -897
 -52  -897  -897  148
-897  -897  223  -897
 -52  -897   -9  107
 48  -897   -9   48
-897  -897  -897  180
-897  -897  -897  180
 -52   -9   -9   48
-897  -897  -897  180
-897   -9   -9  107
-897  -897   90  107
-897  -897  -897  180
-897  -897  -897  180
-897   90  -897  107
```

ALPHABET= ACGT

>srsc4\_003.3

log-odds matrix: alength= 4 w= 15 n= 1729 bayes= 8.42962 E= 2.2e+004

```
180  -897  -897  -897
-897  -897  -897  180
-897   90   90  -52
 -52   -9   -9   48
-897   -9  -897  148
 -52  149  -897  -52
 48  -897   -9   48
-897  -897  -897  180
-897   90  -897  107
-897  223  -897  -897
-897  -897  -897  180
-897  -897  -897  180
-897  -897  -897  180
 -52  -897  190  -897
-897   -9  -897  148
```

ALPHABET= ACGT

>srsc4\_003.4

log-odds matrix: alength= 4 w= 21 n= 1699 bayes= 8.40429 E= 2.8e+007

```
-897  223  -897  -897
 180  -897  -897  -897
 -52  -897  190  -897
 107  -897  -897   48
 107  -897  -897   48
 -52  -897   -9  107
-897  -897   -9  148
 148  -897  -897  -52
-897   -9  190  -897
 -52   90  -897   48
 48   -9  -897   48
 107   -9  -897  -52
 148   -9  -897  -897
-897  -897   90  107
```

74203Suppl emental \_CNSmatri ces. pssm. txt

|      |      |      |      |
|------|------|------|------|
| 107  | -9   | -897 | -52  |
| 180  | -897 | -897 | -897 |
| 48   | -9   | -897 | 48   |
| 148  | -897 | -897 | -52  |
| -897 | 190  | -897 | -52  |
| 107  | -897 | -897 | 48   |
| 148  | -9   | -897 | -897 |

ALPHABET= ACGT

>srsc4\_006. 1

log-odds matrix: a length= 4 w= 14 n= 525 bayes= 8. 03067 E= 5. 7e+003

|      |      |      |      |
|------|------|------|------|
| -765 | -765 | 216  | -765 |
| -765 | -765 | -765 | 184  |
| -765 | -765 | 216  | -765 |
| -765 | -765 | -765 | 184  |
| -765 | -765 | 216  | -765 |
| 85   | 116  | -765 | -765 |
| -765 | -765 | -765 | 184  |
| -765 | 216  | -765 | -765 |
| 184  | -765 | -765 | -765 |
| -765 | -765 | 216  | -765 |
| 184  | -765 | -765 | -765 |
| -765 | 116  | -765 | 85   |
| -765 | -765 | -765 | 184  |
| -765 | -765 | 216  | -765 |

ALPHABET= ACGT

>srsc4\_006. 3

log-odds matrix: a length= 4 w= 10 n= 533 bayes= 8. 05257 E= 2. 6e+004

|      |      |      |      |
|------|------|------|------|
| 184  | -765 | -765 | -765 |
| 184  | -765 | -765 | -765 |
| 184  | -765 | -765 | -765 |
| 184  | -765 | -765 | -765 |
| 184  | -765 | -765 | -765 |
| -765 | -765 | -765 | 184  |
| 85   | -765 | -765 | 85   |
| -765 | -765 | 216  | -765 |
| -765 | 216  | -765 | -765 |
| 184  | -765 | -765 | -765 |

ALPHABET= ACGT

>srsc4\_007. 1

log-odds matrix: a length= 4 w= 20 n= 1497 bayes= 8. 96 E= 3. 3e+003

|      |      |      |      |
|------|------|------|------|
| 184  | -823 | -823 | -823 |
| 125  | -823 | 59   | -823 |
| 184  | -823 | -823 | -823 |
| -823 | 159  | 59   | -823 |
| 184  | -823 | -823 | -823 |
| 125  | -823 | 59   | -823 |
| 25   | -823 | 159  | -823 |
| -823 | -823 | -823 | 184  |
| -823 | -823 | 218  | -823 |
| -823 | -823 | -823 | 184  |
| 25   | -823 | 159  | -823 |
| 25   | 59   | -823 | 25   |
| -823 | -823 | -823 | 184  |
| -823 | 218  | -823 | -823 |
| 184  | -823 | -823 | -823 |
| -823 | -823 | 218  | -823 |
| 184  | -823 | -823 | -823 |

74203Suppl emental \_CNSmatri ces. pssm. txt

```
-823 159 -823 25
-823 -823 -823 184
-823 -823 218 -823
```

ALPHABET= ACGT

>srsc4\_007. 2

log-odds matrix: alength= 4 w= 15 n= 1512 bayes= 8.97441 E= 2.6e+005

```
-823 -823 218 -823
-823 -823 59 125
184 -823 -823 -823
184 -823 -823 -823
-823 59 -823 125
125 -823 -823 25
-823 -823 -823 184
-823 -823 -823 184
125 -823 59 -823
-823 -823 218 -823
-823 -823 218 -823
25 159 -823 -823
125 59 -823 -823
184 -823 -823 -823
184 -823 -823 -823
```

ALPHABET= ACGT

>srsc4\_007. 3

log-odds matrix: alength= 4 w= 11 n= 1524 bayes= 8.98584 E= 3.9e+005

```
184 -823 -823 -823
-823 -823 218 -823
25 -823 59 25
184 -823 -823 -823
-823 -823 218 -823
25 -823 159 -823
25 -823 -823 125
-823 -823 -823 184
184 -823 -823 -823
184 -823 -823 -823
184 -823 -823 -823
```

ALPHABET= ACGT

>srsc4\_007. 6

log-odds matrix: alength= 4 w= 11 n= 1524 bayes= 8.98584 E= 1.2e+006

```
184 -823 -823 -823
184 -823 -823 -823
144 -158 -158 -158
-823 -823 -823 184
184 -823 -823 -823
-823 -823 218 -823
125 59 -823 -823
184 -823 -823 -823
-823 159 59 -823
-823 59 -823 125
184 -823 -823 -823
```

ALPHABET= ACGT

>srsc4\_013. 5

log-odds matrix: alength= 4 w= 15 n= 316 bayes= 7.29462 E= 2.0e+004

```
-765 -765 216 -765
-765 -765 -765 185
-765 116 -765 85
```

74203Suppl emental \_CNSmatri ces. pssm. txt

|      |      |      |      |
|------|------|------|------|
| 185  | -765 | -765 | -765 |
| -765 | -765 | -765 | 185  |
| -765 | 216  | -765 | -765 |
| 85   | -765 | -765 | 85   |
| 85   | -765 | 116  | -765 |
| 85   | -765 | -765 | 85   |
| -765 | -765 | 116  | 85   |
| -765 | -765 | -765 | 185  |
| -765 | 216  | -765 | -765 |
| -765 | -765 | -765 | 185  |
| -765 | 216  | -765 | -765 |
| -765 | -765 | -765 | 185  |

ALPHABET= ACGT

>srsc4\_020. 1

log-odds matrix: alength= 4 w= 24 n= 1000 bayes= 8. 37649 E= 1. 1e+004

|      |      |      |      |
|------|------|------|------|
| -823 | -823 | -823 | 183  |
| -823 | -823 | 218  | -823 |
| -823 | -823 | 218  | -823 |
| 183  | -823 | -823 | -823 |
| -158 | -158 | 89   | 60   |
| -823 | -823 | -823 | 183  |
| -823 | -823 | -823 | 183  |
| 25   | -823 | -823 | 125  |
| -823 | 60   | 160  | -823 |
| 125  | -823 | 60   | -823 |
| 25   | -823 | 160  | -823 |
| 125  | 60   | -823 | -823 |
| 25   | 160  | -823 | -823 |
| 25   | 60   | -823 | 25   |
| 183  | -823 | -823 | -823 |
| -823 | 218  | -823 | -823 |
| -823 | 60   | -823 | 125  |
| -823 | 218  | -823 | -823 |
| 25   | -823 | -823 | 125  |
| -823 | -823 | -823 | 183  |
| -823 | -823 | -823 | 183  |
| -823 | -823 | -823 | 183  |
| 25   | 160  | -823 | -823 |
| -823 | 160  | 60   | -823 |

ALPHABET= ACGT

>srsc4\_020. 2

log-odds matrix: alength= 4 w= 13 n= 1033 bayes= 8. 42347 E= 2. 8e+005

|      |      |      |      |
|------|------|------|------|
| -823 | 218  | -823 | -823 |
| -823 | 60   | -823 | 125  |
| -823 | -823 | 60   | 125  |
| -823 | -823 | -823 | 183  |
| -823 | -823 | 218  | -823 |
| -823 | -823 | -823 | 183  |
| 25   | -823 | 60   | 25   |
| -823 | -823 | -823 | 183  |
| 25   | -823 | 60   | 25   |
| 25   | 60   | 60   | -823 |
| -823 | -823 | -823 | 183  |
| -823 | -823 | -823 | 183  |
| -823 | 218  | -823 | -823 |

ALPHABET= ACGT

>srsc4\_023. 4

74203Suppl emental \_CNSmatri ces. pssm. txt

log-odds matrix: al length= 4 w= 15 n= 975 bayes= 8.9263 E= 4.8e+004

|      |      |      |      |
|------|------|------|------|
| -765 | -765 | -765 | 176  |
| -765 | -765 | 227  | -765 |
| -765 | -765 | -765 | 176  |
| 76   | -765 | -765 | 76   |
| -765 | 227  | -765 | -765 |
| 176  | -765 | -765 | -765 |
| -765 | -765 | -765 | 176  |
| -765 | -765 | 227  | -765 |
| 76   | -765 | -765 | 76   |
| -765 | -765 | -765 | 176  |
| 76   | -765 | -765 | 76   |
| 176  | -765 | -765 | -765 |
| -765 | -765 | 227  | -765 |
| -765 | 227  | -765 | -765 |
| 176  | -765 | -765 | -765 |

ALPHABET= ACGT

>srsc4\_023.6

log-odds matrix: al length= 4 w= 12 n= 981 bayes= 8.93517 E= 8.7e+004

|      |      |      |      |
|------|------|------|------|
| 176  | -765 | -765 | -765 |
| 176  | -765 | -765 | -765 |
| -765 | 128  | 128  | -765 |
| -765 | 227  | -765 | -765 |
| 176  | -765 | -765 | -765 |
| 76   | 128  | -765 | -765 |
| 76   | -765 | -765 | 76   |
| -765 | 227  | -765 | -765 |
| 176  | -765 | -765 | -765 |
| 176  | -765 | -765 | -765 |
| -765 | 227  | -765 | -765 |
| -765 | -765 | -765 | 176  |

ALPHABET= ACGT

>srsc4\_027.3

log-odds matrix: al length= 4 w= 13 n= 1022 bayes= 8.99435 E= 2.6e+004

|      |      |      |      |
|------|------|------|------|
| 175  | -765 | -765 | -765 |
| -765 | -765 | 229  | -765 |
| 175  | -765 | -765 | -765 |
| -765 | -765 | 229  | -765 |
| -765 | 229  | -765 | -765 |
| 175  | -765 | -765 | -765 |
| 175  | -765 | -765 | -765 |
| -765 | -765 | 129  | 75   |
| 175  | -765 | -765 | -765 |
| -765 | -765 | 229  | -765 |
| -765 | -765 | 129  | 75   |
| -765 | 229  | -765 | -765 |
| -765 | -765 | -765 | 175  |

ALPHABET= ACGT

>srsc4\_027.5

log-odds matrix: al length= 4 w= 17 n= 1014 bayes= 8.98299 E= 2.9e+004

|      |      |      |      |
|------|------|------|------|
| -765 | 229  | -765 | -765 |
| 75   | -765 | -765 | 75   |
| -765 | -765 | 229  | -765 |
| -765 | -765 | -765 | 175  |
| -765 | 129  | 129  | -765 |
| -765 | -765 | -765 | 175  |
| -765 | -765 | 129  | 75   |

74203Suppl emental \_CNSmatri ces. pssm. txt

```
-765 229 -765 -765
-765 -765 -765 -765
-765 229 -765 -765
-765 -765 -765 175
 75 129 -765 -765
-765 229 -765 -765
 75 -765 -765 75
-765 -765 229 -765
-765 -765 -765 175
-765 -765 229 -765
```

ALPHABET= ACGT

>srsc4\_027. 9

log-odds matrix: alength= 4 w= 11 n= 1026 bayes= 9 E= 4. 9e+004

```
-765 229 -765 -765
-765 229 -765 -765
 175 -765 -765 -765
-765 -765 -765 175
 75 129 -765 -765
 175 -765 -765 -765
 75 129 -765 -765
 175 -765 -765 -765
-765 229 -765 -765
-765 -765 -765 175
-765 229 -765 -765
```

ALPHABET= ACGT

>srsc4\_031. 3

log-odds matrix: alength= 4 w= 10 n= 1560 bayes= 8. 60363 E= 1. 5e+011

```
-199 174 -199 -199
-199 -199 -199 165
-199 -199 36 112
-199 36 121 -199
 165 -199 -199 -199
-199 174 -199 -199
 112 36 -199 -199
-199 36 121 -199
-199 -199 -199 165
-199 -199 -199 165
```

ALPHABET= ACGT

>srsc5\_001. 2

log-odds matrix: alength= 4 w= 10 n= 936 bayes= 8. 28077 E= 1. 9e+005

```
-823 -823 -823 167
-823 -823 -823 167
-823 -823 241 -823
-823 -823 -823 167
-158 108 -158 48
-823 -823 -823 167
-158 108 -158 48
 130 -158 -158 -158
-823 -823 -823 167
-823 -823 241 -823
```

ALPHABET= ACGT

>srsc5\_001. 3

log-odds matrix: alength= 4 w= 11 n= 933 bayes= 8. 27612 E= 8. 8e+005

```
-823 -823 -823 167
 9 -823 183 -823
```



74203Suppl emental \_CNSmatri ces. pssm. txt

```

-823 83 183 -823
9 183 -823 -823
-158 196 -158 -158
48 -158 108 -158
167 -823 -823 -823
9 -823 -823 109
-823 -823 -823 167
-823 -823 241 -823
167 -823 -823 -823

```

ALPHABET= ACGT

>spsc5\_001.5

log-odds matrix: alength= 4 w= 21 n= 903 bayes= 8.22882 E= 1.1e+008

```

-158 -158 196 -158
9 83 -823 9
130 -158 -158 -158
-823 183 -823 9
130 -158 -158 -158
-158 -158 196 -158
-158 108 108 -158
9 -823 -823 109
130 -158 -158 -158
-158 108 108 -158
-158 108 -158 48
48 108 -158 -158
-158 196 -158 -158
-158 -158 196 -158
9 -823 83 9
130 -158 -158 -158
-158 196 -158 -158
48 -158 -158 48
167 -823 -823 -823
-158 196 -158 -158
130 -158 -158 -158

```

ALPHABET= ACGT

>spsc5\_001.8

log-odds matrix: alength= 4 w= 12 n= 930 bayes= 8.27146 E= 1.2e+008

```

-158 -158 -158 130
-158 -158 196 -158
-158 196 -158 -158
130 -158 -158 -158
-823 -823 83 109
-823 -823 83 109
-158 -158 -158 130
-158 108 108 -158
-823 -823 83 109
9 83 -823 9
109 -823 -823 9
-823 183 83 -823

```

ALPHABET= ACGT

>spsc5\_001.9

log-odds matrix: alength= 4 w= 11 n= 933 bayes= 8.27612 E= 8.0e+007

```

-823 -823 241 -823
130 -158 -158 -158
-158 -158 -158 130
130 -158 -158 -158
-158 108 108 -158
-158 108 108 -158

```

74203Suppl emental \_CNSmatri ces. pssm. txt

|      |      |      |      |
|------|------|------|------|
| 9    | -823 | 83   | 9    |
| -823 | -823 | -823 | 167  |
| -158 | -158 | 196  | -158 |
| -158 | 108  | 108  | -158 |
| -158 | -158 | 196  | -158 |

ALPHABET= ACGT

>srs5\_007. 6

log-odds matrix: alength= 4 w= 19 n= 995 bayes= 8. 95565 E= 4. 5e+004

|      |      |      |      |
|------|------|------|------|
| -765 | -765 | 234  | -765 |
| -765 | 234  | -765 | -765 |
| -765 | 134  | -765 | 72   |
| 72   | -765 | 134  | -765 |
| 172  | -765 | -765 | -765 |
| 172  | -765 | -765 | -765 |
| -765 | -765 | -765 | 172  |
| -765 | -765 | 234  | -765 |
| -765 | 134  | -765 | 72   |
| -765 | -765 | -765 | 172  |
| 72   | -765 | 134  | -765 |
| -765 | 234  | -765 | -765 |
| 72   | -765 | -765 | 72   |
| -765 | -765 | -765 | 172  |
| -765 | -765 | 234  | -765 |
| 172  | -765 | -765 | -765 |
| -765 | -765 | -765 | 172  |
| -765 | -765 | 234  | -765 |

ALPHABET= ACGT

>srs5\_007. 9

log-odds matrix: alength= 4 w= 11 n= 1011 bayes= 8. 97871 E= 5. 0e+004

|      |      |      |      |
|------|------|------|------|
| -765 | -765 | -765 | 172  |
| -765 | -765 | 234  | -765 |
| -765 | -765 | -765 | 172  |
| -765 | 234  | -765 | -765 |
| -765 | -765 | -765 | 172  |
| -765 | -765 | -765 | 172  |
| -765 | -765 | -765 | 172  |
| -765 | -765 | -765 | 172  |
| -765 | 134  | 134  | -765 |
| 72   | 134  | -765 | -765 |
| -765 | 234  | -765 | -765 |

ALPHABET= ACGT

>srs5\_009. 1

log-odds matrix: alength= 4 w= 40 n= 806 bayes= 8. 06429 E= 7. 3e+003

|      |      |      |      |
|------|------|------|------|
| -823 | 178  | 78   | -823 |
| -823 | 178  | 78   | -823 |
| 170  | -823 | -823 | -823 |
| -823 | -823 | -823 | 170  |
| 170  | -823 | -823 | -823 |
| 112  | -823 | -823 | 12   |
| -823 | 78   | 178  | -823 |
| 12   | 178  | -823 | -823 |
| -823 | 78   | -823 | 112  |
| 112  | -823 | 78   | -823 |
| 112  | 78   | -823 | -823 |
| 12   | -823 | -823 | 112  |
| -823 | 178  | 78   | -823 |

74203Suppl emental \_CNSmatri ces. pssm. txt

```

-823 -823 -823 170
-823 -823 178 12
-823 -823 236 -823
-823 78 78 12
170 -823 -823 -823
12 -823 78 12
12 178 -823 -823
12 78 -823 12
-823 178 -823 12
-823 -823 -823 170
-823 -823 78 112
12 -823 -823 112
12 78 -823 12
170 -823 -823 -823
-823 236 -823 -823
170 -823 -823 -823
12 -823 -823 112
-823 -823 -823 170
-823 -823 -823 170
112 -823 78 -823
-823 -823 236 -823
12 -823 78 12
12 178 -823 -823
170 -823 -823 -823
-823 -823 -823 170
-823 -823 78 112
-823 -823 -823 170

```

ALPHABET= ACGT

>srsc5\_009. 2

log-odds matrix: alength= 4 w= 10 n= 896 bayes= 8. 21755 E= 1. 5e+004

```

-823 -823 -823 170
-823 236 -823 -823
170 -823 -823 -823
-823 78 -823 112
12 -823 178 -823
-823 -823 -823 170
-823 -823 -823 170
170 -823 -823 -823
-823 236 -823 -823
170 -823 -823 -823

```

ALPHABET= ACGT

>srsc5\_009. 3

log-odds matrix: alength= 4 w= 20 n= 866 bayes= 8. 16825 E= 2. 8e+004

```

-823 -823 236 -823
170 -823 -823 -823
12 78 78 -823
-823 -823 -823 170
-823 78 78 12
112 -823 78 -823
112 -823 78 -823
112 78 -823 -823
170 -823 -823 -823
-823 -823 -823 170
-823 -823 -823 170
-823 -823 78 112
-823 -823 -823 170
12 -823 178 -823
-823 78 -823 112
-823 -823 -823 170

```

74203Suppl emental \_CNSmatri ces. pssm. txt

```
-823 -823 -823 170
-823 78 178 -823
-823 236 -823 -823
170 -823 -823 -823
```

ALPHABET= ACGT

>srs5\_009. 4

log-odds matrix: alength= 4 w= 21 n= 863 bayes= 8.16323 E= 7.9e+004

```
-823 -823 178 12
-823 -823 -823 170
12 -823 -823 112
-823 -823 236 -823
-823 -823 -823 170
-823 78 -823 112
-823 -823 178 12
12 -823 178 -823
170 -823 -823 -823
112 -823 -823 12
-823 -823 -823 170
-823 78 -823 112
-823 236 -823 -823
112 -823 78 -823
12 -823 178 -823
12 -823 78 12
-823 178 -823 12
-823 -823 78 112
170 -823 -823 -823
170 -823 -823 -823
-823 236 -823 -823
```

ALPHABET= ACGT

>srs5\_011. 1

log-odds matrix: alength= 4 w= 30 n= 213 bayes= 6.7211 E= 4.5e+002

```
171 -765 -765 -765
171 -765 -765 -765
171 -765 -765 -765
-765 -765 236 -765
71 -765 136 -765
-765 -765 -765 171
-765 236 -765 -765
-765 -765 -765 171
-765 -765 236 -765
-765 -765 -765 171
71 -765 136 -765
-765 -765 236 -765
171 -765 -765 -765
-765 136 136 -765
-765 236 -765 -765
171 -765 -765 -765
171 -765 -765 -765
-765 -765 -765 171
-765 -765 136 71
-765 -765 236 -765
171 -765 -765 -765
171 -765 -765 -765
171 -765 -765 -765
71 -765 136 -765
-765 -765 236 -765
171 -765 -765 -765
171 -765 -765 -765
```

74203Suppl emental \_CNSmatri ces. pssm. txt

```

171 -765 -765 -765
-765 -765 -765 171

```

ALPHABET= ACGT

>srs5\_011.2

log-odds matrix: alength= 4 w= 10 n= 253 bayes= 6.97154 E= 1.7e+003

```

-765 -765 -765 171
-765 -765 236 -765
171 -765 -765 -765
-765 136 136 -765
-765 236 -765 -765
-765 236 -765 -765
171 -765 -765 -765
171 -765 -765 -765
171 -765 -765 -765
171 -765 -765 -765

```

ALPHABET= ACGT

>srs5\_012.1

log-odds matrix: alength= 4 w= 33 n= 813 bayes= 8.07682 E= 8.5e-003

```

-823 231 -823 -823
174 -823 -823 -823
-823 -823 -823 174
-823 73 173 -823
-823 173 -823 16
-823 -823 -823 174
-823 -823 231 -823
-823 -823 -823 174
-823 173 73 -823
174 -823 -823 -823
-823 -823 -823 174
-823 -823 231 -823
174 -823 -823 -823
174 -823 -823 -823
16 173 -823 -823
-823 -823 -823 174
-823 -823 -823 174
16 -823 173 -823
-823 73 -823 115
-823 -823 231 -823
174 -823 -823 -823
-823 -823 231 -823
115 73 -823 -823
-823 173 -823 16
174 -823 -823 -823
174 -823 -823 -823
-823 231 -823 -823
-823 231 -823 -823
135 -158 -158 -158
16 173 -823 -823
174 -823 -823 -823
-823 -823 -823 174
-823 -823 -823 174

```

ALPHABET= ACGT

>srs5\_012.2

log-odds matrix: alength= 4 w= 32 n= 816 bayes= 8.08215 E= 1.9e+000

```

-823 -823 -823 174
-823 73 -823 115
-823 -823 -823 174

```

74203Suppl emental \_CNSmatri ces. pssm. txt

```

-823 -823 -823 174
-823 173 -823 16
-823 173 73 -823
-823 231 -823 -823
-823 173 -823 16
-823 -823 73 115
-823 173 73 -823
-823 -823 -823 174
-823 -823 173 16
-823 73 -823 115
-823 231 -823 -823
174 -823 -823 -823
174 -823 -823 -823
16 173 -823 -823
-823 -823 -823 174
-823 -823 -823 174
174 -823 -823 -823
16 -823 -823 115
-823 73 173 -823
174 -823 -823 -823
-823 -823 -823 174
-823 231 -823 -823
-823 -823 -823 174
-823 -823 -823 174
-823 -823 -823 174
-823 73 -823 115
-823 -823 231 -823
-823 73 -823 115
-823 -823 231 -823

```

ALPHABET= ACGT

>spsc5\_012. 3

log-odds matrix: al length= 4 w= 10 n= 882 bayes= 8. 19476 E= 9. 1e+003

```

-823 -823 -823 174
-823 -823 -823 174
-823 -823 -823 174
-823 -823 -823 174
16 73 73 -823
-823 -823 -823 174
-823 -823 -823 174
-823 -823 -823 174
-823 231 -823 -823
-823 231 -823 -823

```

ALPHABET= ACGT

>spsc5\_012. 4

log-odds matrix: al length= 4 w= 11 n= 879 bayes= 8. 18982 E= 3. 9e+005

```

-823 -823 231 -823
174 -823 -823 -823
115 -823 -823 16
-823 -823 -823 174
-823 -823 -823 174
115 -823 -823 16
16 -823 73 16
16 73 73 -823
174 -823 -823 -823
-823 -823 231 -823
174 -823 -823 -823

```

ALPHABET= ACGT

74203Suppl emental \_CNSmatri ces. pssm. txt

>srsc5\_012. 5

log-odds matrix: alength= 4 w= 50 n= 762 bayes= 7. 98299 E= 9. 9e+007

|      |      |      |      |
|------|------|------|------|
| -158 | -158 | -158 | 135  |
| -158 | -158 | -158 | 135  |
| -158 | -158 | 186  | -158 |
| -158 | 186  | -158 | -158 |
| 53   | -158 | 99   | -158 |
| -158 | 186  | -158 | -158 |
| 53   | -158 | -158 | 53   |
| 53   | -158 | 99   | -158 |
| -158 | -158 | -158 | 135  |
| -158 | -158 | -158 | 135  |
| -158 | -158 | 186  | -158 |
| -158 | -158 | 186  | -158 |
| -158 | -158 | -158 | 135  |
| -158 | 99   | 99   | -158 |
| 53   | -158 | 99   | -158 |
| -158 | -158 | 99   | 53   |
| -158 | -158 | -158 | 135  |
| -158 | -158 | -158 | 135  |
| -158 | -158 | -158 | 135  |
| -158 | 186  | -158 | -158 |
| -158 | -158 | -158 | 135  |
| 135  | -158 | -158 | -158 |
| 53   | -158 | 99   | -158 |
| -158 | 186  | -158 | -158 |
| -158 | -158 | -158 | 135  |
| -158 | -158 | 186  | -158 |
| 135  | -158 | -158 | -158 |
| -158 | -158 | -158 | 135  |
| -158 | -158 | -158 | 135  |
| -158 | -158 | -158 | 135  |
| -158 | -158 | -158 | 135  |
| -158 | -158 | -158 | 135  |
| -158 | -158 | -158 | 135  |
| -158 | -158 | -158 | 135  |
| -158 | -158 | -158 | 135  |
| -158 | -158 | -158 | 135  |
| -158 | -158 | 186  | -158 |
| -158 | -158 | -158 | 135  |
| -158 | 99   | -158 | 53   |
| -158 | 186  | -158 | -158 |
| -158 | -158 | -158 | 135  |
| -158 | -158 | -158 | 135  |
| 135  | -158 | -158 | -158 |
| -158 | 186  | -158 | -158 |
| -158 | 99   | -158 | 53   |
| 53   | -158 | -158 | 53   |
| -158 | -158 | -158 | 135  |
| -158 | -158 | 186  | -158 |
| -158 | -158 | -158 | 135  |
| 135  | -158 | -158 | -158 |
| -823 | -823 | 173  | 16   |

ALPHABET= ACGT

>srsc5\_012. 6

log-odds matrix: alength= 4 w= 14 n= 870 bayes= 8. 17493 E= 1. 6e+008

|      |      |      |      |
|------|------|------|------|
| -158 | -158 | -158 | 135  |
| -158 | 186  | -158 | -158 |
| -158 | -158 | -158 | 135  |
| 53   | -158 | 99   | -158 |
| 135  | -158 | -158 | -158 |
| -158 | 186  | -158 | -158 |

74203Suppl emental \_CNSmatri ces. pssm. txt

```
-158 -158 -158 135
-158 -158 -158 135
-158 -158 -158 135
-158 -158 -158 135
 53 -158 99 -158
-158 -158 186 -158
-158 -158 -158 135
-158 -158 -158 135
```

ALPHABET= ACGT

>srsc5\_012.7

log-odds matrix: alength= 4 w= 13 n= 873 bayes= 8.17991 E= 1.6e+008

```
-158 -158 -158 135
-158 -158 -158 186 -158
-158 -158 -158 135
-158 -158 -158 135
 53 -158 99 -158
-158 -158 -158 135
-158 -158 -158 135
-158 -158 -158 135
135 -158 -158 -158
-158 -158 -158 135
-158 -158 186 -158
-158 -158 -158 135
-158 -158 -158 135
```

ALPHABET= ACGT

>srsc5\_014.1

log-odds matrix: alength= 4 w= 15 n= 502 bayes= 7.37793 E= 1.5e+004

```
186 -823 -823 -823
-823 -823 -823 157 27
-823 -823 215 -823
-823 -823 -823 186
-823 -823 -823 186
-823 157 -823 27
-823 57 -823 127
-823 157 -823 27
-823 -823 -823 186
-823 -823 -823 186
 27 57 57 -823
186 -823 -823 -823
186 -823 -823 -823
 27 -823 157 -823
186 -823 -823 -823
```

ALPHABET= ACGT

>srsc5\_014.3

log-odds matrix: alength= 4 w= 12 n= 511 bayes= 7.40372 E= 4.6e+004

```
-823 -823 215 -823
 27 -823 -823 127
127 -823 57 -823
-823 -823 -823 186
-823 -823 -823 186
-823 -823 -823 186
-823 -823 -823 186
-823 57 157 -823
-823 57 -823 127
 27 157 -823 -823
-823 -823 -823 186
-823 -823 -823 186
```



ALPHABET= ACGT

&gt;spsc5\_020. 1

log-odds matrix: alength= 4 w= 10 n= 1460 bayes= 8. 92382 E= 1. 2e+006

|      |      |      |      |
|------|------|------|------|
| -823 | -823 | -823 | 192  |
| 192  | -823 | -823 | -823 |
| 192  | -823 | -823 | -823 |
| -823 | -823 | 208  | -823 |
| -823 | -823 | -823 | 192  |
| -823 | -823 | 208  | -823 |
| -158 | -158 | -158 | 151  |
| -158 | -158 | 166  | -158 |
| -158 | 166  | -158 | -158 |
| 192  | -823 | -823 | -823 |

ALPHABET= ACGT

&gt;spsc5\_020. 2

log-odds matrix: alength= 4 w= 14 n= 1448 bayes= 8. 91189 E= 2. 3e+006

|      |      |      |      |
|------|------|------|------|
| -823 | -823 | 208  | -823 |
| -823 | -823 | 208  | -823 |
| 133  | 50   | -823 | -823 |
| 133  | 50   | -823 | -823 |
| 192  | -823 | -823 | -823 |
| 133  | -823 | -823 | 33   |
| -823 | 50   | 50   | 33   |
| 133  | -823 | -823 | 33   |
| -823 | -823 | -823 | 192  |
| -823 | -823 | -823 | 192  |
| 192  | -823 | -823 | -823 |
| -823 | -823 | -823 | 192  |
| 33   | -823 | 150  | -823 |
| -823 | 150  | 50   | -823 |

ALPHABET= ACGT

&gt;spsc5\_022. 1

log-odds matrix: alength= 4 w= 28 n= 1368 bayes= 8. 82972 E= 1. 5e+001

|      |      |      |      |
|------|------|------|------|
| -823 | -823 | -823 | 184  |
| -823 | -823 | -823 | 184  |
| -823 | -823 | -823 | 184  |
| -823 | 217  | -823 | -823 |
| -823 | -823 | -823 | 184  |
| -823 | -823 | 217  | -823 |
| 184  | -823 | -823 | -823 |
| 126  | -823 | -823 | 26   |
| 26   | -823 | 158  | -823 |
| -823 | 217  | -823 | -823 |
| -823 | -823 | -823 | 184  |
| 26   | -823 | 158  | -823 |
| 184  | -823 | -823 | -823 |
| -823 | 59   | -823 | 126  |
| -823 | -823 | -823 | 184  |
| -823 | -823 | 217  | -823 |
| 184  | -823 | -823 | -823 |
| -823 | 217  | -823 | -823 |
| -823 | -823 | -823 | 184  |
| -823 | -823 | -823 | 184  |
| 126  | -823 | 59   | -823 |
| 126  | -823 | -823 | 26   |
| 126  | -823 | 59   | -823 |
| 184  | -823 | -823 | -823 |

74203Suppl emental \_CNSmatri ces. pssm. txt

|      |      |      |      |
|------|------|------|------|
| 184  | -823 | -823 | -823 |
| 184  | -823 | -823 | -823 |
| 126  | 59   | -823 | -823 |
| -823 | 217  | -823 | -823 |

ALPHABET= ACGT

>srsc5\_022. 2

log-odds matri x: al ength= 4 w= 13 n= 1413 bayes= 8. 87652 E= 4. 3e+003

|      |      |      |      |
|------|------|------|------|
| -823 | 217  | -823 | -823 |
| 184  | -823 | -823 | -823 |
| -823 | -823 | -823 | 184  |
| -823 | -823 | -823 | 184  |
| -823 | -823 | -823 | 184  |
| 184  | -823 | -823 | -823 |
| 26   | -823 | -823 | 126  |
| -823 | -823 | -823 | 184  |
| -823 | -823 | -823 | 184  |
| -823 | 217  | -823 | -823 |
| 184  | -823 | -823 | -823 |
| -823 | -823 | -823 | 184  |
| -823 | -823 | -823 | 184  |

ALPHABET= ACGT

>srsc5\_022. 3

log-odds matri x: al ength= 4 w= 13 n= 1413 bayes= 8. 87652 E= 9. 0e+003

|      |      |      |      |
|------|------|------|------|
| -823 | -823 | -823 | 184  |
| -823 | 217  | -823 | -823 |
| 184  | -823 | -823 | -823 |
| -823 | -823 | -823 | 184  |
| 26   | -823 | 158  | -823 |
| -823 | -823 | -823 | 184  |
| -823 | -823 | 158  | 26   |
| -823 | -823 | 217  | -823 |
| -823 | -823 | -823 | 184  |
| -823 | -823 | 217  | -823 |
| 26   | 158  | -823 | -823 |
| -823 | -823 | -823 | 184  |
| -823 | -823 | -823 | 184  |

ALPHABET= ACGT

>srsc5\_022. 4

log-odds matri x: al ength= 4 w= 15 n= 1407 bayes= 8. 87036 E= 4. 1e+004

|      |      |      |      |
|------|------|------|------|
| -823 | 59   | 158  | -823 |
| -823 | -823 | -823 | 184  |
| -823 | -823 | -823 | 184  |
| 184  | -823 | -823 | -823 |
| -823 | -823 | -823 | 184  |
| 26   | -823 | 59   | 26   |
| -823 | -823 | 217  | -823 |
| 184  | -823 | -823 | -823 |
| -823 | 59   | 158  | -823 |
| -823 | -823 | 158  | 26   |
| -823 | -823 | -823 | 184  |
| 26   | -823 | 158  | -823 |
| 184  | -823 | -823 | -823 |
| -823 | -823 | -823 | 184  |
| -823 | -823 | -823 | 184  |

ALPHABET= ACGT

74203Suppl emental \_CNSmatri ces. pssm. txt

>srs5\_022. 5

log-odds matrix: alength= 4 w= 10 n= 1422 bayes= 8. 8857 E= 8. 8e+005

|      |      |      |      |
|------|------|------|------|
| 184  | -823 | -823 | -823 |
| -823 | -823 | -823 | 184  |
| -823 | 217  | -823 | -823 |
| -823 | 158  | -823 | 26   |
| -823 | -823 | -823 | 184  |
| 184  | -823 | -823 | -823 |
| 26   | -823 | -823 | 126  |
| -823 | -823 | 59   | 126  |
| 184  | -823 | -823 | -823 |
| -823 | -823 | -823 | 184  |

ALPHABET= ACGT

>srs5\_022. 6

log-odds matrix: alength= 4 w= 11 n= 1419 bayes= 8. 88264 E= 2. 8e+006

|      |      |      |      |
|------|------|------|------|
| -823 | -823 | -823 | 184  |
| -823 | -823 | 59   | 126  |
| 26   | -823 | 158  | -823 |
| 126  | -823 | -823 | 26   |
| -823 | 217  | -823 | -823 |
| 126  | -823 | -823 | 26   |
| -823 | -823 | -823 | 184  |
| -823 | -823 | 217  | -823 |
| -823 | -823 | -823 | 184  |
| 126  | -823 | 59   | -823 |
| -823 | -823 | -823 | 184  |

ALPHABET= ACGT

>srs5\_022. 7

log-odds matrix: alength= 4 w= 12 n= 1416 bayes= 8. 87958 E= 1. 2e+007

|      |      |      |      |
|------|------|------|------|
| 184  | -823 | -823 | -823 |
| 184  | -823 | -823 | -823 |
| 126  | -823 | 59   | -823 |
| 184  | -823 | -823 | -823 |
| 126  | -823 | -823 | 26   |
| 26   | -823 | 59   | 26   |
| 26   | 158  | -823 | -823 |
| -823 | -823 | -823 | 184  |
| 26   | 158  | -823 | -823 |
| -823 | -823 | -823 | 184  |
| -823 | 59   | -823 | 126  |
| 184  | -823 | -823 | -823 |

ALPHABET= ACGT

>srs5\_024. 1

log-odds matrix: alength= 4 w= 36 n= 619 bayes= 8. 26913 E= 1. 5e+003

|      |      |      |      |
|------|------|------|------|
| 192  | -765 | -765 | -765 |
| 192  | -765 | -765 | -765 |
| 192  | -765 | -765 | -765 |
| -765 | 207  | -765 | -765 |
| 192  | -765 | -765 | -765 |
| -765 | -765 | -765 | 192  |
| -765 | -765 | 207  | -765 |
| 192  | -765 | -765 | -765 |
| -765 | -765 | 207  | -765 |
| 92   | -765 | -765 | 92   |
| -765 | -765 | 207  | -765 |
| -765 | -765 | 207  | -765 |
| -765 | 207  | -765 | -765 |

74203Suppl emental \_CNSmatri ces. pssm. txt

```

-765 -765 -765 192
-765 -765 207 -765
-765 -765 -765 192
192 -765 -765 -765
192 -765 -765 -765
-765 -765 -765 192
-765 -765 207 -765
-765 108 108 -765
-765 -765 108 92
-765 -765 -765 192
-765 -765 207 -765
-765 108 -765 92
-765 -765 -765 192
-765 207 -765 -765
-765 -765 -765 192
-765 207 -765 -765
-765 108 -765 92
192 -765 -765 -765
192 -765 -765 -765
-765 -765 -765 192
-765 -765 -765 192
-765 207 -765 -765
-765 -765 -765 192

```

ALPHABET= ACGT

>srsc5\_024. 2

log-odds matrix: al length= 4 w= 10 n= 671 bayes= 8. 38586 E= 2. 2e+004

```

-765 207 -765 -765
-765 207 -765 -765
-765 207 -765 -765
-765 -765 -765 192
192 -765 -765 -765
192 -765 -765 -765
192 -765 -765 -765
92 -765 -765 92
-765 207 -765 -765
-765 -765 -765 192

```

ALPHABET= ACGT

>srsc6\_001. 1

log-odds matrix: al length= 4 w= 12 n= 1958 bayes= 8. 93221 E= 5. 3e+002

```

-865 -865 -865 178
-865 26 184 -865
-865 -865 -865 178
-865 -865 -865 178
-865 26 -865 136
-865 -865 -865 178
-865 226 -865 -865
-865 -865 -865 178
-865 -865 -865 178
-865 -865 226 -865
-865 26 -865 136
-865 -865 -865 178

```

ALPHABET= ACGT

>srsc6\_001. 2

log-odds matrix: al length= 4 w= 11 n= 1962 bayes= 8. 93517 E= 2. 6e+005

```

178 -865 -865 -865
-865 -865 26 136
-22 -865 -865 136

```

74203Suppl emental \_CNSmatri ces. pssm. txt

```
-199 53 -199 97
-865 226 -865 -865
-865 -865 -865 178
-865 -865 -865 178
-865 -865 -865 178
-865 -865 26 136
-865 -865 -865 178
-865 -865 226 -865
```

ALPHABET= ACGT

>srsc6\_001.3

log-odds matrix: alength= 4 w= 11 n= 1962 bayes= 8.93517 E= 4.9e+010

```
-199 -199 194 -199
150 -199 -199 -199
150 -199 -199 -199
150 -199 -199 -199
-199 -199 53 97
15 -199 140 -199
97 53 -199 -199
97 53 -199 -199
-199 194 -199 -199
-865 -865 -865 178
-865 -865 -865 178
```

ALPHABET= ACGT

>srsc6\_001.6

log-odds matrix: alength= 4 w= 10 n= 1966 bayes= 8.93811 E= 2.9e+011

```
-199 -199 194 -199
15 140 -199 -199
-199 -199 -199 150
150 -199 -199 -199
150 -199 -199 -199
-199 -199 -199 150
15 -199 -199 97
-199 -199 -199 150
-199 -199 194 -199
-199 -199 -199 150
```

ALPHABET= ACGT

>srsc6\_001.8

log-odds matrix: alength= 4 w= 11 n= 1962 bayes= 8.93517 E= 4.6e+011

```
-199 -199 -199 150
-199 194 -199 -199
-199 -199 -199 150
-199 53 -199 97
-199 -199 -199 150
97 -199 53 -199
-100 153 -100 -100
-199 -199 -199 150
-199 -199 -199 150
-199 -199 -199 150
-199 -199 -199 150
```

ALPHABET= ACGT

>srsc6\_004.1

log-odds matrix: alength= 4 w= 30 n= 1049 bayes= 8.4457 E= 6.5e+004

```
-823 -823 209 -823
-823 51 150 -823
133 51 -823 -823
```

74203Suppl emental \_CNSmatri ces. pssm. txt

```

191 -823 -823 -823
 33 -823 51 33
 33 -823 -823 133
-823 209 -823 -823
 33 51 -823 33
 33 -823 51 33
-823 -823 51 133
-823 -823 209 -823
-823 -823 209 -823
-823 -823 150 33
 33 -823 51 33
 191 -823 -823 -823
-823 -823 -823 191
 33 -823 150 -823
-823 -823 -823 191
-823 -823 51 133
-158 -158 -158 151
-823 150 -823 33
 33 -823 150 -823
-823 -823 -823 191
-823 -823 209 -823
 133 -823 51 -823
-823 209 -823 -823
-823 51 -823 133
-823 -823 -823 191
 133 -823 -823 33
-823 -823 -823 191

```

ALPHABET= ACGT

>srsc6\_004. 2

log-odds matrix: alength= 4 w= 13 n= 1100 bayes= 8. 51439 E= 1. 8e+005

```

-823 -823 -823 191
-823 -823 -823 191
 33 51 -823 33
-823 -823 -823 191
-823 51 150 -823
 191 -823 -823 -823
 191 -823 -823 -823
 33 150 -823 -823
 33 -823 -823 133
-823 -823 -823 191
 33 150 -823 -823
 191 -823 -823 -823
-823 -823 209 -823

```

ALPHABET= ACGT

>srsc6\_007. 1

log-odds matrix: alength= 4 w= 21 n= 1428 bayes= 8. 89178 E= 2. 2e+005

```

-823 -823 -823 180
 22 -823 164 -823
-823 164 -823 22
-823 -823 -823 180
-823 -823 -823 180
-823 -823 -823 180
-823 -823 64 121
 121 -823 -823 22
 121 -823 -823 22
-823 64 64 22
-823 -823 223 -823
-823 -823 -823 180
 22 -823 64 22

```

74203Suppl emental \_CNSmatri ces. pssm. txt

|      |      |      |      |
|------|------|------|------|
| 180  | -823 | -823 | -823 |
| -823 | 164  | -823 | 22   |
| -823 | 164  | -823 | 22   |
| -823 | -823 | -823 | 180  |
| -823 | -823 | -823 | 180  |
| -823 | -823 | -823 | 180  |
| 180  | -823 | -823 | -823 |
| 180  | -823 | -823 | -823 |

ALPHABET= ACGT

>srsc6\_007. 4

log-odds matrix: alength= 4 w= 10 n= 1461 bayes= 8.92481 E= 4.9e+005

|      |      |      |      |
|------|------|------|------|
| -823 | 164  | 64   | -823 |
| -823 | 223  | -823 | -823 |
| 180  | -823 | -823 | -823 |
| -823 | -823 | -823 | 180  |
| 121  | 64   | -823 | -823 |
| -823 | -823 | -823 | 180  |
| -823 | -823 | -823 | 180  |
| 121  | -823 | 64   | -823 |
| 180  | -823 | -823 | -823 |
| -823 | -823 | -823 | 180  |

ALPHABET= ACGT

>srsc6\_007. 6

log-odds matrix: alength= 4 w= 11 n= 1458 bayes= 8.92184 E= 3.5e+006

|      |      |      |      |
|------|------|------|------|
| -823 | -823 | -823 | 180  |
| 180  | -823 | -823 | -823 |
| -823 | 64   | -823 | 121  |
| -823 | -823 | -823 | 180  |
| -823 | 64   | -823 | 121  |
| -823 | 64   | 64   | 22   |
| -823 | -823 | -823 | 180  |
| 180  | -823 | -823 | -823 |
| -823 | -823 | -823 | 180  |
| -823 | 164  | -823 | 22   |
| -823 | -823 | -823 | 180  |

ALPHABET= ACGT

>srsc6\_007. 8

log-odds matrix: alength= 4 w= 10 n= 1461 bayes= 8.92481 E= 2.3e+006

|      |      |      |      |
|------|------|------|------|
| -823 | -823 | -823 | 180  |
| -823 | 164  | -823 | 22   |
| 180  | -823 | -823 | -823 |
| 180  | -823 | -823 | -823 |
| 180  | -823 | -823 | -823 |
| 22   | -823 | 164  | -823 |
| 121  | 64   | -823 | -823 |
| 121  | -823 | -823 | 22   |
| -823 | -823 | 223  | -823 |
| 180  | -823 | -823 | -823 |

ALPHABET= ACGT

>srsc6\_007. 9

log-odds matrix: alength= 4 w= 14 n= 1449 bayes= 8.91289 E= 1.8e+007

|      |      |      |     |
|------|------|------|-----|
| -823 | -823 | -823 | 180 |
| -823 | 64   | -823 | 121 |
| -823 | -823 | -823 | 180 |
| -158 | -158 | -158 | 141 |

74203Suppl emental \_CNSmatri ces. pssm. txt

|      |      |      |      |
|------|------|------|------|
| -823 | 164  | -823 | 22   |
| -158 | 179  | -158 | -158 |
| -823 | 164  | -823 | 22   |
| -823 | 223  | -823 | -823 |
| 22   | -823 | -823 | 121  |
| -823 | 64   | 64   | 22   |
| -823 | -823 | -823 | 180  |
| -823 | -823 | -823 | 180  |
| 121  | -823 | -823 | 22   |
| -823 | -823 | -823 | 180  |

ALPHABET= ACGT

>srsc6\_010.1

log-odds matrix: alength= 4 w= 41 n= 1392 bayes= 8.85487 E= 1.3e+002

|      |      |      |      |
|------|------|------|------|
| 171  | -823 | -823 | -823 |
| -823 | 178  | 78   | -823 |
| 112  | -823 | -823 | 12   |
| 12   | -823 | 178  | -823 |
| -823 | 236  | -823 | -823 |
| 171  | -823 | -823 | -823 |
| -823 | 78   | 78   | 12   |
| -823 | -823 | -823 | 171  |
| 171  | -823 | -823 | -823 |
| -823 | 78   | 78   | 12   |
| -823 | 178  | 78   | -823 |
| -823 | -823 | 236  | -823 |
| 171  | -823 | -823 | -823 |
| -823 | -823 | -823 | 171  |
| -823 | -823 | 236  | -823 |
| 171  | -823 | -823 | -823 |
| -823 | 178  | 78   | -823 |
| 171  | -823 | -823 | -823 |
| -823 | 178  | -823 | 12   |
| -823 | -823 | -823 | 171  |
| -158 | -158 | -158 | 133  |
| -823 | -823 | 178  | 12   |
| 12   | -823 | -823 | 112  |
| -823 | -823 | 236  | -823 |
| -158 | 191  | -158 | -158 |
| -823 | -823 | 78   | 112  |
| -823 | 178  | -823 | 12   |
| 171  | -823 | -823 | -823 |
| -823 | 178  | 78   | -823 |
| 171  | -823 | -823 | -823 |
| -823 | -823 | 178  | 12   |
| 171  | -823 | -823 | -823 |
| 12   | 178  | -823 | -823 |
| -823 | -823 | -823 | 171  |
| -823 | 78   | 178  | -823 |
| 12   | 78   | 78   | -823 |
| -158 | -158 | -158 | 133  |
| -823 | -823 | -823 | 171  |
| -823 | 78   | -823 | 112  |
| -823 | -823 | -823 | 171  |
| 171  | -823 | -823 | -823 |

ALPHABET= ACGT

>srsc6\_010.2

log-odds matrix: alength= 4 w= 25 n= 1440 bayes= 8.90388 E= 3.0e+004

|      |      |     |      |
|------|------|-----|------|
| -823 | -823 | 236 | -823 |
| -823 | -823 | 236 | -823 |



74203Suppl emental \_CNSmatri ces. pssm. txt

```

-823    78    -823    112
 171   -823   -823   -823
-823   -823   -823    171
 12    178   -823   -823
-823   -823   -823    171
-823   -823   -823    171
 12    78    -823    12
 171   -823   -823   -823
-823   -823   -823    171
 12    178   -823   -823
-823   -823   -823    171
-823    78   -823    112
 112   -823   -823    12
-823   178   -823    12
 133  -158  -158   -158
-823   -823    236   -823
 12    178   -823   -823
 112   -823   -823    12
 171   -823   -823   -823
-823   -823    78    112
 171   -823   -823   -823
 12    -823   -823    112
-823   -823    236   -823

```

ALPHABET= ACGT

>srsc6\_010.4

log-odds matrix: al length= 4 w= 21 n= 1452 bayes= 8.91588 E= 6.9e+004

```

-823    178    78    -823
-823   -823    78    112
-823   -823   -823    171
-823   -823   -823    171
-823   -823    178    12
-823   -823   -823    171
-158  -158    103    51
 171   -823   -823   -823
 12    178   -823   -823
-823    236   -823   -823
-823   -823   -823    171
 171   -823   -823   -823
 171   -823   -823   -823
-823    178   -823    12
 171   -823   -823   -823
 12    -823   -823    112
-823    178    78   -823
 171   -823   -823   -823
 12    -823   -823    112
-158  -158    191   -158
-823    236   -823   -823

```

ALPHABET= ACGT

>srsc6\_010.5

log-odds matrix: al length= 4 w= 11 n= 1482 bayes= 8.94544 E= 1.6e+006

```

-823   -823   -823    171
 12   -823    178   -823
-823   -823   -823    171
 171   -823   -823   -823
-823    178    78   -823
-823   -823   -823    171
 171   -823   -823   -823
 112   -823   -823    12
 12   -823    178   -823

```

74203Suppl emental \_CNSmatri ces. pssm. txt

```
-823 178 78 -823
171 -823 -823 -823
```

ALPHABET= ACGT

>srsc6\_016. 1

log-odds matrix: alength= 4 w= 24 n= 1210 bayes= 8.23601 E= 2.5e-001

```
184 -865 -865 -865
-865 17 -865 143
184 -865 -865 -865
-865 -865 217 -865
-865 217 -865 -865
184 -865 -865 -865
-15 175 -865 -865
184 -865 -865 -865
-15 117 -865 -15
-15 175 -865 -865
84 -865 117 -865
84 -865 117 -865
-865 217 -865 -865
143 -865 17 -865
84 -865 -865 84
-865 -865 -865 184
-865 217 -865 -865
184 -865 -865 -865
-15 -865 175 -865
-865 -865 -865 184
-865 -865 117 84
-15 -865 175 -865
-865 -865 -865 184
-865 -865 17 143
```

ALPHABET= ACGT

>srsc6\_016. 3

log-odds matrix: alength= 4 w= 29 n= 1190 bayes= 8.21189 E= 3.5e+009

```
-865 175 17 -865
-865 -865 -865 184
-865 -865 217 -865
-865 -865 175 -15
156 -199 -199 -199
156 -199 -199 -199
20 132 -199 -199
103 -199 -199 20
-199 -199 -199 156
-199 -199 46 103
-199 132 -199 20
103 46 -199 -199
-199 -199 -199 156
-199 -199 46 103
-199 46 132 -199
-199 132 -199 20
-199 46 -199 103
-199 -199 -199 156
-199 132 46 -199
20 46 46 -199
-199 -199 46 103
-199 -199 186 -199
20 -199 132 -199
156 -199 -199 -199
-199 -199 -199 156
20 -199 132 -199
-199 -199 -199 156
```

74203Suppl emental \_CNSmatri ces. pssm. txt

-15 -865 175 -865  
 184 -865 -865 -865

ALPHABET= ACGT

>srsc6\_016.4

log-odds matrix: alength= 4 w= 50 n= 1106 bayes= 8.10591 E= 8.9e+009

|      |      |      |      |
|------|------|------|------|
| 156  | -199 | -199 | -199 |
| -199 | -199 | -199 | 156  |
| -199 | 186  | -199 | -199 |
| -199 | 186  | -199 | -199 |
| 156  | -199 | -199 | -199 |
| -199 | 46   | -199 | 103  |
| 20   | -199 | 132  | -199 |
| 156  | -199 | -199 | -199 |
| -199 | 46   | -199 | 103  |
| -199 | -199 | 132  | 20   |
| 156  | -199 | -199 | -199 |
| 156  | -199 | -199 | -199 |
| 20   | -199 | 132  | -199 |
| 20   | -199 | -199 | 103  |
| -199 | 46   | -199 | 103  |
| -199 | 186  | -199 | -199 |
| 156  | -199 | -199 | -199 |
| -199 | 46   | -199 | 103  |
| -199 | -199 | 132  | 20   |
| 103  | -199 | 46   | -199 |
| 156  | -199 | -199 | -199 |
| 20   | 132  | -199 | -199 |
| 103  | -199 | -199 | 20   |
| 156  | -199 | -199 | -199 |
| 20   | -199 | -199 | 103  |
| -199 | 46   | -199 | 103  |
| -199 | 46   | -199 | 103  |
| 103  | 46   | -199 | -199 |
| 20   | -199 | -199 | 103  |
| 20   | -199 | -199 | 103  |
| 20   | -199 | -199 | 103  |
| 103  | -199 | 46   | -199 |
| -15  | 17   | -865 | 84   |
| -865 | 17   | 17   | 84   |
| -15  | -865 | 175  | -865 |
| -15  | -865 | -865 | 143  |
| -865 | -865 | 17   | 143  |
| -865 | 175  | 17   | -865 |
| 84   | -865 | -865 | 84   |
| -15  | 17   | -865 | 84   |
| -15  | 175  | -865 | -865 |
| 143  | 17   | -865 | -865 |
| 84   | 17   | 17   | -865 |
| 143  | -865 | -865 | -15  |
| 143  | -865 | -865 | -15  |
| 84   | 17   | 17   | -865 |
| -865 | -865 | 17   | 143  |
| -865 | 217  | -865 | -865 |
| 184  | -865 | -865 | -865 |
| 184  | -865 | -865 | -865 |

ALPHABET= ACGT

>srsc6\_016.5

log-odds matrix: alength= 4 w= 10 n= 1266 bayes= 8.3015 E= 1.6e+008

|      |      |     |      |
|------|------|-----|------|
| -199 | -199 | 186 | -199 |
|------|------|-----|------|

74203Suppl emental \_CNSmatri ces. pssm. txt

|      |      |      |      |
|------|------|------|------|
| 156  | -199 | -199 | -199 |
| -199 | -199 | 46   | 103  |
| -199 | -199 | 186  | -199 |
| -15  | 117  | -865 | -15  |
| -15  | -865 | 175  | -865 |
| -865 | -865 | -865 | 184  |
| -865 | -865 | -865 | 184  |
| -865 | 17   | 17   | 84   |
| -865 | -865 | 217  | -865 |

ALPHABET= ACGT

>srsc6\_016.7

log-odds matrix: alength= 4 w= 11 n= 1262 bayes= 8.29692 E= 5.0e+010

|      |      |      |      |
|------|------|------|------|
| -199 | -199 | 186  | -199 |
| -199 | 46   | 46   | 20   |
| -199 | -199 | -199 | 156  |
| 156  | -199 | -199 | -199 |
| -199 | -199 | 132  | 20   |
| 20   | -199 | 132  | -199 |
| -199 | 132  | -199 | 20   |
| -199 | -199 | 186  | -199 |
| 103  | -199 | 46   | -199 |
| -199 | -199 | 186  | -199 |
| 156  | -199 | -199 | -199 |

ALPHABET= ACGT

>srsc6\_018.10

log-odds matrix: alength= 4 w= 10 n= 1200 bayes= 8.64024 E= 4.6e+006

|      |      |      |      |
|------|------|------|------|
| -823 | -823 | 229  | -823 |
| -823 | -823 | 170  | 17   |
| -158 | -158 | -158 | 137  |
| 117  | -823 | -823 | 17   |
| -158 | -158 | -158 | 137  |
| -158 | 97   | -158 | 55   |
| -823 | 229  | -823 | -823 |
| -823 | -823 | -823 | 175  |
| -823 | -823 | -823 | 175  |
| -823 | -823 | -823 | 175  |

ALPHABET= ACGT

>srsc6\_018.1

log-odds matrix: alength= 4 w= 18 n= 1176 bayes= 8.61102 E= 1.8e+002

|      |      |      |      |
|------|------|------|------|
| 175  | -823 | -823 | -823 |
| -823 | 229  | -823 | -823 |
| -823 | 170  | -823 | 17   |
| -823 | -823 | -823 | 175  |
| 17   | 70   | -823 | 17   |
| -823 | 229  | -823 | -823 |
| -823 | 170  | -823 | 17   |
| -823 | -823 | -823 | 175  |
| -823 | -823 | -823 | 175  |
| -823 | -823 | -823 | 175  |
| -823 | 229  | -823 | -823 |
| 175  | -823 | -823 | -823 |
| 17   | -823 | 170  | -823 |
| 175  | -823 | -823 | -823 |
| -823 | -823 | -823 | 175  |
| -823 | 229  | -823 | -823 |
| -823 | -823 | -823 | 175  |
| 175  | -823 | -823 | -823 |

ALPHABET= ACGT

&gt;srsc6\_018. 2

log-odds matrix: alength= 4 w= 11 n= 1197 bayes= 8. 63662 E= 2. 0e+004

|      |      |      |      |
|------|------|------|------|
| -823 | -823 | 229  | -823 |
| -823 | 70   | -823 | 117  |
| 117  | -823 | -823 | 17   |
| -823 | -823 | 70   | 117  |
| 175  | -823 | -823 | -823 |
| -823 | 229  | -823 | -823 |
| -823 | -823 | -823 | 175  |
| -823 | -823 | -823 | 175  |
| -823 | -823 | 229  | -823 |
| -823 | -823 | -823 | 175  |
| -823 | -823 | 229  | -823 |

ALPHABET= ACGT

&gt;srsc6\_018. 5

log-odds matrix: alength= 4 w= 11 n= 1197 bayes= 8. 63662 E= 1. 7e+005

|      |      |      |      |
|------|------|------|------|
| -823 | -823 | -823 | 175  |
| -823 | -823 | 229  | -823 |
| -823 | -823 | 229  | -823 |
| -823 | 70   | -823 | 117  |
| -823 | 70   | -823 | 117  |
| 17   | -823 | -823 | 117  |
| -823 | -823 | -823 | 175  |
| 117  | -823 | 70   | -823 |
| 17   | -823 | 170  | -823 |
| -823 | -823 | 229  | -823 |
| -823 | -823 | 229  | -823 |

ALPHABET= ACGT

&gt;srsc6\_018. 6

log-odds matrix: alength= 4 w= 11 n= 1197 bayes= 8. 63662 E= 2. 3e+005

|      |      |      |      |
|------|------|------|------|
| -823 | 70   | 170  | -823 |
| -823 | 229  | -823 | -823 |
| -823 | -823 | -823 | 175  |
| 117  | -823 | 70   | -823 |
| -823 | 229  | -823 | -823 |
| 17   | 170  | -823 | -823 |
| 175  | -823 | -823 | -823 |
| -158 | -158 | 97   | 55   |
| 117  | -823 | 70   | -823 |
| -823 | 229  | -823 | -823 |
| -823 | -823 | -823 | 175  |

ALPHABET= ACGT

&gt;srsc6\_018. 9

log-odds matrix: alength= 4 w= 11 n= 1197 bayes= 8. 63662 E= 4. 4e+006

|      |      |      |      |
|------|------|------|------|
| 175  | -823 | -823 | -823 |
| -823 | -823 | -823 | 175  |
| -823 | -823 | 229  | -823 |
| 137  | -158 | -158 | -158 |
| 17   | 170  | -823 | -823 |
| -823 | -823 | -823 | 175  |
| 17   | -823 | -823 | 117  |
| -158 | -158 | 97   | 55   |
| 17   | -823 | -823 | 117  |
| -823 | 170  | -823 | 17   |

-823 229 -823

-823

ALPHABET= ACGT

&gt;srsc6\_020. 1

log-odds matrix: alength= 4 w= 33 n= 594 bayes= 8.20945 E= 2.0e+003

|      |      |      |      |
|------|------|------|------|
| 184  | -765 | -765 | -765 |
| -765 | -765 | -765 | 184  |
| 184  | -765 | -765 | -765 |
| -765 | -765 | 217  | -765 |
| -765 | 217  | -765 | -765 |
| 184  | -765 | -765 | -765 |
| 84   | 117  | -765 | -765 |
| 84   | -765 | 117  | -765 |
| -765 | -765 | -765 | 184  |
| -765 | -765 | -765 | 184  |
| -765 | -765 | 217  | -765 |
| 184  | -765 | -765 | -765 |
| -765 | -765 | -765 | 184  |
| -765 | -765 | 217  | -765 |
| 184  | -765 | -765 | -765 |
| -765 | -765 | -765 | 184  |
| -765 | -765 | 217  | -765 |
| 184  | -765 | -765 | -765 |
| 84   | 117  | -765 | -765 |
| -765 | -765 | -765 | 184  |
| -765 | -765 | -765 | 184  |
| -765 | -765 | 217  | -765 |
| -765 | -765 | -765 | 184  |
| -765 | -765 | -765 | 184  |
| 84   | -765 | 117  | -765 |
| -765 | 217  | -765 | -765 |
| 184  | -765 | -765 | -765 |
| 184  | -765 | -765 | -765 |
| -765 | -765 | -765 | 184  |
| -765 | -765 | 217  | -765 |
| -765 | 217  | -765 | -765 |

ALPHABET= ACGT

&gt;srsc6\_020. 4

log-odds matrix: alength= 4 w= 10 n= 640 bayes= 8.31741 E= 5.7e+004

|      |      |      |      |
|------|------|------|------|
| -765 | -765 | -765 | 184  |
| 184  | -765 | -765 | -765 |
| 84   | -765 | 117  | -765 |
| -765 | -765 | -765 | 184  |
| -765 | 117  | 117  | -765 |
| 184  | -765 | -765 | -765 |
| -765 | -765 | 217  | -765 |
| 184  | -765 | -765 | -765 |
| 184  | -765 | -765 | -765 |
| 184  | -765 | -765 | -765 |

ALPHABET= ACGT

&gt;srsc6\_020. 6

log-odds matrix: alength= 4 w= 10 n= 640 bayes= 8.31741 E= 6.5e+004

|      |      |      |      |
|------|------|------|------|
| 184  | -765 | -765 | -765 |
| -765 | -765 | -765 | 184  |
| -765 | -765 | -765 | 184  |
| -765 | -765 | 117  | 84   |

74203Suppl emental \_CNSmatri ces. pssm. txt

|      |      |      |      |
|------|------|------|------|
| -765 | -765 | 217  | -765 |
| -765 | -765 | -765 | 184  |
| 84   | 117  | -765 | -765 |
| 84   | -765 | -765 | 84   |
| -765 | -765 | 217  | -765 |
| -765 | 217  | -765 | -765 |

ALPHABET= ACGT

>srsc6\_020.7

log-odds matrix: alength= 4 w= 11 n= 638 bayes= 8.31288 E= 1.6e+005

|      |      |      |      |
|------|------|------|------|
| 184  | -765 | -765 | -765 |
| -765 | -765 | -765 | 184  |
| -765 | -765 | -765 | 184  |
| 84   | -765 | -765 | 84   |
| 84   | -765 | -765 | 84   |
| 84   | 117  | -765 | -765 |
| 184  | -765 | -765 | -765 |
| 184  | -765 | -765 | -765 |
| 184  | -765 | -765 | -765 |
| 184  | -765 | -765 | -765 |
| 184  | -765 | -765 | -765 |

ALPHABET= ACGT

>srsc6\_022.1

log-odds matrix: alength= 4 w= 31 n= 612 bayes= 8.25267 E= 1.9e+002

|      |      |      |      |
|------|------|------|------|
| -765 | -765 | -765 | 187  |
| -765 | 213  | -765 | -765 |
| 187  | -765 | -765 | -765 |
| -765 | 213  | -765 | -765 |
| 187  | -765 | -765 | -765 |
| 87   | -765 | 113  | -765 |
| -765 | -765 | -765 | 187  |
| 187  | -765 | -765 | -765 |
| -765 | -765 | 213  | -765 |
| -765 | -765 | 213  | -765 |
| 187  | -765 | -765 | -765 |
| 187  | -765 | -765 | -765 |
| 187  | -765 | -765 | -765 |
| -765 | -765 | -765 | 187  |
| -765 | -765 | 213  | -765 |
| -765 | 213  | -765 | -765 |
| -765 | 213  | -765 | -765 |
| 187  | -765 | -765 | -765 |
| 187  | -765 | -765 | -765 |
| 187  | -765 | -765 | -765 |
| -765 | -765 | 213  | -765 |
| -765 | -765 | -765 | 187  |
| 187  | -765 | -765 | -765 |
| -765 | -765 | -765 | 187  |
| -765 | 213  | -765 | -765 |
| 187  | -765 | -765 | -765 |
| -765 | 213  | -765 | -765 |
| -765 | -765 | -765 | 187  |
| 187  | -765 | -765 | -765 |
| -765 | -765 | -765 | 187  |
| -765 | 213  | -765 | -765 |

ALPHABET= ACGT

>srsc6\_022.2

log-odds matrix: alength= 4 w= 19 n= 636 bayes= 8.30834 E= 1.3e+004

74203Suppl emental \_CNSmatri ces. pssm. txt

```

187 -765 -765 -765
-765 -765 -765 187
-765 -765 -765 213
-765 -765 -765 187
-765 -765 -765 187
-765 -765 -765 187
-765 213 -765 -765
-765 -765 -765 187
-765 -765 -765 187
-765 -765 -765 187
187 -765 -765 -765
-765 113 -765 87
187 -765 -765 -765
187 -765 -765 -765
-765 213 -765 -765
-765 113 -765 87
-765 -765 -765 187
-765 -765 213 -765
-765 -765 -765 187

```

ALPHABET= ACGT

>srs7\_001. 1

log-odds matrix: alength= 4 w= 11 n= 511 bayes= 7.99152 E= 1.6e+004

```

-765 -765 229 -765
-765 -765 129 75
175 -765 -765 -765
175 -765 -765 -765
175 -765 -765 -765
-765 -765 -765 175
175 -765 -765 -765
75 -765 129 -765
175 -765 -765 -765
-765 -765 229 -765
-765 -765 229 -765

```

ALPHABET= ACGT

>srs7\_002. 1

log-odds matrix: alength= 4 w= 35 n= 1245 bayes= 8.69349 E= 1.0e-001

```

-823 -823 -823 164
-823 -823 -823 164
-823 -823 88 106
-823 88 -823 106
-823 88 188 -823
-823 188 -823 6
-823 -823 -823 164
6 -823 -823 106
-823 -823 -823 164
-823 -823 247 -823
-823 -823 -823 164
-823 88 -823 106
106 -823 88 -823
164 -823 -823 -823
6 -823 -823 106
-823 -823 247 -823
-823 -823 247 -823
164 -823 -823 -823
164 -823 -823 -823
6 188 -823 -823
-823 -823 -823 164
-823 188 -823 6
6 188 -823 -823

```



74203Suppl emental \_CNSmatri ces. pssm. txt

```

164 -823 -823 -823
-823 -823 -823 164
-823 -823 247 -823
164 -823 -823 -823
-823 -823 247 -823
-823 -823 247 -823
-823 -823 -823 164
-823 -823 247 -823
164 -823 -823 -823
-823 188 -823 6
106 88 -823 -823
-823 247 -823 -823

```

ALPHABET= ACGT

>srsc7\_002. 2

log-odds matrix: alength= 4 w= 10 n= 1320 bayes= 8. 77808 E= 7. 6e+002

```

-823 -823 247 -823
-823 -823 -823 164
-823 -823 247 -823
-823 247 -823 -823
164 -823 -823 -823
6 -823 88 6
-823 -823 247 -823
164 -823 -823 -823
-823 -823 -823 164
-823 -823 247 -823

```

ALPHABET= ACGT

>srsc7\_002. 3

log-odds matrix: alength= 4 w= 15 n= 1305 bayes= 8. 76155 E= 3. 1e+004

```

-823 -823 247 -823
-823 247 -823 -823
-823 -823 -823 164
106 -823 88 -823
-823 -823 188 6
-823 -823 -823 164
164 -823 -823 -823
6 -823 -823 106
-823 -823 -823 164
-823 247 -823 -823
-823 88 -823 106
-823 88 88 6
-823 -823 -823 164
-823 -823 -823 164
-823 -823 -823 164

```

ALPHABET= ACGT

>srsc7\_002. 5

log-odds matrix: alength= 4 w= 11 n= 1317 bayes= 8. 77479 E= 4. 9e+004

```

-823 -823 -823 164
-823 -823 88 106
-823 -823 247 -823
-823 247 -823 -823
106 -823 -823 6
6 -823 -823 106
-823 -823 247 -823
-823 188 88 -823
-823 -823 188 6
-823 -823 247 -823
164 -823 -823 -823

```

ALPHABET= ACGT

&gt;srsc7\_002. 6

log-odds matrix: alength= 4 w= 12 n= 1314 bayes= 8. 77149 E= 8. 8e+004

|      |      |      |      |
|------|------|------|------|
| 164  | -823 | -823 | -823 |
| 164  | -823 | -823 | -823 |
| 106  | -823 | 88   | -823 |
| -823 | -823 | -823 | 164  |
| 106  | -823 | 88   | -823 |
| -823 | -823 | 247  | -823 |
| 106  | 88   | -823 | -823 |
| -823 | -823 | -823 | 164  |
| -823 | -823 | 247  | -823 |
| -823 | -823 | -823 | 164  |
| 164  | -823 | -823 | -823 |
| -823 | 88   | 188  | -823 |

ALPHABET= ACGT

&gt;srsc7\_002. 8

log-odds matrix: alength= 4 w= 11 n= 1317 bayes= 8. 77479 E= 1. 9e+005

|      |      |      |      |
|------|------|------|------|
| -823 | -823 | -823 | 164  |
| -823 | -823 | 188  | 6    |
| -823 | 88   | -823 | 106  |
| -823 | -823 | -823 | 164  |
| -823 | -823 | 247  | -823 |
| -823 | 188  | -823 | 6    |
| 164  | -823 | -823 | -823 |
| 164  | -823 | -823 | -823 |
| 164  | -823 | -823 | -823 |
| -823 | -823 | -823 | 164  |
| -823 | -823 | -823 | 164  |

ALPHABET= ACGT

&gt;srsc7\_002. 9

log-odds matrix: alength= 4 w= 20 n= 1290 bayes= 8. 74483 E= 2. 2e+005

|      |      |      |      |
|------|------|------|------|
| -823 | -823 | -823 | 164  |
| -823 | -823 | -823 | 164  |
| -823 | -823 | -823 | 164  |
| 106  | -823 | -823 | 6    |
| -823 | 88   | -823 | 106  |
| -823 | -823 | -823 | 164  |
| 106  | -823 | -823 | 6    |
| -823 | 88   | 88   | 6    |
| -823 | 247  | -823 | -823 |
| 6    | 88   | -823 | 6    |
| 6    | -823 | -823 | 106  |
| -823 | -823 | 247  | -823 |
| -823 | 188  | 88   | -823 |
| -823 | -823 | -823 | 164  |
| -823 | 88   | -823 | 106  |
| -823 | 247  | -823 | -823 |
| 46   | -158 | 112  | -158 |
| -158 | -158 | -158 | 127  |
| -823 | -823 | -823 | 164  |
| -823 | -823 | 247  | -823 |

ALPHABET= ACGT

&gt;srsc7\_004. 10

log-odds matrix: alength= 4 w= 15 n= 1535 bayes= 8. 99624 E= 1. 1e+005

74203Suppl emental \_CNSmatri ces. pssm. txt

```

-823 -823 -823 168
168 -823 -823 -823
-823 81 181 -823
-823 -823 81 110
10 181 -823 -823
10 181 -823 -823
-823 240 -823 -823
-823 81 -823 110
110 -823 -823 10
10 181 -823 -823
168 -823 -823 -823
-823 181 81 -823
-823 240 -823 -823
-823 240 -823 -823
168 -823 -823 -823

```

ALPHABET= ACGT

>srsc7\_004.1

log-odds matrix: alength= 4 w= 16 n= 1532 bayes= 8.99341 E= 4.0e+002

```

-823 -823 -823 168
-823 240 -823 -823
-823 181 81 -823
168 -823 -823 -823
-823 -823 -823 168
-823 -823 -823 168
-823 -823 -823 168
-823 -823 -823 168
-823 240 -823 -823
-823 -823 -823 168
-823 -823 240 -823
-823 -823 -823 168
-823 -823 -823 168
110 -823 -823 10
-823 240 -823 -823
110 81 -823 -823
168 -823 -823 -823

```

ALPHABET= ACGT

>srsc7\_004.2

log-odds matrix: alength= 4 w= 20 n= 1520 bayes= 8.98204 E= 6.8e+003

```

-823 240 -823 -823
10 81 -823 10
168 -823 -823 -823
-823 181 81 -823
10 81 -823 10
110 -823 81 -823
168 -823 -823 -823
168 -823 -823 -823
-823 -823 81 110
-823 240 -823 -823
-823 240 -823 -823
168 -823 -823 -823
168 -823 -823 -823
-823 -823 181 10
168 -823 -823 -823
168 -823 -823 -823
168 -823 -823 -823
-823 81 181 -823
-823 -823 -823 168
-823 81 181 -823

```

ALPHABET= ACGT

&gt;srsc7\_004. 3

log-odds matrix: alength= 4 w= 14 n= 1538 bayes= 8.99906 E= 1.8e+004

|      |      |      |      |
|------|------|------|------|
| -823 | -823 | 240  | -823 |
| -823 | -823 | -823 | 168  |
| -823 | 240  | -823 | -823 |
| 110  | -823 | -823 | 10   |
| -823 | -823 | -823 | 168  |
| 168  | -823 | -823 | -823 |
| 168  | -823 | -823 | -823 |
| 168  | -823 | -823 | -823 |
| -823 | -823 | 181  | 10   |
| 10   | -823 | 181  | -823 |
| -823 | -823 | 240  | -823 |
| -823 | -823 | 81   | 110  |
| -823 | -823 | -823 | 168  |
| -823 | -823 | -823 | 168  |

ALPHABET= ACGT

&gt;srsc7\_004. 4

log-odds matrix: alength= 4 w= 24 n= 1508 bayes= 8.97059 E= 1.3e+004

|      |      |      |      |
|------|------|------|------|
| 168  | -823 | -823 | -823 |
| 168  | -823 | -823 | -823 |
| -823 | 181  | 81   | -823 |
| 110  | -823 | -823 | 10   |
| -823 | -823 | -823 | 168  |
| -823 | 240  | -823 | -823 |
| 168  | -823 | -823 | -823 |
| 10   | 81   | -823 | 10   |
| 168  | -823 | -823 | -823 |
| -823 | -823 | 81   | 110  |
| 110  | -823 | -823 | 10   |
| -823 | 240  | -823 | -823 |
| 10   | 81   | -823 | 10   |
| 110  | -823 | -823 | 10   |
| 168  | -823 | -823 | -823 |
| 10   | -823 | -823 | 110  |
| -823 | 81   | 181  | -823 |
| -823 | -823 | 240  | -823 |
| 168  | -823 | -823 | -823 |
| 10   | 81   | 81   | -823 |
| 168  | -823 | -823 | -823 |
| 168  | -823 | -823 | -823 |
| -823 | -823 | -823 | 168  |
| -823 | -823 | 240  | -823 |

ALPHABET= ACGT

&gt;srsc7\_004. 5

log-odds matrix: alength= 4 w= 10 n= 1550 bayes= 9.01029 E= 1.2e+004

|      |      |      |      |
|------|------|------|------|
| -823 | -823 | 240  | -823 |
| 168  | -823 | -823 | -823 |
| 10   | -823 | -823 | 110  |
| -823 | -823 | 240  | -823 |
| -823 | 240  | -823 | -823 |
| -823 | -823 | -823 | 168  |
| 168  | -823 | -823 | -823 |
| -823 | -823 | 181  | 10   |
| -823 | -823 | 240  | -823 |
| 168  | -823 | -823 | -823 |

ALPHABET= ACGT

&gt;srsc7\_004. 7

log-odds matrix: alength= 4 w= 13 n= 1541 bayes= 9. 00188 E= 3. 6e+004

|      |      |      |      |
|------|------|------|------|
| -823 | 240  | -823 | -823 |
| 168  | -823 | -823 | -823 |
| 10   | 181  | -823 | -823 |
| 168  | -823 | -823 | -823 |
| -823 | -823 | -823 | 168  |
| -823 | 81   | -823 | 110  |
| 168  | -823 | -823 | -823 |
| -823 | 240  | -823 | -823 |
| -823 | -823 | -823 | 168  |
| -823 | -823 | 181  | 10   |
| 10   | -823 | -823 | 110  |
| 168  | -823 | -823 | -823 |
| -823 | 240  | -823 | -823 |

ALPHABET= ACGT

&gt;srsc7\_005. 1

log-odds matrix: alength= 4 w= 15 n= 825 bayes= 8. 09803 E= 1. 6e+004

|      |      |      |      |
|------|------|------|------|
| -823 | 224  | -823 | -823 |
| -823 | -823 | -823 | 179  |
| -823 | 165  | -823 | 21   |
| -823 | 165  | -823 | 21   |
| 120  | -823 | -823 | 21   |
| 179  | -823 | -823 | -823 |
| -823 | 66   | -823 | 120  |
| 179  | -823 | -823 | -823 |
| -823 | -823 | -823 | 179  |
| 21   | 66   | -823 | 21   |
| -823 | -823 | -823 | 179  |
| -823 | -823 | -823 | 179  |
| -823 | -823 | -823 | 179  |
| -823 | 224  | -823 | -823 |
| 179  | -823 | -823 | -823 |

ALPHABET= ACGT

&gt;srsc7\_005. 2

log-odds matrix: alength= 4 w= 13 n= 831 bayes= 8. 10852 E= 3. 6e+004

|      |      |      |      |
|------|------|------|------|
| -823 | -823 | -823 | 179  |
| -823 | -823 | -823 | 179  |
| -823 | -823 | 165  | 21   |
| -823 | -823 | 66   | 120  |
| -823 | -823 | 165  | 21   |
| 179  | -823 | -823 | -823 |
| 179  | -823 | -823 | -823 |
| -823 | -823 | -823 | 179  |
| -823 | 66   | 165  | -823 |
| 179  | -823 | -823 | -823 |
| 179  | -823 | -823 | -823 |
| -823 | 66   | -823 | 120  |
| -823 | 224  | -823 | -823 |

ALPHABET= ACGT

&gt;srsc7\_005. 3

log-odds matrix: alength= 4 w= 10 n= 840 bayes= 8. 12412 E= 6. 2e+004

|      |      |      |      |
|------|------|------|------|
| -823 | -823 | -823 | 179  |
| -823 | -823 | 224  | -823 |
| -823 | -823 | -823 | 179  |
| 120  | -823 | 66   | -823 |

74203Suppl emental \_CNSmatri ces. pssm. txt

|      |      |      |      |
|------|------|------|------|
| -823 | -823 | 224  | -823 |
| 179  | -823 | -823 | -823 |
| 21   | 165  | -823 | -823 |
| 120  | -823 | -823 | 21   |
| 21   | 165  | -823 | -823 |
| -823 | -823 | 224  | -823 |

ALPHABET= ACGT

>srs7\_005. 6

log-odds matrix: alength= 4 w= 10 n= 840 bayes= 8. 12412 E= 1. 3e+006

|      |      |      |      |
|------|------|------|------|
| 179  | -823 | -823 | -823 |
| 120  | -823 | 66   | -823 |
| -823 | 165  | -823 | 21   |
| 21   | -823 | -823 | 120  |
| 21   | 165  | -823 | -823 |
| -823 | 165  | 66   | -823 |
| -823 | -823 | -823 | 179  |
| -823 | -823 | 66   | 120  |
| -823 | -823 | 224  | -823 |
| 179  | -823 | -823 | -823 |

ALPHABET= ACGT

>srs7\_006. 1

log-odds matrix: alength= 4 w= 28 n= 1565 bayes= 8. 60825 E= 3. 6e+002

|      |      |      |      |
|------|------|------|------|
| -865 | -865 | 245  | -865 |
| 124  | 45   | -865 | -865 |
| 165  | -865 | -865 | -865 |
| 124  | 45   | -865 | -865 |
| -34  | -865 | -865 | 124  |
| -865 | 204  | 45   | -865 |
| 124  | 45   | -865 | -865 |
| -865 | -865 | -865 | 165  |
| -865 | -865 | 245  | -865 |
| -865 | -865 | 45   | 124  |
| -865 | 145  | -865 | 65   |
| 165  | -865 | -865 | -865 |
| 65   | 45   | -865 | -34  |
| -865 | -865 | -865 | 165  |
| -865 | -865 | 204  | -34  |
| 165  | -865 | -865 | -865 |
| -34  | -865 | 145  | -34  |
| -34  | -865 | 204  | -865 |
| 165  | -865 | -865 | -865 |
| -34  | -865 | 45   | 65   |
| 124  | -865 | -865 | -34  |
| 165  | -865 | -865 | -865 |
| -34  | 204  | -865 | -865 |
| 124  | -865 | -865 | -34  |
| -865 | 45   | 204  | -865 |
| 124  | -865 | 45   | -865 |
| 124  | -865 | -865 | -34  |
| -865 | -865 | -865 | 165  |

ALPHABET= ACGT

>srs7\_006. 4

log-odds matrix: alength= 4 w= 15 n= 1617 bayes= 8. 65553 E= 3. 9e+004

|      |      |      |      |
|------|------|------|------|
| -865 | 245  | -865 | -865 |
| -34  | 45   | -865 | 65   |
| -865 | -865 | -865 | 165  |
| 165  | -865 | -865 | -865 |

74203Suppl emental \_CNSmatri ces. pssm. txt

|      |      |      |      |
|------|------|------|------|
| -34  | -865 | 45   | 65   |
| -865 | -865 | -865 | 165  |
| -865 | 45   | -865 | 124  |
| -865 | -865 | -865 | 165  |
| 124  | -865 | 45   | -865 |
| -865 | -865 | 245  | -865 |
| -865 | 145  | -865 | 65   |
| -865 | 145  | -865 | 65   |
| 165  | -865 | -865 | -865 |
| -865 | 45   | 45   | 65   |
| -865 | -865 | 245  | -865 |

ALPHABET= ACGT

>srsc7\_006. 8

log-odds matrix: alength= 4 w= 15 n= 1617 bayes= 8. 65553 E= 1. 3e+006

|      |      |      |      |
|------|------|------|------|
| 165  | -865 | -865 | -865 |
| -865 | -865 | 245  | -865 |
| -34  | -865 | 45   | 65   |
| -865 | -865 | -865 | 165  |
| -34  | -865 | 45   | 65   |
| 138  | -199 | -199 | -199 |
| -865 | 45   | 204  | -865 |
| -34  | 45   | -865 | 65   |
| 165  | -865 | -865 | -865 |
| 124  | 45   | -865 | -865 |
| 65   | -865 | 45   | -34  |
| 65   | -865 | 145  | -865 |
| -865 | 204  | 45   | -865 |
| -865 | 245  | -865 | -865 |
| 165  | -865 | -865 | -865 |

ALPHABET= ACGT

>srsc7\_006. 9

log-odds matrix: alength= 4 w= 10 n= 1637 bayes= 8. 67331 E= 6. 4e+005

|      |      |      |      |
|------|------|------|------|
| -865 | 245  | -865 | -865 |
| 65   | -865 | -865 | 65   |
| -865 | -865 | -865 | 165  |
| -865 | 204  | 45   | -865 |
| 165  | -865 | -865 | -865 |
| -865 | 45   | -865 | 124  |
| -865 | -865 | -865 | 165  |
| -34  | -865 | -865 | 124  |
| -865 | -865 | -865 | 165  |
| -865 | -865 | -865 | 165  |

ALPHABET= ACGT

>srsc7\_007. 1

log-odds matrix: alength= 4 w= 12 n= 564 bayes= 8. 13443 E= 1. 7e+004

|      |      |      |      |
|------|------|------|------|
| 182  | -765 | -765 | -765 |
| -765 | -765 | 220  | -765 |
| 82   | -765 | 120  | -765 |
| 182  | -765 | -765 | -765 |
| 82   | -765 | 120  | -765 |
| 182  | -765 | -765 | -765 |
| 182  | -765 | -765 | -765 |
| -765 | -765 | -765 | 182  |
| -765 | -765 | 220  | -765 |
| 182  | -765 | -765 | -765 |
| -765 | -765 | 220  | -765 |
| -765 | -765 | 220  | -765 |

ALPHABET= ACGT

&gt;srsc7\_007. 2

log-odds matrix: alength= 4 w= 11 n= 566 bayes= 8. 13955 E= 3. 5e+004

|      |      |      |      |
|------|------|------|------|
| -765 | -765 | 220  | -765 |
| -765 | -765 | -765 | 182  |
| -99  | -99  | -99  | 118  |
| 82   | 120  | -765 | -765 |
| -765 | -765 | 220  | -765 |
| -765 | 120  | 120  | -765 |
| -765 | -765 | -765 | 182  |
| 182  | -765 | -765 | -765 |
| -765 | -765 | 220  | -765 |
| 182  | -765 | -765 | -765 |
| 182  | -765 | -765 | -765 |

ALPHABET= ACGT

&gt;srsc7\_008. 10

log-odds matrix: alength= 4 w= 13 n= 1795 bayes= 8. 80655 E= 3. 1e+006

|      |      |      |      |
|------|------|------|------|
| 174  | -865 | -865 | -865 |
| 174  | -865 | -865 | -865 |
| 74   | -865 | 131  | -865 |
| -865 | 31   | 190  | -865 |
| 12   | -199 | -199 | 94   |
| -865 | -865 | -865 | 174  |
| 133  | -865 | -865 | -26  |
| -26  | -865 | -865 | 133  |
| 74   | -865 | 131  | -865 |
| 74   | -865 | 131  | -865 |
| -865 | -865 | -865 | 174  |
| -865 | -865 | 231  | -865 |
| 174  | -865 | -865 | -865 |

ALPHABET= ACGT

&gt;srsc7\_008. 1

log-odds matrix: alength= 4 w= 25 n= 1747 bayes= 8. 76736 E= 4. 9e+000

|      |      |      |      |
|------|------|------|------|
| -865 | 31   | -865 | 133  |
| -865 | 190  | -865 | -26  |
| 133  | 31   | -865 | -865 |
| -865 | 231  | -865 | -865 |
| 133  | -865 | -865 | -26  |
| 74   | -865 | 131  | -865 |
| 174  | -865 | -865 | -865 |
| 174  | -865 | -865 | -865 |
| -26  | 190  | -865 | -865 |
| -865 | 231  | -865 | -865 |
| -865 | 131  | -865 | 74   |
| 174  | -865 | -865 | -865 |
| 133  | -865 | -865 | -26  |
| -865 | 131  | -865 | 74   |
| -865 | 231  | -865 | -865 |
| 133  | 31   | -865 | -865 |
| -865 | 31   | -865 | 133  |
| 74   | -865 | 131  | -865 |
| 133  | -865 | 31   | -865 |
| 133  | 31   | -865 | -865 |
| -865 | -865 | 231  | -865 |
| -865 | -865 | 231  | -865 |
| 146  | -199 | -199 | -199 |
| -865 | 31   | 190  | -865 |



-865 231 -865

ALPHABET= ACGT

&gt;srsc7\_008. 2

log-odds matrix: alength= 4 w= 15 n= 1787 bayes= 8. 80009 E= 2. 8e+004

|      |      |      |      |
|------|------|------|------|
| 174  | -865 | -865 | -865 |
| -865 | 231  | -865 | -865 |
| -865 | -865 | -865 | 174  |
| -26  | -865 | -865 | 133  |
| -865 | 231  | -865 | -865 |
| -865 | 231  | -865 | -865 |
| 74   | -865 | -865 | 74   |
| 133  | -865 | -865 | -26  |
| 74   | 31   | 31   | -865 |
| 12   | 58   | -199 | 12   |
| 174  | -865 | -865 | -865 |
| 174  | -865 | -865 | -865 |
| 174  | -865 | -865 | -865 |
| -26  | 131  | 31   | -865 |
| 174  | -865 | -865 | -865 |

ALPHABET= ACGT

&gt;srsc7\_008. 3

log-odds matrix: alength= 4 w= 15 n= 1787 bayes= 8. 80009 E= 6. 2e+004

|      |      |      |      |
|------|------|------|------|
| -865 | -865 | -865 | 174  |
| -865 | 31   | 31   | 74   |
| 174  | -865 | -865 | -865 |
| -865 | -865 | 231  | -865 |
| 74   | -865 | -865 | 74   |
| 74   | 31   | 31   | -865 |
| -865 | 190  | -865 | -26  |
| -865 | 190  | -865 | -26  |
| -865 | -865 | -865 | 174  |
| -865 | -865 | -865 | 174  |
| -865 | -865 | 231  | -865 |
| 74   | 131  | -865 | -865 |
| 133  | 31   | -865 | -865 |
| 174  | -865 | -865 | -865 |
| -26  | 190  | -865 | -865 |

ALPHABET= ACGT

&gt;srsc7\_008. 6

log-odds matrix: alength= 4 w= 15 n= 1787 bayes= 8. 80009 E= 1. 1e+006

|      |      |      |      |
|------|------|------|------|
| -865 | -865 | -865 | 174  |
| -865 | -865 | -865 | 174  |
| -26  | 31   | 31   | -26  |
| -865 | -865 | -865 | 174  |
| -865 | 231  | -865 | -865 |
| -865 | -865 | -865 | 174  |
| -865 | -865 | 231  | -865 |
| 74   | -865 | -865 | 74   |
| -26  | -865 | 131  | -26  |
| -26  | -865 | -865 | 133  |
| -865 | 131  | -865 | 74   |
| -865 | -865 | 31   | 133  |
| 133  | -865 | 31   | -865 |
| -865 | 31   | 190  | -865 |
| -865 | -865 | 31   | 133  |

ALPHABET= ACGT

&gt;srsc7\_008. 7

log-odds matrix: alength= 4 w= 12 n= 1799 bayes= 8. 80977 E= 1. 1e+006

|      |      |      |      |
|------|------|------|------|
| 174  | -865 | -865 | -865 |
| -865 | -865 | 190  | -26  |
| -865 | 190  | -865 | -26  |
| -865 | 231  | -865 | -865 |
| -26  | -865 | 31   | 74   |
| -26  | 31   | -865 | 74   |
| -865 | 190  | 31   | -865 |
| 133  | -865 | 31   | -865 |
| 174  | -865 | -865 | -865 |
| -865 | -865 | 31   | 133  |
| -865 | -865 | 231  | -865 |
| -865 | 31   | 190  | -865 |

ALPHABET= ACGT

&gt;srsc7\_008. 8

log-odds matrix: alength= 4 w= 11 n= 1803 bayes= 8. 81298 E= 2. 1e+006

|      |      |      |      |
|------|------|------|------|
| 174  | -865 | -865 | -865 |
| 94   | 58   | -199 | -199 |
| 174  | -865 | -865 | -865 |
| 74   | -865 | 131  | -865 |
| -865 | 231  | -865 | -865 |
| 174  | -865 | -865 | -865 |
| -865 | 231  | -865 | -865 |
| 133  | -865 | -865 | -26  |
| 74   | -865 | 131  | -865 |
| -865 | -865 | 190  | -26  |
| -865 | -865 | 190  | -26  |

ALPHABET= ACGT

&gt;srsc7\_008. 9

log-odds matrix: alength= 4 w= 15 n= 1787 bayes= 8. 80009 E= 3. 5e+006

|      |      |      |      |
|------|------|------|------|
| -865 | -865 | -865 | 174  |
| -865 | 131  | 131  | -865 |
| 174  | -865 | -865 | -865 |
| -865 | 190  | -865 | -26  |
| 174  | -865 | -865 | -865 |
| -865 | 190  | -865 | -26  |
| 133  | 31   | -865 | -865 |
| 174  | -865 | -865 | -865 |
| -26  | 31   | -865 | 74   |
| 133  | -865 | 31   | -865 |
| -865 | 31   | 190  | -865 |
| 74   | 31   | -865 | -26  |
| -865 | -865 | 31   | 133  |
| 133  | 31   | -865 | -865 |
| 174  | -865 | -865 | -865 |

ALPHABET= ACGT

&gt;srsc7\_009. 1

log-odds matrix: alength= 4 w= 37 n= 1357 bayes= 8. 40195 E= 6. 2e+002

|      |      |      |      |
|------|------|------|------|
| -865 | 189  | -865 | -25  |
| 74   | -865 | 131  | -865 |
| 133  | -865 | -865 | -25  |
| 133  | -865 | 31   | -865 |
| 174  | -865 | -865 | -865 |
| -865 | 31   | -865 | 133  |
| 133  | -865 | 31   | -865 |

74203Suppl emental \_CNSmatri ces. pssm. txt

```

-25 -865 131 -25
-25 -865 189 -865
-865 -865 31 133
-199 145 57 -199
133 -865 -865 -25
74 -865 131 -865
133 -865 -865 -25
-865 31 189 -865
-865 231 -865 -865
174 -865 -865 -865
133 31 -865 -865
174 -865 -865 -865
-865 131 131 -865
-25 31 131 -865
-865 189 -865 -25
133 -865 31 -865
-865 31 189 -865
-865 -865 -865 174
-25 -865 189 -865
174 -865 -865 -865
-865 31 -865 133
133 -865 31 -865
74 131 -865 -865
133 -865 31 -865
133 -865 31 -865
74 -865 31 -25
-865 -865 189 -25
133 -865 31 -865
74 -865 131 -865
174 -865 -865 -865

```

ALPHABET= ACGT

>srsc7\_009. 2

log-odds matrix: alength= 4 w= 14 n= 1449 bayes= 8.49685 E= 5.2e+004

```

-865 31 189 -865
-865 -865 -865 174
-865 -865 -865 174
-865 -865 -865 174
174 -865 -865 -865
-865 189 -865 -25
-865 189 -865 -25
74 131 -865 -865
133 -865 -865 -25
133 -865 -865 -25
-865 -865 231 -865
-865 31 -865 133
-865 131 -865 74
174 -865 -865 -865

```

ALPHABET= ACGT

>srsc7\_009. 3

log-odds matrix: alength= 4 w= 11 n= 1461 bayes= 8.50879 E= 7.3e+004

```

-865 231 -865 -865
174 -865 -865 -865
133 -865 31 -865
133 31 -865 -865
74 -865 31 -25
174 -865 -865 -865
174 -865 -865 -865
133 -865 -865 -25
-865 231 -865 -865

```

|      |      |      |      |
|------|------|------|------|
| 133  | -865 | 31   | -865 |
| -865 | 231  | -865 | -865 |

ALPHABET= ACGT

&gt;srsc7\_009. 4

log-odds matrix: alength= 4 w= 11 n= 1461 bayes= 8. 50879 E= 5. 6e+005

|      |      |      |      |
|------|------|------|------|
| -865 | -865 | -865 | 174  |
| -865 | -865 | -865 | 174  |
| -25  | -865 | 189  | -865 |
| -865 | -865 | 231  | -865 |
| -865 | 31   | -865 | 133  |
| -865 | 31   | -865 | 133  |
| 12   | -199 | -199 | 94   |
| -865 | -865 | 231  | -865 |
| -865 | 189  | 31   | -865 |
| 74   | -865 | -865 | 74   |
| -25  | -865 | 189  | -865 |

ALPHABET= ACGT

&gt;srsc7\_009. 5

log-odds matrix: alength= 4 w= 13 n= 1453 bayes= 8. 50084 E= 5. 9e+010

|      |      |      |      |
|------|------|------|------|
| -199 | -199 | -199 | 146  |
| 146  | -199 | -199 | -199 |
| -199 | -199 | -199 | 146  |
| 146  | -199 | -199 | -199 |
| -199 | 199  | -199 | -199 |
| 146  | -199 | -199 | -199 |
| 12   | -199 | 145  | -199 |
| -199 | 199  | -199 | -199 |
| 146  | -199 | -199 | -199 |
| -199 | 57   | -199 | 94   |
| 94   | -199 | 57   | -199 |
| 146  | -199 | -199 | -199 |
| 146  | -199 | -199 | -199 |

ALPHABET= ACGT

&gt;srsc7\_009. 6

log-odds matrix: alength= 4 w= 10 n= 1465 bayes= 8. 51274 E= 5. 1e+010

|      |      |      |      |
|------|------|------|------|
| -199 | 199  | -199 | -199 |
| 12   | 145  | -199 | -199 |
| -199 | -199 | -199 | 146  |
| -199 | -199 | -199 | 146  |
| -199 | -199 | 199  | -199 |
| 94   | -199 | -199 | 12   |
| 146  | -199 | -199 | -199 |
| 146  | -199 | -199 | -199 |
| 94   | -199 | -199 | 12   |
| -199 | -199 | 199  | -199 |

ALPHABET= ACGT

&gt;srsc7\_009. 8

log-odds matrix: alength= 4 w= 10 n= 1465 bayes= 8. 51274 E= 1. 7e+011

|      |      |      |      |
|------|------|------|------|
| -199 | 199  | -199 | -199 |
| 146  | -199 | -199 | -199 |
| -199 | 57   | 145  | -199 |
| -199 | 145  | -199 | 12   |
| -100 | 80   | -100 | 42   |
| -100 | -100 | 157  | -100 |
| -100 | -100 | 80   | 42   |

74203Suppl emental \_CNSmatri ces. pssm. txt

|     |      |      |      |
|-----|------|------|------|
| 42  | -100 | -100 | 42   |
| 112 | -100 | -100 | -100 |
| 112 | -100 | -100 | -100 |

ALPHABET= ACGT

>srsc7\_016.1

log-odds matrix: alength= 4 w= 41 n= 753 bayes= 8.55267 E= 1.5e+002

|      |      |      |      |
|------|------|------|------|
| -765 | -765 | -765 | 163  |
| -765 | -765 | 248  | -765 |
| -765 | -765 | -765 | 163  |
| 163  | -765 | -765 | -765 |
| -765 | 248  | -765 | -765 |
| 163  | -765 | -765 | -765 |
| -765 | 248  | -765 | -765 |
| 64   | -765 | -765 | 64   |
| -765 | -765 | -765 | 163  |
| 64   | -765 | 148  | -765 |
| -765 | 248  | -765 | -765 |
| 163  | -765 | -765 | -765 |
| -765 | 148  | -765 | 64   |
| -765 | -765 | 248  | -765 |
| 163  | -765 | -765 | -765 |
| -765 | 248  | -765 | -765 |
| 163  | -765 | -765 | -765 |
| -765 | -765 | -765 | 163  |
| -765 | -765 | -765 | -765 |
| -765 | -765 | -765 | 163  |
| -765 | -765 | 248  | -765 |
| 163  | -765 | -765 | -765 |
| -765 | 248  | -765 | -765 |
| -765 | -765 | -765 | 163  |
| 163  | -765 | -765 | -765 |
| -765 | -765 | -765 | 163  |
| -765 | -765 | -765 | 163  |
| -765 | -765 | 248  | -765 |
| 64   | -765 | 148  | -765 |
| -765 | -765 | -765 | 163  |
| -765 | -765 | -765 | 163  |
| -765 | -765 | 248  | -765 |
| -765 | 248  | -765 | -765 |
| -765 | 248  | -765 | -765 |
| 163  | -765 | -765 | -765 |
| 64   | 148  | -765 | -765 |
| 163  | -765 | -765 | -765 |
| -765 | 248  | -765 | -765 |
| 163  | -765 | -765 | -765 |
| 163  | -765 | -765 | -765 |
| 163  | -765 | -765 | -765 |
| 163  | -765 | -765 | -765 |
| 163  | -765 | -765 | -765 |

ALPHABET= ACGT

>srsc7\_016.2

log-odds matrix: alength= 4 w= 13 n= 809 bayes= 8.65642 E= 3.0e+003

|      |      |      |      |
|------|------|------|------|
| -765 | 248  | -765 | -765 |
| -765 | 248  | -765 | -765 |
| 163  | -765 | -765 | -765 |
| 163  | -765 | -765 | -765 |
| 163  | -765 | -765 | -765 |
| 163  | -765 | -765 | -765 |
| -765 | -765 | 248  | -765 |
| -765 | -765 | 248  | -765 |
| 163  | -765 | -765 | -765 |

74203Suppl emental \_CNSmatri ces. pssm. txt

|      |      |      |      |
|------|------|------|------|
| 163  | -765 | -765 | -765 |
| 163  | -765 | -765 | -765 |
| -765 | -765 | -765 | 163  |
| -765 | -765 | 248  | -765 |

ALPHABET= ACGT

>srsc7\_016. 6

log-odds matri x: alength= 4 w= 12 n= 811 bayes= 8. 66 E= 2. 2e+004

|      |      |      |      |
|------|------|------|------|
| -765 | -765 | 248  | -765 |
| -765 | 248  | -765 | -765 |
| 163  | -765 | -765 | -765 |
| -765 | -765 | -765 | 163  |
| -765 | 148  | -765 | 64   |
| 163  | -765 | -765 | -765 |
| -765 | -765 | -765 | 163  |
| -765 | -765 | -765 | 163  |
| -765 | -765 | -765 | 163  |
| -765 | 248  | -765 | -765 |
| -765 | -765 | -765 | 163  |
| -765 | -765 | -765 | 163  |

ALPHABET= ACGT

>srsc7\_016. 7

log-odds matri x: alength= 4 w= 11 n= 813 bayes= 8. 66356 E= 2. 3e+004

|      |      |      |      |
|------|------|------|------|
| -765 | 248  | -765 | -765 |
| 163  | -765 | -765 | -765 |
| 163  | -765 | -765 | -765 |
| 64   | -765 | 148  | -765 |
| 163  | -765 | -765 | -765 |
| -765 | -765 | 248  | -765 |
| 163  | -765 | -765 | -765 |
| 163  | -765 | -765 | -765 |
| -765 | -765 | 248  | -765 |
| 163  | -765 | -765 | -765 |
| 163  | -765 | -765 | -765 |

ALPHABET= ACGT

>srsc7\_016. 8

log-odds matri x: alength= 4 w= 11 n= 813 bayes= 8. 66356 E= 2. 4e+004

|      |      |      |      |
|------|------|------|------|
| -765 | 248  | -765 | -765 |
| 163  | -765 | -765 | -765 |
| 64   | -765 | 148  | -765 |
| -765 | 148  | 148  | -765 |
| -765 | -765 | -765 | 163  |
| 64   | -765 | -765 | 64   |
| 163  | -765 | -765 | -765 |
| -765 | -765 | 248  | -765 |
| -765 | 248  | -765 | -765 |
| 163  | -765 | -765 | -765 |
| -765 | -765 | 248  | -765 |

ALPHABET= ACGT

>srsc7\_022. 1

log-odds matri x: alength= 4 w= 15 n= 128 bayes= 5. 97728 E= 1. 3e+003

|      |      |      |      |
|------|------|------|------|
| -765 | -765 | -765 | 189  |
| -765 | -765 | 211  | -765 |
| -765 | -765 | 211  | -765 |
| -765 | 211  | -765 | -765 |
| 89   | 111  | -765 | -765 |

74203Suppl emental \_CNSmatri ces. pssm. txt

```
-765 -765 111 89
89 -765 -765 89
-765 -765 211 -765
-765 -765 -765 189
-765 111 111 -765
189 -765 -765 -765
-765 -765 111 89
-765 -765 -765 189
-765 -765 211 -765
-765 211 -765 -765
```

ALPHABET= ACGT

>srsc7\_022. 2

log-odds matrix: alength= 4 w= 18 n= 122 bayes= 5.90689 E= 2.0e+003

```
-765 -765 211 -765
89 -765 111 -765
189 -765 -765 -765
189 -765 -765 -765
-765 -765 211 -765
89 -765 111 -765
-765 -765 211 -765
89 -765 111 -765
189 -765 -765 -765
-765 -765 111 89
-765 111 -765 89
89 -765 111 -765
-765 111 111 -765
-765 -765 -765 189
-765 -765 211 -765
-765 -765 211 -765
-765 -765 211 -765
189 -765 -765 -765
```

ALPHABET= ACGT

>srsc7\_022. 3

log-odds matrix: alength= 4 w= 10 n= 138 bayes= 6.08746 E= 3.2e+003

```
189 -765 -765 -765
189 -765 -765 -765
89 111 -765 -765
89 111 -765 -765
-765 211 -765 -765
189 -765 -765 -765
-765 -765 211 -765
89 -765 111 -765
189 -765 -765 -765
-765 -765 211 -765
```

ALPHABET= ACGT

>srsc7\_024. 1

log-odds matrix: alength= 4 w= 30 n= 901 bayes= 8.81218 E= 1.4e+003

```
-765 -765 -765 179
-765 -765 223 -765
-765 -765 -765 179
-765 -765 123 79
-765 -765 223 -765
179 -765 -765 -765
-765 -765 -765 179
-765 -765 -765 179
-765 223 -765 -765
-765 123 123 -765
```

74203Suppl emental \_CNSmatri ces. pssm. txt

```

179 -765 -765 -765
-765 -765 -765 179
-765 -765 223 -765
-765 223 -765 -765
-765 -765 -765 179
-765 -765 -765 179
-765 -765 -765 179
-765 -765 -765 179
-765 223 -765 -765
179 -765 -765 -765
-765 223 -765 -765
-765 -765 -765 179
-765 123 -765 79
-765 123 -765 79
-765 223 -765 -765
179 -765 -765 -765
-765 223 -765 -765
-765 223 -765 -765
-765 -765 -765 179
-765 -765 223 -765

```

ALPHABET= ACGT

>srsc7\_024. 2

log-odds matrix: alength= 4 w= 14 n= 933 bayes= 8.86264 E= 8.0e+003

```

-765 223 -765 -765
179 -765 -765 -765
179 -765 -765 -765
-765 -765 -765 179
-765 223 -765 -765
179 -765 -765 -765
-765 -765 223 -765
-765 223 -765 -765
-765 -765 -765 179
-765 -765 223 -765
179 -765 -765 -765
-765 -765 -765 179
-765 -765 -765 179
179 -765 -765 -765

```

ALPHABET= ACGT

>srsc7\_024. 6

log-odds matrix: alength= 4 w= 11 n= 939 bayes= 8.87191 E= 1.2e+005

```

179 -765 -765 -765
-765 -765 -765 179
179 -765 -765 -765
-765 123 123 -765
-765 -765 -765 179
179 -765 -765 -765
-765 -765 -765 179
-765 -765 -765 179
-765 -765 -765 179
-765 -765 -765 179
-765 -765 -765 179

```

ALPHABET= ACGT

>srsc7\_024. 7

log-odds matrix: alength= 4 w= 10 n= 941 bayes= 8.87498 E= 1.2e+005

```

-765 -765 -765 179
-765 -765 -765 179
-765 -765 -765 179

```



74203Suppl emental \_CNSmatri ces. pssm. txt

|      |      |      |      |
|------|------|------|------|
| 179  | -765 | -765 | -765 |
| -765 | -765 | -765 | 179  |
| 179  | -765 | -765 | -765 |
| -765 | -765 | -765 | 179  |
| 79   | -765 | 123  | -765 |
| -765 | -765 | 223  | -765 |
| 179  | -765 | -765 | -765 |

ALPHABET= ACGT

>srsc8\_002. 1

log-odds matrix: a length= 4 w= 40 n= 1381 bayes= 8. 8434 E= 8. 1e+003

|      |      |      |      |
|------|------|------|------|
| -823 | -823 | 232  | -823 |
| 15   | -823 | 174  | -823 |
| -823 | -823 | 174  | 15   |
| 15   | -823 | 174  | -823 |
| 15   | -823 | 174  | -823 |
| -823 | 74   | 174  | -823 |
| 173  | -823 | -823 | -823 |
| 115  | -823 | 74   | -823 |
| 15   | -823 | -823 | 115  |
| -823 | -823 | 232  | -823 |
| 173  | -823 | -823 | -823 |
| 173  | -823 | -823 | -823 |
| 115  | -823 | 74   | -823 |
| 173  | -823 | -823 | -823 |
| -823 | 232  | -823 | -823 |
| 115  | 74   | -823 | -823 |
| 115  | -823 | 74   | -823 |
| 115  | -823 | -823 | 15   |
| 115  | -823 | -823 | 15   |
| -823 | -823 | -823 | 173  |
| -823 | 232  | -823 | -823 |
| -823 | -823 | -823 | 173  |
| -823 | -823 | -823 | 173  |
| 15   | -823 | 174  | -823 |
| 15   | -823 | 174  | -823 |
| 173  | -823 | -823 | -823 |
| -823 | 74   | -823 | 115  |
| -823 | -823 | -823 | 173  |
| 15   | -823 | 174  | -823 |
| -823 | -823 | 74   | 115  |
| -823 | -823 | 174  | 15   |
| 115  | -823 | 74   | -823 |
| 173  | -823 | -823 | -823 |
| -823 | 174  | -823 | 15   |
| 15   | -823 | -823 | 115  |
| 15   | -823 | -823 | 115  |
| -823 | -823 | 174  | 15   |
| -823 | -823 | 174  | 15   |
| -823 | 74   | 174  | -823 |
| 173  | -823 | -823 | -823 |

ALPHABET= ACGT

>srsc8\_002. 2

log-odds matrix: a length= 4 w= 12 n= 1465 bayes= 8. 92877 E= 1. 1e+004

|      |      |      |      |
|------|------|------|------|
| 173  | -823 | -823 | -823 |
| 173  | -823 | -823 | -823 |
| -823 | -823 | 232  | -823 |
| 173  | -823 | -823 | -823 |
| 173  | -823 | -823 | -823 |
| -823 | 232  | -823 | -823 |

74203Suppl emental \_CNSmatri ces. pssm. txt

|      |      |      |      |
|------|------|------|------|
| 115  | -823 | 74   | -823 |
| 173  | -823 | -823 | -823 |
| 173  | -823 | -823 | -823 |
| -823 | 174  | 74   | -823 |
| 173  | -823 | -823 | -823 |
| 173  | -823 | -823 | -823 |

ALPHABET= ACGT

>srsc8\_002. 3

log-odds matri x: alength= 4 w= 11 n= 1468 bayes= 8. 93172 E= 5. 4e+004

|      |      |      |      |
|------|------|------|------|
| 173  | -823 | -823 | -823 |
| -823 | 232  | -823 | -823 |
| 115  | -823 | -823 | 15   |
| -823 | -823 | 232  | -823 |
| 173  | -823 | -823 | -823 |
| 115  | -823 | -823 | 15   |
| -823 | -823 | 232  | -823 |
| 115  | -823 | -823 | 15   |
| -823 | -823 | -823 | 173  |
| -823 | -823 | -823 | 173  |
| -823 | -823 | 232  | -823 |

ALPHABET= ACGT

>srsc8\_002. 4

log-odds matri x: alength= 4 w= 12 n= 1465 bayes= 8. 92877 E= 5. 6e+004

|      |      |      |      |
|------|------|------|------|
| -823 | -823 | -823 | 173  |
| -823 | -823 | -823 | 173  |
| -823 | -823 | -823 | 173  |
| 15   | 74   | -823 | 15   |
| 115  | -823 | -823 | 15   |
| -823 | -823 | -823 | 173  |
| -823 | -823 | -823 | 173  |
| -823 | -823 | -823 | 173  |
| -823 | -823 | -823 | 173  |
| -823 | 232  | -823 | -823 |
| 173  | -823 | -823 | -823 |
| -823 | 232  | -823 | -823 |

ALPHABET= ACGT

>srsc8\_002. 5

log-odds matri x: alength= 4 w= 13 n= 1462 bayes= 8. 9258 E= 7. 4e+004

|      |      |      |      |
|------|------|------|------|
| -823 | -823 | -823 | 173  |
| -823 | 74   | 174  | -823 |
| -823 | -823 | -823 | 173  |
| 15   | -823 | 174  | -823 |
| 115  | -823 | 74   | -823 |
| -823 | -823 | 232  | -823 |
| 173  | -823 | -823 | -823 |
| -823 | 174  | 74   | -823 |
| 173  | -823 | -823 | -823 |
| -823 | -823 | -823 | 173  |
| 15   | -823 | -823 | 115  |
| 173  | -823 | -823 | -823 |
| -823 | 232  | -823 | -823 |

ALPHABET= ACGT

>srsc8\_002. 6

log-odds matri x: alength= 4 w= 10 n= 1471 bayes= 8. 93467 E= 5. 3e+004

|      |     |      |      |
|------|-----|------|------|
| -823 | 232 | -823 | -823 |
|------|-----|------|------|

74203Suppl emental \_CNSmatri ces. pssm. txt

```
-823 -823 -823 173
-823 -823 232 -823
173 -823 -823 -823
173 -823 -823 -823
173 -823 -823 -823
-823 174 -823 15
-823 -823 -823 173
15 -823 174 -823
173 -823 -823 -823
```

ALPHABET= ACGT

>srsc8\_002. 7

log-odds matrix: alength= 4 w= 11 n= 1468 bayes= 8.93172 E= 3.5e+005

```
-823 -823 -823 173
-823 -823 74 115
173 -823 -823 -823
-823 -823 232 -823
-158 187 -158 -158
173 -823 -823 -823
173 -823 -823 -823
15 74 -823 15
-823 -823 -823 173
-823 -823 -823 173
-823 232 -823 -823
```

ALPHABET= ACGT

>srsc8\_002. 8

log-odds matrix: alength= 4 w= 15 n= 1456 bayes= 8.91986 E= 6.8e+005

```
-823 -823 -823 173
-823 -823 74 115
-823 -823 232 -823
15 174 -823 -823
-823 74 -823 115
15 174 -823 -823
-823 -823 -823 173
-823 -823 -823 173
15 174 -823 -823
173 -823 -823 -823
15 -823 74 15
-823 232 -823 -823
173 -823 -823 -823
15 -823 -823 115
173 -823 -823 -823
```

ALPHABET= ACGT

>srsc8\_002. 9

log-odds matrix: alength= 4 w= 15 n= 1456 bayes= 8.91986 E= 2.0e+006

```
-823 232 -823 -823
15 -823 -823 115
15 -823 174 -823
15 74 74 -823
173 -823 -823 -823
-823 -823 -823 173
115 -823 -823 15
173 -823 -823 -823
-823 -823 -823 173
15 -823 74 15
15 174 -823 -823
-823 232 -823 -823
173 -823 -823 -823
```

74203Suppl emental \_CNSmatri ces. pssm. txt

```
-823    74   -823    115
-823    74   174   -823
```

ALPHABET= ACGT

>srsc8\_003. 1

log-odds matrix: alength= 4 w= 50 n= 572 bayes= 7. 56732 E= 2. 7e+000

```
-823   -823   -823    159
-823   -823   -823    198
-823    98    198   -823
-823    98   -823    101
-823   -823    256   -823
-823    256   -823   -823
159   -823   -823   -823
101   -823   -823    1
101   -823    98   -823
101   -823   -823    1
101   -823   -823    1
1    -823   -823    101
159   -823   -823   -823
1    -823    98    1
1    -823   -823    101
-823   -823   -823    159
-823   -823    256   -823
1    -823   -823    101
-823   -823   -823    159
159   -823   -823   -823
1    -823    198   -823
-823    98   -823    101
-823   -823   -823    159
-823   -823    198    1
-823   -823   -823    159
101   -823    98   -823
-823   -823   -823    159
-823   -823    256   -823
-823   -823   -823    159
1    -823   -823    101
-823   -823   -823    159
-823   -823    256   -823
-823    98    198   -823
-823   -823   -823    159
-823   -823   -823    159
-823    198   -823    1
-823    98   -823    101
1    -823    198   -823
1    -823   -823    101
-823   -823   -823    159
101   -823   -823    1
-823   -823    256   -823
1    -823   -823    101
-823   -823   -823    159
159   -823   -823   -823
101   -823    98   -823
-823   -823   -823    159
-823   -823   -823    159
-823   -823   -823    159
-823   -823    256   -823
-823   -823   -823    159
```

ALPHABET= ACGT

>srsc8\_003. 2

log-odds matrix: alength= 4 w= 18 n= 668 bayes= 7. 79225 E= 1. 6e+003

```
-823   -823   -823    159
```

74203Suppl emental \_CNSmatri ces. pssm. txt

```

-823 -823 256 -823
159 -823 -823 -823
159 -823 -823 -823
-823 -823 98 101
-823 -823 256 -823
-823 -823 -823 159
1 -823 198 -823
101 -823 98 -823
1 198 -823 -823
101 -823 98 -823
-823 -823 198 1
101 98 -823 -823
-823 256 -823 -823
1 198 -823 -823
-823 256 -823 -823
159 -823 -823 -823
159 -823 -823 -823

```

ALPHABET= ACGT

>srsc8\_003. 3

log-odds matrix: al length= 4 w= 12 n= 686 bayes= 7. 83078 E= 3. 5e+003

```

-823 -823 -823 159
-823 -823 -823 159
-823 -823 -823 159
-823 -823 -823 159
-823 -823 256 -823
1 -823 98 1
-823 256 -823 -823
-823 198 -823 1
159 -823 -823 -823
-823 -823 256 -823
159 -823 -823 -823
-823 -823 -823 159

```

ALPHABET= ACGT

>srsc8\_003. 4

log-odds matrix: al length= 4 w= 16 n= 674 bayes= 7. 80521 E= 9. 5e+003

```

-823 256 -823 -823
1 -823 -823 101
-823 -823 -823 159
-823 -823 198 1
-823 -823 256 -823
-823 98 198 -823
1 -823 198 -823
101 98 -823 -823
159 -823 -823 -823
-823 -823 -823 159
159 -823 -823 -823
159 -823 -823 -823
1 198 -823 -823
1 -823 -823 101
-823 98 198 -823
-823 -823 -823 159

```

ALPHABET= ACGT

>srsc8\_003. 6

log-odds matrix: al length= 4 w= 12 n= 686 bayes= 7. 83078 E= 8. 5e+004

```

-823 -823 198 1
-823 198 98 -823
-823 -823 -823 159

```

74203Suppl emental \_CNSmatri ces. pssm. txt

|      |      |      |      |
|------|------|------|------|
| 1    | 98   | 98   | -823 |
| 1    | 98   | 98   | -823 |
| -823 | -823 | -823 | 159  |
| -823 | -823 | -823 | 159  |
| -158 | 120  | -158 | 42   |
| -823 | -823 | 256  | -823 |
| -823 | -823 | -823 | 159  |
| 159  | -823 | -823 | -823 |
| -823 | 256  | -823 | -823 |

ALPHABET= ACGT

>srsc8\_003.7

log-odds matrix: alength= 4 w= 11 n= 689 bayes= 7.8371 E= 1.5e+006

|      |      |      |      |
|------|------|------|------|
| 159  | -823 | -823 | -823 |
| -823 | 198  | -823 | 1    |
| -823 | -823 | -823 | 159  |
| 101  | -823 | -823 | 1    |
| -823 | -823 | -823 | 159  |
| -823 | -823 | -823 | 159  |
| -823 | -823 | -823 | 159  |
| 159  | -823 | -823 | -823 |
| 1    | 98   | -823 | 1    |
| -823 | -823 | 98   | 101  |
| -823 | 98   | 198  | -823 |

ALPHABET= ACGT

>srsc8\_003.8

log-odds matrix: alength= 4 w= 11 n= 689 bayes= 7.8371 E= 6.9e+007

|      |      |      |      |
|------|------|------|------|
| 123  | -158 | -158 | -158 |
| -158 | 210  | -158 | -158 |
| 123  | -158 | -158 | -158 |
| 42   | -158 | -158 | 42   |
| -158 | 120  | -158 | 42   |
| 42   | -158 | 120  | -158 |
| 101  | 98   | -823 | -823 |
| -823 | -823 | -823 | 159  |
| -823 | 98   | -823 | 101  |
| 1    | 198  | -823 | -823 |
| -823 | 198  | -823 | 1    |

ALPHABET= ACGT

>srsc8\_003.9

log-odds matrix: alength= 4 w= 11 n= 689 bayes= 7.8371 E= 6.6e+007

|      |      |      |      |
|------|------|------|------|
| -158 | -158 | 210  | -158 |
| -158 | -158 | 120  | 42   |
| -158 | -158 | -158 | 123  |
| -158 | -158 | -158 | 123  |
| -158 | 120  | 120  | -158 |
| -823 | -823 | 98   | 101  |
| -823 | 98   | -823 | 101  |
| -823 | 98   | -823 | 101  |
| 101  | 98   | -823 | -823 |
| 1    | -823 | 198  | -823 |
| -823 | -823 | -823 | 159  |

ALPHABET= ACGT

>srsc8\_004.10

log-odds matrix: alength= 4 w= 11 n= 1298 bayes= 8.75377 E= 4.1e+006

|     |      |      |      |
|-----|------|------|------|
| 170 | -823 | -823 | -823 |
|-----|------|------|------|

74203Suppl emental \_CNSmatri ces. pssm. txt

|      |      |      |      |
|------|------|------|------|
| 170  | -823 | -823 | -823 |
| 50   | -158 | 104  | -158 |
| -823 | 237  | -823 | -823 |
| 170  | -823 | -823 | -823 |
| -823 | -823 | -823 | 170  |
| 12   | 79   | 79   | -823 |
| 112  | -823 | -823 | 12   |
| -158 | 104  | 104  | -158 |
| 170  | -823 | -823 | -823 |
| 170  | -823 | -823 | -823 |

ALPHABET= ACGT

>srsc8\_004. 1

log-odds matrix: alength= 4 w= 34 n= 1229 bayes= 8.67478 E= 5.9e+001

|      |      |      |      |
|------|------|------|------|
| 170  | -823 | -823 | -823 |
| -823 | -823 | -823 | 170  |
| -823 | 79   | 178  | -823 |
| -823 | 79   | -823 | 112  |
| -823 | -823 | 79   | 112  |
| -823 | -823 | 237  | -823 |
| 112  | -823 | -823 | 12   |
| 112  | 79   | -823 | -823 |
| 170  | -823 | -823 | -823 |
| 50   | -158 | -158 | 50   |
| -823 | -823 | -823 | 170  |
| -823 | 178  | 79   | -823 |
| 170  | -823 | -823 | -823 |
| -823 | -823 | -823 | 170  |
| -823 | 237  | -823 | -823 |
| 112  | 79   | -823 | -823 |
| 170  | -823 | -823 | -823 |
| 170  | -823 | -823 | -823 |
| 12   | 79   | -823 | 12   |
| 112  | -823 | 79   | -823 |
| -823 | 79   | -823 | 112  |
| 170  | -823 | -823 | -823 |
| 170  | -823 | -823 | -823 |
| -823 | 79   | -823 | 112  |
| 170  | -823 | -823 | -823 |
| -823 | -823 | -823 | 170  |
| 170  | -823 | -823 | -823 |
| -823 | -823 | -823 | 170  |
| -823 | 237  | -823 | -823 |
| 170  | -823 | -823 | -823 |
| 12   | -823 | 79   | 12   |
| -823 | -823 | -823 | 170  |
| -823 | 237  | -823 | -823 |
| -823 | 237  | -823 | -823 |

ALPHABET= ACGT

>srsc8\_004. 2

log-odds matrix: alength= 4 w= 32 n= 1235 bayes= 8.68182 E= 1.2e+003

|      |      |      |      |
|------|------|------|------|
| -823 | 237  | -823 | -823 |
| 112  | 79   | -823 | -823 |
| 12   | -823 | -823 | 112  |
| 12   | -823 | 178  | -823 |
| 170  | -823 | -823 | -823 |
| 112  | 79   | -823 | -823 |
| -823 | -823 | -823 | 170  |
| 170  | -823 | -823 | -823 |
| 12   | -823 | -823 | 112  |

74203Suppl emental \_CNSmatri ces. pssm. txt

```

-823 -823 178 12
-823 178 -823 12
-823 237 -823 -823
-823 237 -823 -823
170 -823 -823 -823
112 -823 79 -823
-823 237 -823 -823
170 -823 -823 -823
12 79 79 -823
170 -823 -823 -823
170 -823 -823 -823
12 -823 178 -823
170 -823 -823 -823
-823 -823 237 -823
12 -823 -823 112
112 -823 79 -823
112 79 -823 -823
112 -823 -823 12
170 -823 -823 -823
-823 79 178 -823
12 178 -823 -823
170 -823 -823 -823
170 -823 -823 -823

```

ALPHABET= ACGT

>srsc8\_004. 3

log-odds matrix: alength= 4 w= 20 n= 1271 bayes= 8. 72338 E= 2. 7e+004

```

-823 -823 -823 170
-823 -823 -823 170
-823 79 -823 112
-823 178 -823 12
112 -823 79 -823
170 -823 -823 -823
-823 -823 237 -823
-823 178 -823 12
-823 79 -823 112
112 -823 79 -823
-823 -823 -823 170
-823 237 -823 -823
-823 79 -823 112
-823 178 -823 12
170 -823 -823 -823
-823 -823 -823 170
-823 -823 237 -823
-823 79 -823 112
170 -823 -823 -823
170 -823 -823 -823

```

ALPHABET= ACGT

>srsc8\_004. 6

log-odds matrix: alength= 4 w= 11 n= 1298 bayes= 8. 75377 E= 1. 3e+005

```

-823 -823 -823 170
-823 -823 237 -823
-823 -823 -823 170
-823 79 -823 112
170 -823 -823 -823
170 -823 -823 -823
12 79 79 -823
-823 -823 -823 170
12 -823 178 -823
-823 -823 -823 170

```



-823 -823 237

-823

ALPHABET= ACGT

>srsc8\_004. 7

log-odds matrix: alength= 4 w= 14 n= 1289 bayes= 8.74371 E= 4.0e+005

|      |      |      |      |
|------|------|------|------|
| -823 | -823 | 237  | -823 |
| -823 | -823 | -823 | 170  |
| -823 | 237  | -823 | -823 |
| 12   | -823 | -823 | 112  |
| -823 | 178  | -823 | 12   |
| -823 | -823 | -823 | 170  |
| -823 | 79   | 178  | -823 |
| -823 | 79   | -823 | 112  |
| 12   | -823 | -823 | 112  |
| 112  | -823 | 79   | -823 |
| -823 | -823 | 237  | -823 |
| 12   | 79   | -823 | 12   |
| 170  | -823 | -823 | -823 |
| -823 | -823 | -823 | 170  |

ALPHABET= ACGT

>srsc8\_004. 9

log-odds matrix: alength= 4 w= 11 n= 1298 bayes= 8.75377 E= 2.7e+006

|      |      |      |      |
|------|------|------|------|
| 170  | -823 | -823 | -823 |
| -823 | -823 | 79   | 112  |
| 170  | -823 | -823 | -823 |
| -823 | 178  | -823 | 12   |
| -823 | -823 | -823 | 170  |
| 12   | 79   | -823 | 12   |
| 170  | -823 | -823 | -823 |
| 170  | -823 | -823 | -823 |
| -823 | -823 | 178  | 12   |
| -823 | 79   | -823 | 112  |
| -823 | -823 | 237  | -823 |

ALPHABET= ACGT

>srsc8\_005. 2

log-odds matrix: alength= 4 w= 11 n= 1028 bayes= 9.00282 E= 4.8e+004

|      |      |      |      |
|------|------|------|------|
| -765 | -765 | -765 | 181  |
| -765 | -765 | 221  | -765 |
| -765 | -765 | -765 | 181  |
| -765 | 121  | 121  | -765 |
| -765 | 221  | -765 | -765 |
| 181  | -765 | -765 | -765 |
| 81   | -765 | -765 | 81   |
| -765 | 221  | -765 | -765 |
| 81   | 121  | -765 | -765 |
| -765 | -765 | 221  | -765 |
| -765 | -765 | 221  | -765 |

ALPHABET= ACGT

>srsc8\_005. 3

log-odds matrix: alength= 4 w= 11 n= 1028 bayes= 9.00282 E= 5.6e+004

|      |      |      |      |
|------|------|------|------|
| -765 | -765 | 221  | -765 |
| -765 | -765 | 221  | -765 |
| -765 | -765 | -765 | 181  |
| -765 | -765 | -765 | 181  |
| 81   | 121  | -765 | -765 |
| 181  | -765 | -765 | -765 |

74203Supplemental\_CNSmatrices.pssm.txt

|      |      |      |      |
|------|------|------|------|
| 181  | -765 | -765 | -765 |
| -765 | -765 | -765 | 181  |
| -765 | -765 | 221  | -765 |
| 181  | -765 | -765 | -765 |
| -765 | -765 | -765 | 181  |

ALPHABET= ACGT

>srsc8\_005.4

log-odds matrix: alength= 4 w= 20 n= 1010 bayes= 8.97728 E= 6.0e+004

|      |      |      |      |
|------|------|------|------|
| -765 | -765 | -765 | 181  |
| -765 | -765 | 221  | -765 |
| -765 | -765 | 221  | -765 |
| -765 | -765 | -765 | 181  |
| 181  | -765 | -765 | -765 |
| 181  | -765 | -765 | -765 |
| -765 | 121  | -765 | 81   |
| 181  | -765 | -765 | -765 |
| 81   | -765 | 121  | -765 |
| -765 | 121  | 121  | -765 |
| -765 | -765 | -765 | 181  |
| -765 | -765 | -765 | 181  |
| -765 | -765 | 221  | -765 |
| -765 | -765 | -765 | 181  |
| -765 | -765 | -765 | 181  |
| -765 | -765 | -765 | 181  |
| 181  | -765 | -765 | -765 |
| -765 | -765 | 121  | 81   |
| -765 | -765 | 221  | -765 |

ALPHABET= ACGT

>srsc8\_005.5

log-odds matrix: alength= 4 w= 11 n= 1028 bayes= 9.00282 E= 8.4e+004

|      |      |      |      |
|------|------|------|------|
| 181  | -765 | -765 | -765 |
| -765 | 221  | -765 | -765 |
| 81   | -765 | -765 | 81   |
| -765 | 221  | -765 | -765 |
| 181  | -765 | -765 | -765 |
| -765 | -765 | 221  | -765 |
| 117  | -99  | -99  | -99  |
| -765 | 221  | -765 | -765 |
| 81   | -765 | -765 | 81   |
| -765 | -765 | -765 | 181  |
| -765 | -765 | 221  | -765 |

ALPHABET= ACGT

>srsc8\_005.6

log-odds matrix: alength= 4 w= 10 n= 1030 bayes= 9.00562 E= 6.5e+004

|      |      |      |      |
|------|------|------|------|
| -765 | -765 | 221  | -765 |
| 81   | -765 | 121  | -765 |
| -765 | 221  | -765 | -765 |
| -765 | -765 | -765 | 181  |
| -765 | -765 | -765 | 181  |
| 181  | -765 | -765 | -765 |
| -765 | -765 | 221  | -765 |
| -765 | -765 | 121  | 81   |
| -765 | -765 | -765 | 181  |
| -765 | -765 | 221  | -765 |

ALPHABET= ACGT

&gt;srsc8\_005. 7

log-odds matrix: alength= 4 w= 11 n= 1028 bayes= 9.00282 E= 1.3e+005

|      |      |      |      |
|------|------|------|------|
| 181  | -765 | -765 | -765 |
| -765 | -765 | 221  | -765 |
| -765 | -765 | 221  | -765 |
| -765 | -765 | 221  | -765 |
| 81   | -765 | -765 | 81   |
| -765 | -765 | -765 | 181  |
| 81   | -765 | -765 | 81   |
| -765 | 121  | 121  | -765 |
| -765 | -765 | -765 | 181  |
| -765 | -765 | -765 | 181  |
| -765 | -765 | -765 | 181  |

ALPHABET= ACGT

&gt;srsc8\_005. 8

log-odds matrix: alength= 4 w= 16 n= 1018 bayes= 8.98868 E= 1.4e+005

|      |      |      |      |
|------|------|------|------|
| -765 | -765 | 221  | -765 |
| -765 | 221  | -765 | -765 |
| -765 | -765 | -765 | 181  |
| -765 | -765 | 221  | -765 |
| 81   | 121  | -765 | -765 |
| 81   | -765 | -765 | 81   |
| -765 | -765 | 121  | 81   |
| -765 | -765 | -765 | 181  |
| 81   | -765 | 121  | -765 |
| 81   | 121  | -765 | -765 |
| -765 | 221  | -765 | -765 |
| 181  | -765 | -765 | -765 |
| 117  | -99  | -99  | -99  |
| -765 | -765 | 221  | -765 |
| -765 | -765 | 221  | -765 |
| -765 | -765 | -765 | 181  |

ALPHABET= ACGT

&gt;srsc8\_006. 1

log-odds matrix: alength= 4 w= 10 n= 1334 bayes= 8.79333 E= 8.6e+005

|      |      |      |      |
|------|------|------|------|
| 175  | -823 | -823 | -823 |
| -158 | -158 | -158 | 137  |
| 175  | -823 | -823 | -823 |
| -158 | -158 | -158 | 137  |
| 175  | -823 | -823 | -823 |
| 55   | -158 | -158 | 55   |
| -823 | 229  | -823 | -823 |
| 175  | -823 | -823 | -823 |
| -823 | -823 | -823 | 175  |
| -823 | -823 | 229  | -823 |

ALPHABET= ACGT

&gt;srsc8\_006. 3

log-odds matrix: alength= 4 w= 11 n= 1331 bayes= 8.79008 E= 4.2e+006

|      |      |      |      |
|------|------|------|------|
| -823 | -823 | 229  | -823 |
| -823 | -823 | -823 | 175  |
| -158 | -158 | -158 | 137  |
| -158 | -158 | -158 | 137  |
| -158 | -158 | -158 | 137  |
| -823 | -823 | 70   | 117  |
| -823 | 229  | -823 | -823 |
| 137  | -158 | -158 | -158 |

74203Suppl emental \_CNSmatri ces. pssm. txt

```
-823 -823 -823 175
-823 -823 -823 175
-823 -823 -823 175
```

ALPHABET= ACGT

>srsc8\_006.7

log-odds matrix: alength= 4 w= 11 n= 1331 bayes= 8.79008 E= 2.3e+007

```
-823 -823 -823 175
-823 -823 229 -823
-158 -158 97 55
175 -823 -823 -823
17 -823 -823 117
55 -158 -158 55
-823 -823 70 117
-158 97 -158 55
-823 -823 -823 175
-158 -158 -158 137
-823 229 -823 -823
```

ALPHABET= ACGT

>srsc8\_006.8

log-odds matrix: alength= 4 w= 11 n= 1331 bayes= 8.79008 E= 2.1e+008

```
137 -158 -158 -158
175 -823 -823 -823
-158 184 -158 -158
55 -158 -158 55
55 -158 97 -158
-158 184 -158 -158
-158 -158 -158 137
-158 -158 -158 137
-823 -823 -823 175
-158 184 -158 -158
-823 -823 229 -823
```

ALPHABET= ACGT

>srsc8\_008.1

log-odds matrix: alength= 4 w= 15 n= 2152 bayes= 8.74618 E= 5.0e+012

```
-231 193 -231 -231
161 -231 -231 -231
-13 14 -231 71
-231 193 -231 -231
161 -231 -231 -231
-231 -231 -231 161
-231 -231 -231 161
-132 38 -132 87
123 14 -231 -231
87 -132 -132 16
-231 101 101 -231
-13 -231 101 -13
-231 -231 193 -231
123 14 -231 -231
161 -231 -231 -231
```

ALPHABET= ACGT

>srsc8\_008.2

log-odds matrix: alength= 4 w= 11 n= 2172 bayes= 8.75956 E= 3.1e+012

```
-231 -231 -231 161
161 -231 -231 -231
123 -231 -231 -13
```

74203Suppl emental \_CNSmatri ces. pssm. txt

|      |      |      |      |
|------|------|------|------|
| -231 | -231 | 193  | -231 |
| -132 | 114  | -132 | 16   |
| -231 | -231 | -231 | 161  |
| -231 | -231 | 193  | -231 |
| 123  | -231 | -231 | -13  |
| -132 | -132 | -132 | 135  |
| -231 | -231 | 14   | 123  |
| -231 | -231 | 193  | -231 |

ALPHABET= ACGT

>srsc8\_009.1

log-odds matrix: alength= 4 w= 40 n= 887 bayes= 8.20294 E= 1.0e-003

|      |      |      |      |
|------|------|------|------|
| -823 | 223  | -823 | -823 |
| 180  | -823 | -823 | -823 |
| -158 | -158 | 92   | 58   |
| 180  | -823 | -823 | -823 |
| -823 | 164  | -823 | 21   |
| 180  | -823 | -823 | -823 |
| 180  | -823 | -823 | -823 |
| -823 | -823 | 223  | -823 |
| -823 | -823 | 223  | -823 |
| -823 | -823 | -823 | 180  |
| 121  | -823 | 65   | -823 |
| -823 | -823 | 223  | -823 |
| -823 | -823 | -823 | 180  |
| 21   | -823 | 164  | -823 |
| 21   | -823 | 164  | -823 |
| 180  | -823 | -823 | -823 |
| -823 | 65   | 65   | 21   |
| -823 | 65   | 164  | -823 |
| 180  | -823 | -823 | -823 |
| -823 | -823 | 223  | -823 |
| -823 | 223  | -823 | -823 |
| -823 | -823 | -823 | 180  |
| -823 | 164  | -823 | 21   |
| -823 | -823 | -823 | 180  |
| -823 | -823 | -823 | 180  |
| 21   | -823 | 164  | -823 |
| 180  | -823 | -823 | -823 |
| -823 | -823 | 223  | -823 |
| -823 | 164  | -823 | 21   |
| -823 | -823 | -823 | 180  |
| -823 | -823 | 223  | -823 |
| -823 | -823 | -823 | 180  |
| -823 | -823 | -823 | 180  |
| -823 | 65   | -823 | 121  |
| 180  | -823 | -823 | -823 |
| -823 | 223  | -823 | -823 |
| -823 | -823 | -823 | 180  |
| 21   | -823 | 164  | -823 |
| 21   | 164  | -823 | -823 |
| -823 | 164  | 65   | -823 |

ALPHABET= ACGT

>srsc8\_009.2

log-odds matrix: alength= 4 w= 23 n= 938 bayes= 8.28386 E= 1.4e+002

|      |      |      |      |
|------|------|------|------|
| 180  | -823 | -823 | -823 |
| -823 | -823 | 223  | -823 |
| -823 | -823 | -823 | 180  |
| -823 | 223  | -823 | -823 |
| -823 | -823 | -823 | 180  |

74203Suppl emental \_CNSmatri ces. pssm. txt

```

180 -823 -823 -823
-823 65 -823 121
-158 179 -158 -158
121 -823 65 -823
-823 65 -823 121
-823 -823 223 -823
-823 -823 -823 180
-823 -823 -823 180
-823 65 164 -823
21 65 -823 21
-823 -823 -823 180
-823 -823 -823 180
-823 -823 -823 180
21 -823 65 21
-823 -823 -823 180
-823 223 -823 -823
180 -823 -823 -823
-823 -823 -823 180

```

ALPHABET= ACGT

>srsc8\_009.3

log-odds matrix: alength= 4 w= 11 n= 974 bayes= 8.33836 E= 1.6e+004

```

180 -823 -823 -823
21 -823 164 -823
-823 -823 -823 180
21 65 -823 21
-823 223 -823 -823
-823 164 65 -823
-823 -823 -823 180
-823 -823 -823 180
180 -823 -823 -823
180 -823 -823 -823
-823 223 -823 -823

```

ALPHABET= ACGT

>srsc8\_009.4

log-odds matrix: alength= 4 w= 11 n= 974 bayes= 8.33836 E= 2.8e+005

```

-823 -823 -823 180
-823 -823 -823 180
21 -823 65 21
-823 -823 223 -823
-823 -823 -823 180
-823 65 65 21
-823 -823 164 21
-823 -823 -823 180
21 65 -823 21
-823 223 -823 -823
-823 -823 -823 180

```

ALPHABET= ACGT

>srsc8\_009.5

log-odds matrix: alength= 4 w= 15 n= 962 bayes= 8.32042 E= 8.9e+006

```

121 -823 65 -823
121 -823 -823 21
21 -823 164 -823
180 -823 -823 -823
-823 -823 65 121
-823 -823 164 21
21 65 -823 21
-823 -823 -823 180

```

74203Suppl emental \_CNSmatri ces. pssm. txt

|      |      |      |      |
|------|------|------|------|
| 180  | -823 | -823 | -823 |
| 121  | 65   | -823 | -823 |
| -823 | 223  | -823 | -823 |
| 21   | -823 | -823 | 121  |
| -823 | 164  | -823 | 21   |
| 121  | -823 | 65   | -823 |
| -823 | 164  | -823 | 21   |

ALPHABET= ACGT

>srsc8\_009. 6

log-odds matrix: alength= 4 w= 15 n= 962 bayes= 8. 32042 E= 1. 0e+006

|      |      |      |      |
|------|------|------|------|
| -823 | -823 | 223  | -823 |
| -823 | -823 | -823 | 180  |
| 21   | -823 | -823 | 121  |
| 21   | 164  | -823 | -823 |
| 121  | -823 | 65   | -823 |
| -823 | 65   | 65   | 21   |
| -823 | 65   | -823 | 121  |
| -823 | -823 | -823 | 180  |
| 21   | -823 | 164  | -823 |
| -823 | 164  | -823 | 21   |
| -823 | 65   | -823 | 121  |
| 180  | -823 | -823 | -823 |
| -823 | -823 | -823 | 180  |
| -823 | -823 | 223  | -823 |
| 121  | -823 | -823 | 21   |

ALPHABET= ACGT

>srsc8\_009. 8

log-odds matrix: alength= 4 w= 10 n= 977 bayes= 8. 34282 E= 9. 7e+006

|      |      |      |      |
|------|------|------|------|
| -823 | -823 | 65   | 121  |
| -823 | -823 | 164  | 21   |
| 180  | -823 | -823 | -823 |
| 21   | 65   | -823 | 21   |
| -823 | -823 | 65   | 121  |
| 121  | -823 | -823 | 21   |
| -823 | 223  | -823 | -823 |
| -823 | 65   | -823 | 121  |
| 21   | -823 | -823 | 121  |
| -823 | 223  | -823 | -823 |

ALPHABET= ACGT

>srsc8\_016. 1

log-odds matrix: alength= 4 w= 42 n= 881 bayes= 8. 77972 E= 3. 9e+002

|      |      |      |      |
|------|------|------|------|
| -765 | -765 | 253  | -765 |
| 161  | -765 | -765 | -765 |
| -765 | 253  | -765 | -765 |
| -765 | -765 | -765 | 161  |
| 61   | -765 | -765 | 61   |
| 161  | -765 | -765 | -765 |
| -765 | -765 | -765 | 161  |
| -765 | 253  | -765 | -765 |
| -765 | -765 | -765 | 161  |
| -765 | 253  | -765 | -765 |
| -765 | 253  | -765 | -765 |
| 161  | -765 | -765 | -765 |
| -765 | -765 | -765 | 161  |
| -765 | 253  | -765 | -765 |
| -765 | 253  | -765 | -765 |
| -765 | 253  | -765 | -765 |

74203Suppl emental \_CNSmatri ces. pssm. txt

|      |      |      |      |
|------|------|------|------|
| 161  | -765 | -765 | -765 |
| -765 | 153  | -765 | 61   |
| -765 | -765 | -765 | 161  |
| -765 | -765 | -765 | 161  |
| 61   | -765 | 153  | -765 |
| -765 | -765 | -765 | 161  |
| -765 | -765 | 253  | -765 |
| 161  | -765 | -765 | -765 |
| 161  | -765 | -765 | -765 |
| -765 | -765 | -765 | 161  |
| 61   | 153  | -765 | -765 |
| -765 | -765 | -765 | 161  |
| 161  | -765 | -765 | -765 |
| -765 | 253  | -765 | -765 |
| -765 | -765 | -765 | 161  |
| 161  | -765 | -765 | -765 |
| 161  | -765 | -765 | -765 |
| 161  | -765 | -765 | -765 |
| 61   | -765 | -765 | 61   |
| -765 | -765 | -765 | 161  |
| -765 | -765 | -765 | 161  |
| -765 | -765 | -765 | 161  |
| -765 | 253  | -765 | -765 |
| -765 | -765 | -765 | 161  |
| -765 | -765 | 253  | -765 |
| 161  | -765 | -765 | -765 |

ALPHABET= ACGT

>srsr8\_016.2

log-odds matrix: al length= 4 w= 50 n= 865 bayes= 8.75322 E= 8.8e+002

|      |      |      |      |
|------|------|------|------|
| -765 | -765 | -765 | 161  |
| -765 | -765 | -765 | 161  |
| 161  | -765 | -765 | -765 |
| -765 | 253  | -765 | -765 |
| -765 | -765 | -765 | 161  |
| -765 | -765 | -765 | 161  |
| -765 | 253  | -765 | -765 |
| 61   | -765 | 153  | -765 |
| -765 | 253  | -765 | -765 |
| 61   | 153  | -765 | -765 |
| -765 | -765 | -765 | 161  |
| -765 | -765 | -765 | 161  |
| -765 | 253  | -765 | -765 |
| 161  | -765 | -765 | -765 |
| 161  | -765 | -765 | -765 |
| 161  | -765 | -765 | -765 |
| -765 | -765 | -765 | 161  |
| 61   | -765 | 153  | -765 |
| -765 | -765 | -765 | 161  |
| -765 | 153  | -765 | 61   |
| -765 | -765 | -765 | 161  |
| -765 | -765 | 253  | -765 |
| -765 | -765 | -765 | 161  |
| -765 | 153  | -765 | 61   |
| 161  | -765 | -765 | -765 |
| 161  | -765 | -765 | -765 |
| -765 | 253  | -765 | -765 |
| -765 | -765 | -765 | 161  |
| -765 | -765 | -765 | 161  |
| 61   | -765 | 153  | -765 |
| -765 | -765 | -765 | 161  |
| 161  | -765 | -765 | -765 |



74203Suppl emental \_CNSmatri ces. pssm. txt

|      |      |      |      |
|------|------|------|------|
| 61   | -765 | 153  | -765 |
| -765 | 253  | -765 | -765 |
| -765 | -765 | 253  | -765 |
| -765 | -765 | -765 | 161  |
| 61   | -765 | 153  | -765 |
| 161  | -765 | -765 | -765 |
| -765 | -765 | -765 | 161  |
| -765 | -765 | -765 | 161  |
| -765 | -765 | -765 | 161  |
| -765 | -765 | -765 | 161  |
| -765 | -765 | 253  | -765 |
| 161  | -765 | -765 | -765 |
| 161  | -765 | -765 | -765 |
| -765 | 253  | -765 | -765 |
| -765 | 253  | -765 | -765 |
| 161  | -765 | -765 | -765 |
| -765 | 253  | -765 | -765 |

ALPHABET= ACGT

>srs8\_016.3

log-odds matrix: alength= 4 w= 30 n= 905 bayes= 8.81858 E= 1.9e+003

|      |      |      |      |
|------|------|------|------|
| 161  | -765 | -765 | -765 |
| 161  | -765 | -765 | -765 |
| -765 | -765 | 253  | -765 |
| -765 | 153  | -765 | 61   |
| -765 | -765 | -765 | 161  |
| -765 | -765 | 253  | -765 |
| -765 | -765 | 153  | 61   |
| -765 | 253  | -765 | -765 |
| -765 | 153  | -765 | 61   |
| -765 | -765 | -765 | 161  |
| -765 | -765 | 253  | -765 |
| 161  | -765 | -765 | -765 |
| -765 | -765 | 253  | -765 |
| 161  | -765 | -765 | -765 |
| 161  | -765 | -765 | -765 |
| 61   | -765 | -765 | 61   |
| -765 | -765 | -765 | 161  |
| -765 | -765 | 253  | -765 |
| 161  | -765 | -765 | -765 |
| -765 | 253  | -765 | -765 |
| 161  | -765 | -765 | -765 |
| 161  | -765 | -765 | -765 |
| -765 | -765 | 253  | -765 |
| -765 | 253  | -765 | -765 |
| -765 | -765 | -765 | 161  |
| 161  | -765 | -765 | -765 |
| 161  | -765 | -765 | -765 |
| 161  | -765 | -765 | -765 |
| -765 | -765 | -765 | 161  |

ALPHABET= ACGT

>srs8\_016.4

log-odds matrix: alength= 4 w= 25 n= 915 bayes= 8.83447 E= 5.3e+003

|      |      |      |      |
|------|------|------|------|
| -765 | -765 | 253  | -765 |
| 161  | -765 | -765 | -765 |
| -765 | -765 | -765 | 161  |
| -765 | -765 | -765 | 161  |
| -765 | -765 | -765 | 161  |

74203Suppl emental \_CNSmatri ces. pssm. txt

```

-765 -765 -765 161
-765 -765 253 -765
-765 -765 -765 161
161 -765 -765 -765
61 -765 153 -765
161 -765 -765 -765
-765 -765 -765 161
-765 -765 153 61
161 -765 -765 -765
161 -765 -765 -765
161 -765 -765 -765
-765 253 -765 -765
-765 -765 -765 161
-765 -765 253 -765
-765 -765 253 -765
-765 -765 -765 161
-765 -765 253 -765
161 -765 -765 -765
161 -765 -765 -765
161 -765 -765 -765

```

ALPHABET= ACGT

>srsc8\_016. 6

log-odds matrix: alength= 4 w= 13 n= 939 bayes= 8.87191 E= 2.1e+004

```

-765 -765 -765 161
-765 253 -765 -765
-765 -765 -765 161
-765 -765 -765 161
-765 153 153 -765
-765 -765 -765 161
-765 -765 -765 161
-765 -765 -765 161
-765 -765 253 -765
161 -765 -765 -765
-765 -765 -765 161
-765 -765 -765 161
-765 253 -765 -765

```

ALPHABET= ACGT

>srsc8\_016. 8

log-odds matrix: alength= 4 w= 11 n= 943 bayes= 8.87805 E= 4.1e+004

```

-765 -765 253 -765
-765 153 -765 61
-765 -765 -765 161
-765 -765 -765 161
-765 -765 253 -765
61 153 -765 -765
-765 -765 -765 161
-765 -765 -765 161
-765 253 -765 -765
61 153 -765 -765
-765 -765 253 -765

```

ALPHABET= ACGT

>srsc8\_020. 4

log-odds matrix: alength= 4 w= 11 n= 664 bayes= 8.37069 E= 8.5e+004

```

194 -765 -765 -765
-765 105 105 -765
194 -765 -765 -765
94 -765 105 -765

```

74203Suppl emental \_CNSmatri ces. pssm. txt

|      |      |      |      |
|------|------|------|------|
| 94   | -765 | -765 | 94   |
| -765 | -765 | -765 | 194  |
| -765 | -765 | 205  | -765 |
| -765 | -765 | 205  | -765 |
| 194  | -765 | -765 | -765 |
| 194  | -765 | -765 | -765 |
| -765 | -765 | -765 | 194  |

ALPHABET= ACGT

>srsc9\_004. 1

log-odds matrix: alength= 4 w= 25 n= 963 bayes= 7. 58195 E= 3. 8e-006

|      |      |      |      |
|------|------|------|------|
| -897 | 100  | -897 | 99   |
| -897 | -897 | -897 | 173  |
| -897 | -897 | 233  | -897 |
| -59  | 200  | -897 | -897 |
| -897 | -897 | -897 | 173  |
| 99   | -897 | 1    | -59  |
| -897 | 233  | -897 | -897 |
| 173  | -897 | -897 | -897 |
| -897 | -897 | 233  | -897 |
| -897 | -897 | 233  | -897 |
| -897 | -897 | -897 | 173  |
| 141  | -897 | 1    | -897 |
| 141  | 1    | -897 | -897 |
| -897 | 1    | -897 | 141  |
| 141  | -897 | -897 | -59  |
| -897 | -897 | -897 | 173  |
| -897 | -897 | 1    | 141  |
| -897 | 159  | -897 | 41   |
| 99   | -897 | 100  | -897 |
| -897 | 1    | 1    | 99   |
| -897 | 1    | -897 | 141  |
| -897 | -897 | -897 | 173  |
| -897 | 1    | -897 | 141  |
| -897 | 100  | -897 | 99   |
| -897 | -897 | 1    | 141  |

ALPHABET= ACGT

>srsc9\_004. 3

log-odds matrix: alength= 4 w= 11 n= 1033 bayes= 7. 6837 E= 9. 9e+004

|      |      |      |      |
|------|------|------|------|
| -897 | -897 | -897 | 173  |
| -897 | 159  | -897 | 41   |
| 173  | -897 | -897 | -897 |
| -59  | -897 | 200  | -897 |
| -897 | 233  | -897 | -897 |
| 99   | -897 | -897 | 41   |
| -897 | 1    | -897 | 141  |
| 141  | 1    | -897 | -897 |
| -897 | 1    | 1    | 99   |
| -59  | -897 | -897 | 141  |
| -897 | -897 | -897 | 173  |

ALPHABET= ACGT

>srsc9\_004. 4

log-odds matrix: alength= 4 w= 27 n= 953 bayes= 7. 56682 E= 4. 9e+011

|      |      |      |      |
|------|------|------|------|
| 113  | -231 | 27   | -231 |
| 61   | 27   | 27   | -231 |
| -231 | -231 | -231 | 151  |
| -21  | 27   | -231 | 61   |
| 113  | 27   | -231 | -231 |

74203Suppl emental \_CNSmatri ces. pssm. txt

|      |      |      |      |
|------|------|------|------|
| -21  | -231 | -231 | 113  |
| -231 | -231 | 27   | 113  |
| -231 | 114  | 27   | -21  |
| -21  | -231 | -231 | 113  |
| -21  | 168  | -231 | -231 |
| 61   | 27   | 27   | -231 |
| -231 | -231 | -231 | 151  |
| -21  | 27   | 114  | -231 |
| -231 | -231 | 114  | 61   |
| 113  | -231 | -231 | -21  |
| 113  | 27   | -231 | -231 |
| -21  | 114  | 27   | -231 |
| -231 | 27   | -231 | 113  |
| -21  | -231 | 114  | -21  |
| -231 | -231 | 114  | 61   |
| -897 | -897 | -897 | 173  |
| -897 | -897 | 1    | 141  |
| -59  | -897 | 100  | 41   |
| 41   | -897 | 159  | -897 |
| 141  | -897 | -897 | -59  |
| 41   | -897 | 100  | -59  |
| -897 | 1    | -897 | 141  |

ALPHABET= ACGT

>srsc9\_004. 7

log-odds matrix: al length= 4 w= 20 n= 988 bayes= 7. 61912 E= 3. 3e+012

|      |      |      |      |
|------|------|------|------|
| -132 | 127  | -132 | 9    |
| -132 | 127  | -132 | 9    |
| 9    | -132 | 127  | -132 |
| -132 | 49   | -132 | 79   |
| -74  | -74  | 68   | 34   |
| 9    | -132 | 127  | -132 |
| -231 | 207  | -231 | -231 |
| 61   | -231 | -231 | 61   |
| -231 | -231 | 114  | 61   |
| 61   | -231 | 27   | -21  |
| -21  | -231 | 27   | 61   |
| -21  | -231 | 27   | 61   |
| -21  | 27   | -231 | 61   |
| -231 | 114  | -231 | 61   |
| -21  | 27   | -231 | 61   |
| -21  | -231 | -231 | 113  |
| -231 | -231 | 27   | 113  |
| -231 | 114  | -231 | 61   |
| -21  | -231 | 114  | -21  |
| 113  | -231 | -231 | -21  |

ALPHABET= ACGT

>srsc9\_004. 8

log-odds matrix: al length= 4 w= 10 n= 1038 bayes= 7. 6907 E= 2. 1e+012

|      |      |      |      |
|------|------|------|------|
| -231 | 27   | 168  | -231 |
| 113  | -231 | -231 | -21  |
| -21  | 114  | -231 | -21  |
| -21  | 168  | -231 | -231 |
| 113  | -231 | 27   | -231 |
| -21  | 27   | 114  | -231 |
| -231 | -231 | 114  | 61   |
| -231 | -231 | -231 | 151  |
| -21  | -231 | -231 | 113  |
| -21  | -231 | 168  | -231 |

74203Suppl emental \_CNSmatri ces. pssm. txt

ALPHABET= ACGT

>srsc9\_005. 1

log-odds matrix: al ength= 4 w= 15 n= 1292 bayes= 8. 00787 E= 7. 0e+011

|      |      |      |      |
|------|------|------|------|
| 155  | -231 | -231 | -231 |
| -231 | -231 | -231 | 155  |
| -231 | -231 | -231 | 155  |
| -231 | 202  | -231 | -231 |
| 116  | 22   | -231 | -231 |
| 64   | -231 | 22   | -18  |
| 64   | -231 | -231 | 64   |
| -231 | 22   | -231 | 116  |
| -18  | -231 | -231 | 116  |
| -231 | 163  | -231 | -18  |
| 64   | -231 | -231 | 64   |
| -231 | -231 | 202  | -231 |
| -231 | 109  | 22   | -18  |
| -231 | -231 | -231 | 155  |
| -231 | -231 | -231 | 155  |

ALPHABET= ACGT

>srsc9\_005. 2

log-odds matrix: al ength= 4 w= 12 n= 1307 bayes= 8. 02459 E= 1. 7e+012

|      |      |      |      |
|------|------|------|------|
| -231 | -231 | -231 | 155  |
| -18  | -231 | -231 | 116  |
| -231 | 163  | -231 | -18  |
| -231 | 22   | -231 | 116  |
| -231 | -231 | 22   | 116  |
| -231 | 163  | -231 | -18  |
| -18  | -231 | -231 | 116  |
| -231 | 22   | -231 | 116  |
| -231 | -231 | 163  | -18  |
| -231 | 163  | -231 | -18  |
| -18  | -231 | -231 | 116  |
| -231 | -231 | 202  | -231 |

ALPHABET= ACGT

>srsc9\_005. 6

log-odds matrix: al ength= 4 w= 11 n= 1312 bayes= 8. 03012 E= 1. 6e+013

|      |      |      |      |
|------|------|------|------|
| -132 | -132 | -132 | 129  |
| -132 | -132 | -132 | 129  |
| -132 | -132 | -132 | 129  |
| -132 | 122  | -132 | 11   |
| 82   | -132 | -132 | 11   |
| 11   | -132 | 45   | 11   |
| -132 | 122  | -132 | 11   |
| -132 | -132 | 45   | 82   |
| -132 | -132 | -132 | 129  |
| -132 | 122  | -132 | 11   |
| -132 | 172  | -132 | -132 |

ALPHABET= ACGT

>srsc9\_005. 7

log-odds matrix: al ength= 4 w= 11 n= 1312 bayes= 8. 03012 E= 1. 5e+013

|      |      |      |      |
|------|------|------|------|
| 129  | -132 | -132 | -132 |
| -132 | -132 | 172  | -132 |
| 82   | -132 | 45   | -132 |
| 11   | -132 | 45   | 11   |
| 11   | 122  | -132 | -132 |
| 82   | -132 | -132 | 11   |

74203Supplemental\_CNSmatrices.pssm.txt

```
-132  -132  172  -132
-132  122  -132  11
 82   -132  -132  11
-132  172  -132  -132
129   -132  -132  -132
```

ALPHABET= ACGT

>srsc9\_007.10

log-odds matrix: alength= 4 w= 11 n= 820 bayes= 8.67596 E= 2.9e+004

```
-765  -765  247  -765
 164  -765  -765  -765
 164  -765  -765  -765
 164  -765  -765  -765
 164  -765  -765  -765
-765  -765  -765  164
-765  -765  247  -765
 164  -765  -765  -765
 164  -765  -765  -765
 164  -765  -765  -765
 164  -765  -765  -765
```

ALPHABET= ACGT

>srsc9\_007.1

log-odds matrix: alength= 4 w= 17 n= 808 bayes= 8.65464 E= 5.4e+002

```
-765  247  -765  -765
-765  -765  -765  164
 64   -765  147  -765
-765  -765  247  -765
 164  -765  -765  -765
-765  247  -765  -765
-765  -765  -765  164
 164  -765  -765  -765
-765  247  -765  -765
-765  -765  247  -765
-765  -765  247  -765
 164  -765  -765  -765
-765  -765  247  -765
 164  -765  -765  -765
-765  247  -765  -765
 64   -765  147  -765
-765  247  -765  -765
```

ALPHABET= ACGT

>srsc9\_007.2

log-odds matrix: alength= 4 w= 10 n= 822 bayes= 8.67948 E= 5.4e+003

```
-765  -765  247  -765
-765  -765  -765  164
-765  -765  247  -765
-765  247  -765  -765
 164  -765  -765  -765
-765  -765  247  -765
 164  -765  -765  -765
 164  -765  -765  -765
 64   147  -765  -765
-765  247  -765  -765
```

ALPHABET= ACGT

>srsc9\_007.3

log-odds matrix: alength= 4 w= 20 n= 802 bayes= 8.64386 E= 8.1e+003

74203Suppl emental \_CNSmatri ces. pssm. txt

|      |      |      |      |
|------|------|------|------|
| -765 | 247  | -765 | -765 |
| 164  | -765 | -765 | -765 |
| -765 | -765 | 247  | -765 |
| 164  | -765 | -765 | -765 |
| 164  | -765 | -765 | -765 |
| -765 | -765 | 247  | -765 |
| -765 | 147  | 147  | -765 |
| -765 | -765 | -765 | 164  |
| 164  | -765 | -765 | -765 |
| 164  | -765 | -765 | -765 |
| -765 | 147  | -765 | 64   |
| 64   | -765 | 147  | -765 |
| -765 | 247  | -765 | -765 |
| -765 | -765 | -765 | 164  |
| -765 | -765 | 247  | -765 |
| 64   | -765 | 147  | -765 |
| -765 | 247  | -765 | -765 |
| 164  | -765 | -765 | -765 |
| 164  | -765 | -765 | -765 |
| 164  | -765 | -765 | -765 |

ALPHABET= ACGT

>srsc9\_007. 5

log-odds matrix: alength= 4 w= 15 n= 812 bayes= 8.66178 E= 1.2e+004

|      |      |      |      |
|------|------|------|------|
| -765 | -765 | 247  | -765 |
| 164  | -765 | -765 | -765 |
| -765 | -765 | 247  | -765 |
| 64   | -765 | -765 | 64   |
| -765 | -765 | -765 | 164  |
| -765 | 147  | 147  | -765 |
| -765 | -765 | -765 | 164  |
| -765 | 247  | -765 | -765 |
| -765 | -765 | -765 | 164  |
| -765 | 147  | -765 | 64   |
| 164  | -765 | -765 | -765 |
| -765 | -765 | -765 | 164  |
| -765 | -765 | 247  | -765 |
| -765 | -765 | -765 | 164  |
| -765 | -765 | 247  | -765 |

ALPHABET= ACGT

>srsc9\_007. 6

log-odds matrix: alength= 4 w= 15 n= 812 bayes= 8.66178 E= 1.3e+004

|      |      |      |      |
|------|------|------|------|
| 164  | -765 | -765 | -765 |
| -765 | -765 | 247  | -765 |
| 164  | -765 | -765 | -765 |
| 164  | -765 | -765 | -765 |
| -765 | 247  | -765 | -765 |
| -765 | -765 | -765 | 164  |
| -765 | -765 | -765 | 164  |
| 164  | -765 | -765 | -765 |
| 64   | -765 | -765 | 64   |
| 164  | -765 | -765 | -765 |
| -765 | -765 | 247  | -765 |
| -765 | -765 | -765 | 164  |
| 164  | -765 | -765 | -765 |
| 164  | -765 | -765 | -765 |
| -765 | -765 | 247  | -765 |

ALPHABET= ACGT

&gt;srsc9\_007. 7

log-odds matrix: al length= 4 w= 15 n= 812 bayes= 8. 66178 E= 1. 9e+004

|      |      |      |      |
|------|------|------|------|
| 164  | -765 | -765 | -765 |
| -765 | -765 | -765 | 164  |
| -765 | -765 | 247  | -765 |
| -765 | -765 | 247  | -765 |
| 64   | -765 | 147  | -765 |
| -765 | -765 | -765 | 164  |
| -765 | 247  | -765 | -765 |
| 164  | -765 | -765 | -765 |
| 64   | -765 | 147  | -765 |
| -765 | -765 | -765 | 164  |
| 164  | -765 | -765 | -765 |
| 164  | -765 | -765 | -765 |
| -765 | -765 | -765 | 164  |
| 164  | -765 | -765 | -765 |
| -765 | 247  | -765 | -765 |

ALPHABET= ACGT

&gt;srsc9\_007. 8

log-odds matrix: al length= 4 w= 20 n= 802 bayes= 8. 64386 E= 2. 3e+004

|      |      |      |      |
|------|------|------|------|
| 164  | -765 | -765 | -765 |
| -765 | -765 | 247  | -765 |
| 64   | -765 | -765 | 64   |
| -765 | -765 | 247  | -765 |
| 164  | -765 | -765 | -765 |
| -765 | -765 | -765 | 164  |
| 64   | -765 | 147  | -765 |
| 64   | -765 | 147  | -765 |
| -765 | 247  | -765 | -765 |
| -765 | -765 | -765 | 164  |
| -765 | -765 | -765 | 164  |
| -765 | -765 | -765 | 164  |
| -765 | 147  | -765 | 64   |
| 164  | -765 | -765 | -765 |
| 164  | -765 | -765 | -765 |
| -765 | -765 | -765 | 164  |
| -765 | -765 | 247  | -765 |
| -765 | -765 | -765 | 164  |
| 164  | -765 | -765 | -765 |
| -765 | 247  | -765 | -765 |

ALPHABET= ACGT

&gt;srsc9\_007. 9

log-odds matrix: al length= 4 w= 11 n= 820 bayes= 8. 67596 E= 2. 9e+004

|      |      |      |      |
|------|------|------|------|
| -765 | -765 | -765 | 164  |
| 164  | -765 | -765 | -765 |
| 164  | -765 | -765 | -765 |
| 164  | -765 | -765 | -765 |
| -765 | -765 | 247  | -765 |
| -765 | -765 | -765 | 164  |
| 164  | -765 | -765 | -765 |
| 164  | -765 | -765 | -765 |
| -765 | -765 | 247  | -765 |
| 164  | -765 | -765 | -765 |
| -765 | -765 | -765 | 164  |

ALPHABET= ACGT

&gt;srsc9\_013. 1

log-odds matrix: al length= 4 w= 13 n= 940 bayes= 8. 87344 E= 2. 0e+003



74203Suppl emental \_CNSmatri ces. pssm. txt

|      |      |      |      |
|------|------|------|------|
| -765 | 219  | -765 | -765 |
| 182  | -765 | -765 | -765 |
| -765 | -765 | 219  | -765 |
| -765 | -765 | 219  | -765 |
| -765 | 219  | -765 | -765 |
| -765 | -765 | -765 | 182  |
| 182  | -765 | -765 | -765 |
| -765 | 219  | -765 | -765 |
| -765 | 219  | -765 | -765 |
| -765 | -765 | -765 | 182  |
| -765 | -765 | -765 | 182  |
| -765 | 219  | -765 | -765 |
| -765 | 219  | -765 | -765 |

ALPHABET= ACGT

>srsc9\_013. 2

log-odds matrix: alength= 4 w= 25 n= 916 bayes= 8. 83605 E= 1. 0e+004

|      |      |      |      |
|------|------|------|------|
| -765 | -765 | -765 | 182  |
| -765 | 219  | -765 | -765 |
| -765 | -765 | -765 | 182  |
| 83   | -765 | 119  | -765 |
| -765 | 219  | -765 | -765 |
| -765 | -765 | -765 | 182  |
| -765 | -765 | 219  | -765 |
| 182  | -765 | -765 | -765 |
| -765 | -765 | -765 | 182  |
| -765 | -765 | -765 | 182  |
| -765 | -765 | -765 | 182  |
| 182  | -765 | -765 | -765 |
| -765 | -765 | 219  | -765 |
| -765 | -765 | 119  | 83   |
| -765 | -765 | -765 | 182  |
| -765 | -765 | -765 | 182  |
| -765 | -765 | -765 | 182  |
| 182  | -765 | -765 | -765 |
| -765 | -765 | 219  | -765 |
| -765 | -765 | 219  | -765 |
| -765 | -765 | -765 | 182  |
| 182  | -765 | -765 | -765 |
| -765 | 119  | -765 | 83   |
| -765 | 219  | -765 | -765 |
| -765 | -765 | -765 | 182  |

ALPHABET= ACGT

>srsc9\_013. 3

log-odds matrix: alength= 4 w= 11 n= 944 bayes= 8. 87958 E= 3. 3e+004

|      |      |      |      |
|------|------|------|------|
| -765 | -765 | -765 | 182  |
| -765 | -765 | 219  | -765 |
| -765 | -765 | -765 | 182  |
| -765 | -765 | -765 | 182  |
| -765 | -765 | -765 | 182  |
| 182  | -765 | -765 | -765 |
| -765 | 219  | -765 | -765 |
| 182  | -765 | -765 | -765 |
| 83   | -765 | -765 | 83   |
| -765 | -765 | 219  | -765 |
| -765 | 219  | -765 | -765 |

ALPHABET= ACGT

>srsc9\_013. 4

74203Suppl emental \_CNSmatri ces. pssm. txt

log-odds matrix: alength= 4 w= 11 n= 944 bayes= 8.87958 E= 4.3e+004

|      |      |      |      |
|------|------|------|------|
| -765 | -765 | -765 | 182  |
| 182  | -765 | -765 | -765 |
| -765 | -765 | -765 | 182  |
| -765 | -765 | -765 | 182  |
| 182  | -765 | -765 | -765 |
| -765 | -765 | -765 | 182  |
| -765 | 219  | -765 | -765 |
| 182  | -765 | -765 | -765 |
| -765 | 219  | -765 | -765 |
| 182  | -765 | -765 | -765 |
| 182  | -765 | -765 | -765 |

ALPHABET= ACGT

>srsc9\_013.5

log-odds matrix: alength= 4 w= 13 n= 940 bayes= 8.87344 E= 5.0e+004

|      |      |      |      |
|------|------|------|------|
| -765 | -765 | 219  | -765 |
| -765 | -765 | -765 | 182  |
| 182  | -765 | -765 | -765 |
| 182  | -765 | -765 | -765 |
| -765 | -765 | 219  | -765 |
| 182  | -765 | -765 | -765 |
| -765 | -765 | -765 | 182  |
| -765 | 119  | -765 | 83   |
| 83   | -765 | -765 | 83   |
| -765 | 219  | -765 | -765 |
| -765 | 219  | -765 | -765 |
| -765 | -765 | -765 | 182  |
| 182  | -765 | -765 | -765 |

ALPHABET= ACGT

>srsc9\_013.6

log-odds matrix: alength= 4 w= 11 n= 944 bayes= 8.87958 E= 5.7e+004

|      |      |      |      |
|------|------|------|------|
| -765 | -765 | -765 | 182  |
| -765 | -765 | -765 | 182  |
| -765 | 219  | -765 | -765 |
| -765 | 219  | -765 | -765 |
| 83   | 119  | -765 | -765 |
| -765 | 119  | -765 | 83   |
| -765 | 219  | -765 | -765 |
| 83   | -765 | 119  | -765 |
| -765 | -765 | 219  | -765 |
| -765 | -765 | -765 | 182  |
| -765 | 219  | -765 | -765 |
