# Supplementary material
Source: PubMed Central journal article supplement (PMC1435799)
Supplement: plntphys_140_4_1183__6.pdf [file plntphys_140_4_1183__6.pdf]

## Supplemental Figure Legends (Feltus\_etal)

### Supplemental Fig. 1 DNA polymorphism classes in 4 grass genera

The absolute number of each polymorphism type averaged over each pair-wise genotype comparison is shown. TOTAL = total number of polymorphism; SNP = single nucleotide polymorphism; EXTENDED = polymorphisms greater than one nucleotide; INDEL = insertion-deletion. Error bars indicate SEM. There is no error bar for *Pennisetum* or *Cynodon* because only two genotypes were tested.

### Supplemental Fig. 2 Polymorphism rates in 4 grass genera.

The total polymorphism and SNP rates for *Oryza*, *Sorghum*, *Pennisetum* and *Cynodon* grass genera and an average rate for each pair-wise comparison is shown. The Y-axis shows the polymorphism rate and the X-axis shows the two genotypes being compared. Black bars (■) indicate SNP per kilobase and white bars (□) indicate total polymorphisms per kilobase.

### Supplemental Fig. 3 PolyFinder vs. Polybayes comparison.

The number of monomorphic loci, polymorphic loci, and total SNPs detected are shown. Black bars (■) indicate Phrap/Polybayes method and white bars (□) indicate ClustalW/PolyFinder method.

#### **Supplemental Fig. 4 D-S Loci Genomic Distributions**

D-loci are shown in green and S-loci are shown in red. The putative centromere location is shown in purple.
