# Supplementary material
Source: PubMed Central journal article supplement (PMC1435799)
Supplement: plntphys_140_4_1183__9.pdf [file plntphys_140_4_1183__9.pdf]

Feltus\_etal Supplemental Table II

| <b>Table II Intron-scanned loci and DNA polymorphisms: all genotype comparisons</b> |                                                | <b>SCANNED LOCI</b> |             |              | <b>POLYMORPHISM CLASSES</b> |               |              |              |
|-------------------------------------------------------------------------------------|------------------------------------------------|---------------------|-------------|--------------|-----------------------------|---------------|--------------|--------------|
| <b>Species</b>                                                                      | <b>Genotypic pair</b>                          | <b>MONO</b>         | <b>POLY</b> | <b>TOTAL</b> | <b>SNP</b>                  | <b>EXTEND</b> | <b>INDEL</b> | <b>TOTAL</b> |
| <i>Sorghum</i>                                                                      | S. propinquum vs S. bicolor (BTX623)           | 7                   | 67          | 74           | 171                         | 33            | 24           | 228          |
|                                                                                     | S. propinquum vs S. bicolor (IS 18851)         | 6                   | 68          | 74           | 170                         | 33            | 30           | 233          |
|                                                                                     | S. bicolor (BTX623) vs S. bicolor (IS18551)    | 69                  | 35          | 104          | 50                          | 6             | 9            | 65           |
| <i>Oryza</i>                                                                        | CT99 vs IR62 ( <i>japonica x indica</i> )      | 14                  | 35          | 46           | 66                          | 42            | 7            | 115          |
|                                                                                     | CT99 vs Azucena ( <i>japonica x japonica</i> ) | 20                  | 38          | 58           | 61                          | 41            | 13           | 115          |
|                                                                                     | CT99 vs IR20 ( <i>japonica x indica</i> )      | 13                  | 34          | 47           | 111                         | 16            | 16           | 143          |
|                                                                                     | CT99 vs IR58 ( <i>japonica x indica</i> )      | 6                   | 13          | 19           | 49                          | 3             | 9            | 61           |
|                                                                                     | CT99 vs IR52 ( <i>japonica x indica</i> )      | 6                   | 17          | 23           | 31                          | 6             | 13           | 50           |
|                                                                                     | CT99 vs NOOT ( <i>japonica x indica</i> )      | 16                  | 50          | 66           | 179                         | 78            | 15           | 272          |
|                                                                                     | CT99 vs IR64 ( <i>japonica x indica</i> )      | 15                  | 37          | 52           | 126                         | 37            | 13           | 176          |
|                                                                                     | IR62 vs AZUC ( <i>indica x japonica</i> )      | 13                  | 48          | 61           | 79                          | 25            | 9            | 113          |
|                                                                                     | IR62 vs IR20 ( <i>indica x indica</i> )        | 10                  | 27          | 37           | 64                          | 14            | 11           | 89           |
|                                                                                     | IR62 vs IR58 ( <i>indica x indica</i> )        | 3                   | 8           | 11           | 8                           | 1             | 3            | 12           |
|                                                                                     | IR62 vs IR52 ( <i>indica x indica</i> )        | 3                   | 10          | 13           | 31                          | 7             | 6            | 44           |
|                                                                                     | IR62 vs NOOT ( <i>indica x indica</i> )        | 9                   | 33          | 42           | 119                         | 79            | 7            | 205          |
|                                                                                     | IR62 vs IR64 ( <i>indica x indica</i> )        | 12                  | 18          | 30           | 49                          | 27            | 4            | 80           |
|                                                                                     | Azucena vs IR20 ( <i>japonica x indica</i> )   | 15                  | 40          | 58           | 148                         | 17            | 17           | 182          |
|                                                                                     | Azucena vs IR58 ( <i>japonica x indica</i> )   | 8                   | 13          | 21           | 76                          | 4             | 6            | 86           |
|                                                                                     | Azucena vs IR52 ( <i>japonica x indica</i> )   | 7                   | 19          | 26           | 41                          | 7             | 13           | 61           |
|                                                                                     | Azucena vs NOOT ( <i>japonica x indica</i> )   | 16                  | 48          | 64           | 203                         | 96            | 18           | 317          |
|                                                                                     | Azucena vs IR64 ( <i>japonica x indica</i> )   | 19                  | 44          | 63           | 157                         | 34            | 11           | 202          |
|                                                                                     | IR20 vs IR58 ( <i>indica x indica</i> )        | 8                   | 9           | 17           | 27                          | 7             | 7            | 41           |
|                                                                                     | IR20 vs IR52 ( <i>indica x indica</i> )        | 7                   | 12          | 19           | 68                          | 3             | 8            | 79           |
|                                                                                     | IR20 vs NOOT ( <i>indica x indica</i> )        | 12                  | 31          | 43           | 68                          | 11            | 6            | 85           |
|                                                                                     | IR20 vs IR64 ( <i>indica x indica</i> )        | 14                  | 30          | 44           | 56                          | 10            | 14           | 80           |
|                                                                                     | IR58 vs IR52 ( <i>japonica x indica</i> )      | 7                   | 14          | 21           | 81                          | 7             | 14           | 102          |
|                                                                                     | IR58 vs NOOT ( <i>indica x indica</i> )        | 7                   | 10          | 17           | 11                          | 1             | 4            | 16           |
|                                                                                     | IR58 vs IR64 ( <i>indica x indica</i> )        | 7                   | 6           | 13           | 7                           | 1             | 4            | 12           |
|                                                                                     | IR52 vs NOOT ( <i>indica x indica</i> )        | 6                   | 11          | 17           | 59                          | 2             | 9            | 70           |
|                                                                                     | IR52 vs IR64 ( <i>indica x indica</i> )        | 4                   | 12          | 16           | 82                          | 6             | 12           | 10           |
|                                                                                     | IR64 vs NOOT ( <i>indica x indica</i> )        | 16                  | 29          | 45           | 82                          | 46            | 9            | 137          |
| <i>Pennisetum</i>                                                                   | 841b vs 863b                                   | 71                  | 39          | 110          | 62                          | 10            | 11           | 83           |
| <i>Cynodon</i>                                                                      | T574 vs T89                                    | 45                  | 14          | 59           | 33                          | 6             | 4            | 43           |
