# Supplementary material
Source: PubMed Central journal article supplement (PMC1435799)
Supplement: plntphys_140_4_1183__10.pdf [file plntphys_140_4_1183__10.pdf]

## Supplemental Table III CISP Loci that Contain an SSR Signature

(Feltus\_etal)

| <u>SPECIES</u> | <u>LOCUS_ID</u> | <u>CISP_FORWARD</u>    | <u>CISP_REVERSE</u>    |
|----------------|-----------------|------------------------|------------------------|
| Oryza          | PRSC1_012       | GTGGTAGCATAATACAGTGG   | CTATGGTTAAATCAATGAGCCG |
| Oryza          | PRSC1_024       | CCGCAACAACGGCAAGAAG    | CTGTTGGATGAGCCCTTGG    |
| Oryza          | PRSC1_045       | GTACCTCTCACCAAAGCTTG   | TGTTCAAGGAAGGATTACTGG  |
| Oryza          | PRSC4_050       | ATGGCATCCTGTTTGACAAC   | TGAAGAGCACAGTCACAAAG   |
| Oryza          | SRSC10_007      | TGCTCCATAATTGATACCATC  | TGCTGATGGATTGGCTTTTG   |
| Oryza          | SRSC12_002      | CGAATACCAACACCACTAGC   | ACAAGCATGAGGAGAACCAC   |
| Oryza          | SRSC4_019       | CTGGAGGCAAATTTGGAGG    | TATCTGCCAGAAAAGCACG    |
| Oryza          | SRSC4_023       | CCTCAGCAACCTTGGACTTG   | AACAGCTTGTTCAGGCATG    |
| Oryza          | SRSC4_028       | ATCCGTTGACGAAGCTCTTG   | TCTACGCCTACACCTACTTC   |
| Sorghum        | PRSC1_010       | TGTCAACTGCATGCATTTTGTG | ATGGAAGTGGATGAGGCAAC   |
| Sorghum        | PRSC1_017       | AGATGCTTAAGAGTATGACC   | TCAGTTTGTTCATGCATTG    |
| Sorghum        | SRSC1_001       | GCCAAGTATCTGTACACATTTG | CTTCCTCCAGTTGATGAGAAG  |
| Sorghum        | SRSC10_008      | GGACTCCATGAATATCCATC   | CAAGGACTTTACTCTCCTTG   |
| Sorghum        | SRSC12_006      | TGCTGCTGTTTCTGCTATTG   | AGCTTCATGCCTGACCATTG   |
| Sorghum        | SRSC12_007      | CAAGCCAATACACCCAAAAC   | TGTAGGACTCGGAAGAATTG   |
| Sorghum        | SRSC12_009      | GATCCTTCACGTGTTCTCTG   | TCCAATGGAATGGCCAAC     |
| Sorghum        | SRSC2_002       | AGCTGGCCGTCTTCTACG     | AGTATCACGATCATCAGAGC   |
| Sorghum        | SRSC2_014       | GTCAAGATCCTCTTCACCG    | GCACCTCAGTTACTCCTTC    |
| Sorghum        | SRSC2_015       | GTTGCCTGCCATTGCTTGTC   | CAGGAGAAGGAAATGGCTTG   |
| Sorghum        | SRSC3_019       | GGACGATTACTCTAGTTCTCC  | CTTGCAAGACCAGACATTGC   |
| Sorghum        | SRSC4_004       | TTATGCAGATTCTTAGCTTTGG | TCCTCCAAATTGGCCTCCAG   |
| Sorghum        | SRSC4_005       | CCTGCTAAAGAACACTATCAG  | TCTGAAGAGTCCTGATCCTC   |
| Sorghum        | SRSC4_018       | GGTGATCCCTGAAATGAAGG   | CCTCCAAATTGGCCTCCAGA   |
| Sorghum        | SRSC4_019       | CTGGAGGCAAATTTGGAGG    | TATCTGCCAGAAAAGCACG    |
| Sorghum        | SRSC5_005       | CCTTGCTGGTGATGAATTTG   | GAAGCAACAGCCAGATCAAC   |
| Sorghum        | SRSC7_019       | CTTGACCAAGCTCTTCATGG   | CATCCGCAGTTTGCATCTTC   |
| Sorghum        | SRSC8_002       | CATGGCACCACTAGACATAG   | GAAACTGACTTCATGATGGAG  |
| Sorghum        | SRSC9_002       | GCCCTCTCCAGCATGAAAG    | CGTCACCTTGTACTGCTTC    |
| Pennisetum     | PRSC1_014       | CAACTGCATGCATTTTGTGC   | GCACCCAGCTGAAAGAAAAG   |
| Pennisetum     | PRSC1_015       | GTTGCCTCATCCACTTCCAT   | GCACCCAGCTGAAAGAAAAG   |
| Pennisetum     | PRSC10_069      | TATCCATCTCCAAGAGGATG   | AGGACTGGTGTGAAGCTTTC   |
| Pennisetum     | SRSC1_001       | GCCAAGTATCTGTACACATTTG | CTTCCTCCAGTTGATGAGAAG  |
| Pennisetum     | SRSC11_024      | GCTACTCTCCTCAAGTCATC   | CTCATCCATGGCAAGGATAC   |
| Pennisetum     | SRSC2_010       | GCGGATTCTCTGCAAATAG    | CCAGATGACACTGGTTTAGA   |
| Pennisetum     | SRSC3_013       | GGAAACGAGCTTTCTCCAAC   | GCAGCCTTCAAGATCTTGAG   |
| Pennisetum     | SRSC4_004       | TTATGCAGATTCTTAGCTTTGG | TCCTCCAAATTGGCCTCCAG   |
| Pennisetum     | SRSC4_019       | CTGGAGGCAAATTTGGAGG    | TATCTGCCAGAAAAGCACG    |
| Pennisetum     | SRSC4_031       | CGTCGAAGCAGTTCTGCTTG   | ACATACCCATTGACATTGGC   |
| Pennisetum     | SRSC6_018       | GCACAAGCAGGTCTTGAATC   | GCTGAAAGTGTCTTCCAAT    |
| Pennisetum     | SRSC7_008       | CTTTCCAGACCATTCCATAG   | GATGAGGAACCTTGAAGTTG   |
| Pennisetum     | SRSC8_006       | TGTTGGAGAGCTTCTTGAAC   | TATTTGCAAGCCTAGCTGTC   |
| Pennisetum     | SRSC8_021       | AAGTGGCGGTGAAGCTCATC   | GGAAGCAGACAAATAAGGTG   |
| Pennisetum     | SRSC9_013       | GGTGTCTTTATGGGTATCG    | AGCTCTTTGGAAGCAGCCAC   |
| Cynodon        | SRSC10_011      | CCTGCTTGATAGGAACTTG    | CATCAAGAACTGTACGAAGC   |
| Cynodon        | SRSC6_001       | TGAGGCTCACATGGAAGTTC   | GCTTGCCATAGCACCAAATG   |
