# Supplementary material
Source: PubMed Central journal article supplement (PMC1435799)
Supplement: plntphys_140_4_1183__11.pdf [file plntphys_140_4_1183__11.pdf]

**Supplemental Table IV Intron Exon Polymorphism Rates for Oryza (Feltus etal)**

| LOCUS_ID   | SPECIES | CONS_LENGTH | %EXON | INTRON_LENGTH | EXON_LENGTH | ALL_POLY | INTRON_POLY | EXON_POLY | INTRON_RATE | EXON_RATE |
|------------|---------|-------------|-------|---------------|-------------|----------|-------------|-----------|-------------|-----------|
| PRSC1_001  | RICE    | 167         | 0.40  | 100           | 67          | 0        | 0           | 0         | 0.0         | 0.0       |
| PRSC1_002  | RICE    | 509         | 0.46  | 274           | 235         | 2        | 2           | 0         | 7.3         | 0.0       |
| PRSC1_003  | RICE    | 528         | 0.11  | 472           | 56          | 6        | 6           | 0         | 12.7        | 0.0       |
| PRSC1_004  | RICE    | 289         | 0.08  | 267           | 22          | 3        | 3           | 0         | 11.2        | 0.0       |
| PRSC1_005  | RICE    | 538         | 0.13  | 467           | 71          | 5        | 5           | 0         | 10.7        | 0.0       |
| PRSC1_007  | RICE    | 202         | 0.59  | 82            | 120         | 0        | 0           | 0         | 0.0         | 0.0       |
| PRSC1_012  | RICE    | 247         | 0.14  | 213           | 34          | 0        | 0           | 0         | 0.0         | 0.0       |
| PRSC1_018  | RICE    | 279         | 0.47  | 149           | 130         | 1        | 1           | 0         | 6.7         | 0.0       |
| PRSC1_019  | RICE    | 203         | 0.34  | 134           | 69          | 0        | 0           | 0         | 0.0         | 0.0       |
| PRSC1_023  | RICE    | 532         | 0.05  | 503           | 29          | 2        | 2           | 0         | 4.0         | 0.0       |
| PRSC1_034  | RICE    | 430         | 0.40  | 259           | 171         | 1        | 1           | 0         | 3.9         | 0.0       |
| PRSC1_035  | RICE    | 533         | 0.05  | 504           | 29          | 3        | 3           | 0         | 6.0         | 0.0       |
| PRSC1_045  | RICE    | 535         | 0.16  | 451           | 84          | 4        | 4           | 0         | 8.9         | 0.0       |
| PRSC1_049  | RICE    | 344         | 0.12  | 303           | 41          | 0        | 0           | 0         | 0.0         | 0.0       |
| PRSC10_070 | RICE    | 541         | 0.24  | 411           | 130         | 1        | 1           | 0         | 2.4         | 0.0       |
| PRSC4_061  | RICE    | 412         | 0.25  | 311           | 101         | 0        | 0           | 0         | 0.0         | 0.0       |
| SRSC1_001  | RICE    | 598         | 0.22  | 464           | 134         | 3        | 3           | 0         | 6.5         | 0.0       |
| SRSC1_003  | RICE    | 220         | 0.19  | 178           | 42          | 2        | 2           | 0         | 11.2        | 0.0       |
| SRSC1_004  | RICE    | 445         | 0.04  | 425           | 20          | 5        | 5           | 0         | 11.8        | 0.0       |
| SRSC1_005  | RICE    | 432         | 0.55  | 195           | 237         | 1        | 1           | 0         | 5.1         | 0.0       |
| SRSC1_007  | RICE    | 388         | 0.52  | 188           | 200         | 3        | 3           | 0         | 16.0        | 0.0       |
| SRSC10_004 | RICE    | 296         | 0.09  | 269           | 27          | 0        | 0           | 0         | 0.0         | 0.0       |
| SRSC11_002 | RICE    | 528         | 0.22  | 410           | 118         | 2        | 2           | 0         | 4.9         | 0.0       |
| SRSC12_001 | RICE    | 412         | 0.18  | 338           | 74          | 3        | 3           | 0         | 8.9         | 0.0       |
| SRSC12_007 | RICE    | 537         | 0.08  | 496           | 41          | 15       | 15          | 0         | 30.2        | 0.0       |
| SRSC2_004  | RICE    | 294         | 0.16  | 246           | 48          | 0        | 0           | 0         | 0.0         | 0.0       |
| SRSC2_006  | RICE    | 349         | 0.47  | 184           | 165         | 0        | 0           | 0         | 0.0         | 0.0       |
| SRSC3_005  | RICE    | 278         | 0.12  | 246           | 32          | 0        | 0           | 0         | 0.0         | 0.0       |
| SRSC3_007  | RICE    | 396         | 0.15  | 337           | 59          | 0        | 0           | 0         | 0.0         | 0.0       |
| SRSC4_002  | RICE    | 377         | 0.31  | 259           | 118         | 0        | 0           | 0         | 0.0         | 0.0       |
| SRSC4_003  | RICE    | 384         | 0.49  | 197           | 187         | 0        | 0           | 0         | 0.0         | 0.0       |
| SRSC4_005  | RICE    | 198         | 0.80  | 40            | 158         | 0        | 0           | 0         | 0.0         | 0.0       |
| SRSC4_006  | RICE    | 208         | 0.50  | 105           | 103         | 4        | 4           | 0         | 38.1        | 0.0       |
| SRSC4_007  | RICE    | 530         | 0.62  | 200           | 330         | 2        | 2           | 0         | 10.0        | 0.0       |
| SRSC4_008  | RICE    | 530         | 0.43  | 302           | 228         | 1        | 1           | 0         | 3.3         | 0.0       |
| SRSC4_011  | RICE    | 372         | 0.61  | 145           | 227         | 0        | 0           | 0         | 0.0         | 0.0       |
| SRSC4_012  | RICE    | 294         | 0.54  | 135           | 159         | 0        | 0           | 0         | 0.0         | 0.0       |
| SRSC4_013  | RICE    | 185         | 0.32  | 125           | 60          | 0        | 0           | 0         | 0.0         | 0.0       |
| SRSC4_014  | RICE    | 528         | 0.47  | 282           | 246         | 2        | 2           | 0         | 7.1         | 0.0       |
| SRSC4_018  | RICE    | 342         | 0.91  | 31            | 311         | 0        | 0           | 0         | 0.0         | 0.0       |
| SRSC4_020  | RICE    | 414         | 0.11  | 370           | 44          | 0        | 0           | 0         | 0.0         | 0.0       |
| SRSC4_028  | RICE    | 256         | 0.48  | 134           | 122         | 0        | 0           | 0         | 0.0         | 0.0       |
| SRSC5_006  | RICE    | 502         | 0.22  | 392           | 110         | 0        | 0           | 0         | 0.0         | 0.0       |
| SRSC5_007  | RICE    | 511         | 0.13  | 444           | 67          | 0        | 0           | 0         | 0.0         | 0.0       |
| SRSC6_001  | RICE    | 533         | 0.30  | 372           | 161         | 0        | 0           | 0         | 0.0         | 0.0       |
| SRSC6_002  | RICE    | 514         | 0.25  | 383           | 131         | 2        | 2           | 0         | 5.2         | 0.0       |
| SRSC7_001  | RICE    | 388         | 0.16  | 325           | 63          | 1        | 1           | 0         | 3.1         | 0.0       |
| SRSC7_004  | RICE    | 592         | 0.04  | 566           | 26          | 13       | 13          | 0         | 23.0        | 0.0       |
| SRSC7_006  | RICE    | 531         | 0.05  | 507           | 24          | 0        | 0           | 0         | 0.0         | 0.0       |
| SRSC7_007  | RICE    | 322         | 0.22  | 251           | 71          | 3        | 3           | 0         | 12.0        | 0.0       |
| SRSC8_002  | RICE    | 527         | 0.31  | 364           | 163         | 0        | 0           | 0         | 0.0         | 0.0       |
| SRSC8_004  | RICE    | 517         | 0.26  | 383           | 134         | 4        | 4           | 0         | 10.4        | 0.0       |
| SRSC8_005  | RICE    | 522         | 0.08  | 478           | 44          | 2        | 2           | 0         | 4.2         | 0.0       |
| SRSC8_007  | RICE    | 511         | 0.10  | 459           | 52          | 3        | 3           | 0         | 6.5         | 0.0       |
| SRSC8_008  | RICE    | 443         | 0.10  | 398           | 45          | 0        | 0           | 0         | 0.0         | 0.0       |
| SRSC9_001  | RICE    | 295         | 0.42  | 170           | 125         | 0        | 0           | 0         | 0.0         | 0.0       |
| SRSC9_002  | RICE    | 572         | 0.04  | 549           | 23          | 5        | 5           | 0         | 9.1         | 0.0       |
| SRSC9_003  | RICE    | 412         | 0.35  | 268           | 144         | 1        | 1           | 0         | 3.7         | 0.0       |
| SRSC9_004  | RICE    | 441         | 0.11  | 392           | 49          | 4        | 4           | 0         | 10.2        | 0.0       |
| SRSC4_024  | RICE    | 457         | 0.97  | 15            | 442         | 1        | 1           | 0         | 66.7        | 0.0       |
| SRSC4_022  | RICE    | 466         | 0.95  | 25            | 441         | 1        | 1           | 0         | 40.0        | 0.0       |
| SRSC4_004  | RICE    | 417         | 0.96  | 15            | 402         | 1        | 1           | 0         | 66.7        | 0.0       |
| SRSC4_017  | RICE    | 344         | 0.96  | 14            | 330         | 1        | 1           | 0         | 71.4        | 0.0       |
| SRSC5_003  | RICE    | 308         | 0.89  | 34            | 274         | 3        | 2           | 1         | 58.8        | 3.6       |
| SRSC6_007  | RICE    | 523         | 0.49  | 266           | 257         | 6        | 5           | 1         | 18.8        | 3.9       |
| SRSC8_006  | RICE    | 519         | 0.40  | 311           | 208         | 2        | 1           | 1         | 3.2         | 4.8       |
| SRSC4_016  | RICE    | 200         | 0.87  | 26            | 174         | 1        | 1           | 0         | 38.5        | 0.0       |
| SRSC4_019  | RICE    | 365         | 0.94  | 21            | 344         | 2        | 2           | 0         | 95.2        | 0.0       |
| PRSC10_066 | RICE    | 347         | 0.39  | 210           | 137         | 2        | 1           | 1         | 4.8         | 7.3       |
| PRSC1_021  | RICE    | 518         | 0.26  | 382           | 136         | 1        | 1           | 0         | 2.6         | 0.0       |
| SRSC6_008  | RICE    | 231         | 0.55  | 104           | 127         | 1        | 1           | 0         | 9.6         | 0.0       |
| PRSC4_050  | RICE    | 479         | 0.47  | 253           | 226         | 3        | 1           | 2         | 4.0         | 8.8       |
| PRSC1_006  | RICE    | 201         | 0.45  | 110           | 91          | 1        | 1           | 0         | 9.1         | 0.0       |
| SRSC5_005  | RICE    | 527         | 0.51  | 258           | 269         | 4        | 1           | 3         | 3.9         | 11.2      |
| SRSC11_007 | RICE    | 381         | 0.42  | 220           | 161         | 2        | 2           | 0         | 9.1         | 0.0       |
| SRSC12_008 | RICE    | 496         | 0.16  | 416           | 80          | 2        | 1           | 1         | 2.4         | 12.5      |
| PRSC1_008  | RICE    | 525         | 0.37  | 331           | 194         | 3        | 3           | 0         | 9.1         | 0.0       |
| SRSC12_002 | RICE    | 452         | 0.25  | 339           | 113         | 3        | 1           | 2         | 2.9         | 17.7      |
| SRSC4_021  | RICE    | 373         | 0.22  | 290           | 83          | 2        | 2           | 0         | 6.9         | 0.0       |
| SRSC7_005  | RICE    | 498         | 0.16  | 417           | 81          | 5        | 3           | 2         | 7.2         | 24.7      |
| SRSC10_007 | RICE    | 528         | 0.37  | 332           | 196         | 9        | 4           | 5         | 12.0        | 25.5      |
| SRSC9_005  | RICE    | 516         | 0.14  | 442           | 74          | 4        | 2           | 2         | 4.5         | 27.0      |
| PRSC1_017  | RICE    | 414         | 0.26  | 307           | 107         | 12       | 9           | 3         | 29.3        | 28.0      |
| PRSC1_022  | RICE    | 245         | 0.53  | 116           | 129         | 7        | 3           | 4         | 25.9        | 31.0      |
| SRSC11_006 | RICE    | 529         | 0.06  | 497           | 32          | 7        | 6           | 1         | 12.1        | 31.3      |
| PRSC1_015  | RICE    | 540         | 0.11  | 479           | 61          | 31       | 29          | 2         | 60.5        | 32.8      |
| PRSC1_014  | RICE    | 528         | 0.29  | 375           | 153         | 30       | 24          | 6         | 64.0        | 39.2      |

|        |         |      |
|--------|---------|------|
| AVG    | 12.1    | 3.6  |
| STDDEV | 19.4    | 9.0  |
| n      | 87.0    | 87.0 |
| TTEST  | 0.00026 |      |
