# Supplementary material
Source: PubMed Central journal article supplement (PMC1435799)

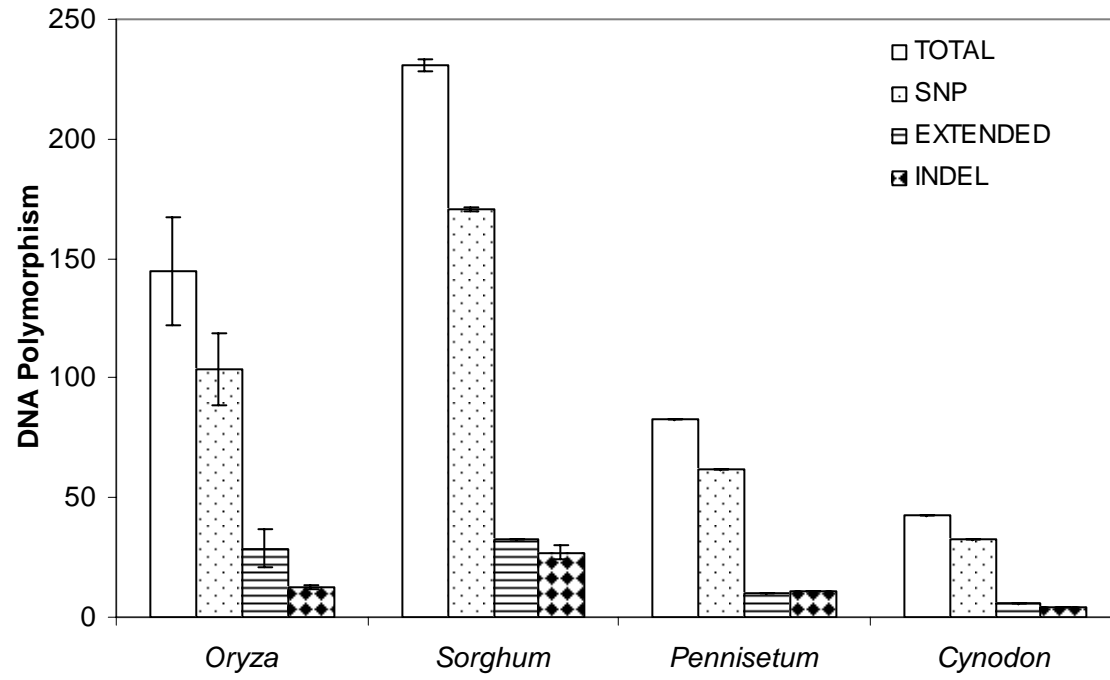

Supplement: plntphys_140_4_1183__2.pdf [file plntphys_140_4_1183__2.pdf]

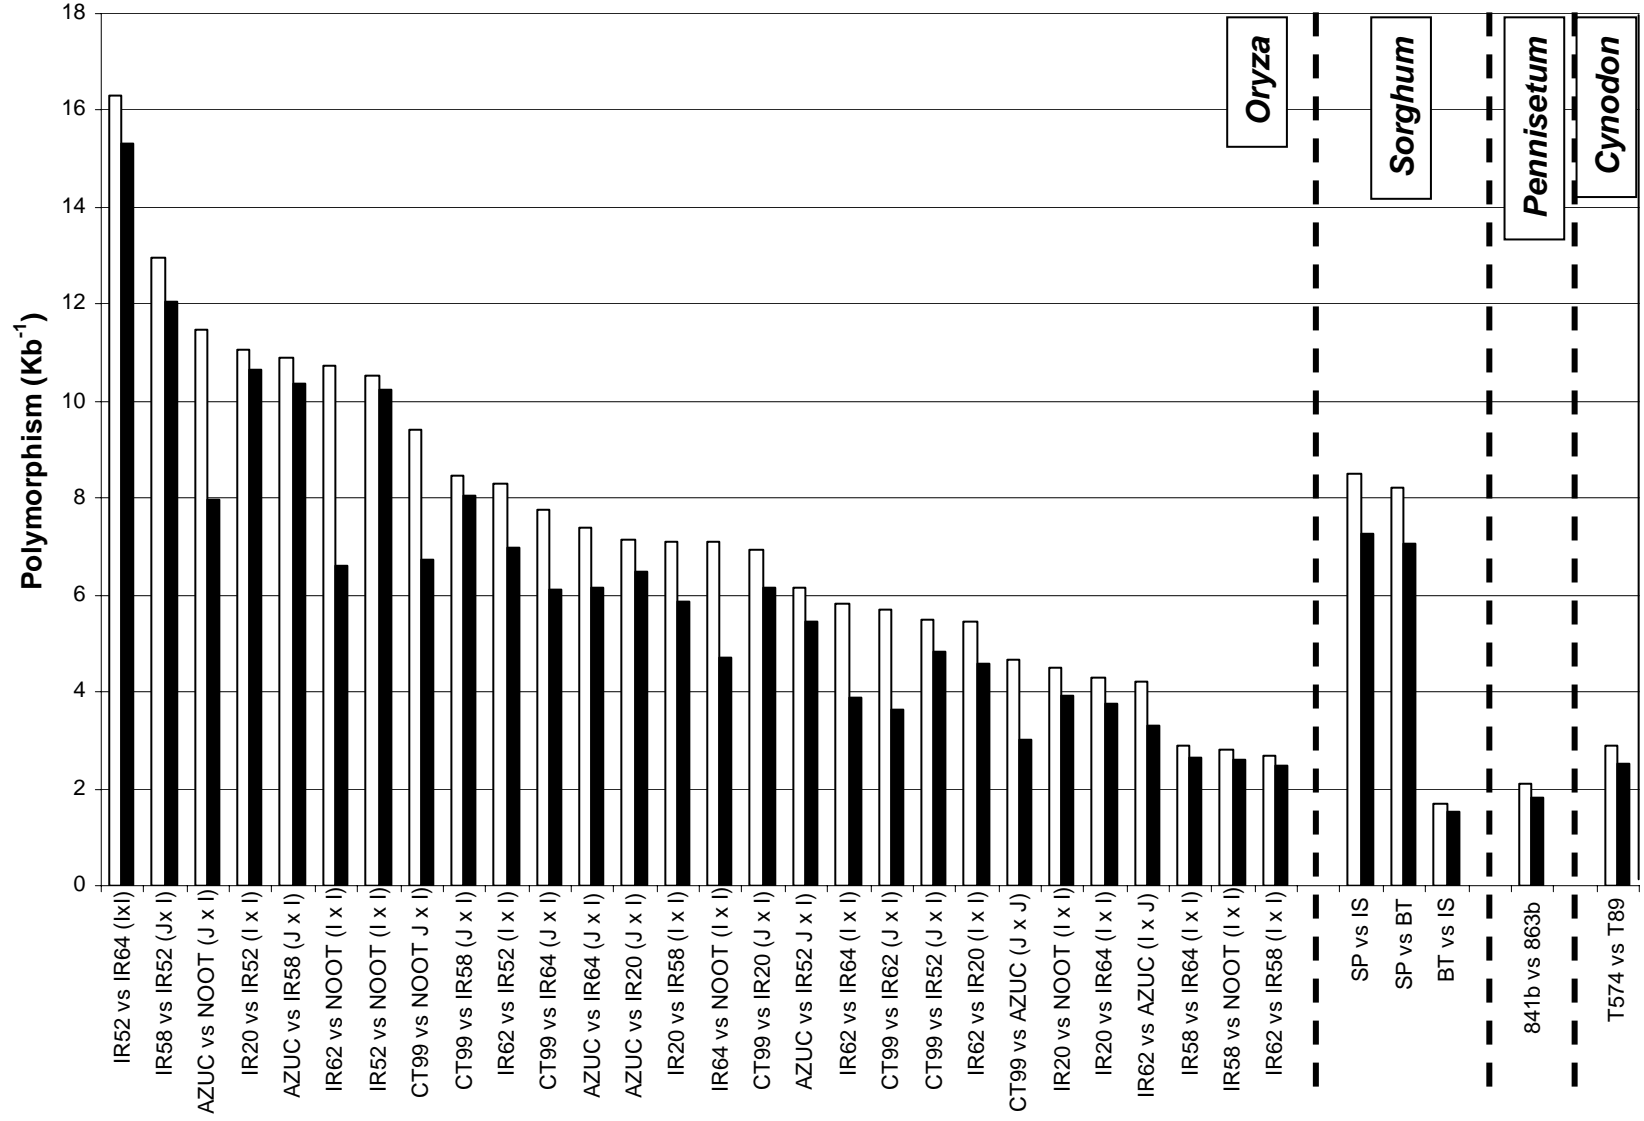

Supplement: plntphys_140_4_1183__3.pdf [file plntphys_140_4_1183__3.pdf]

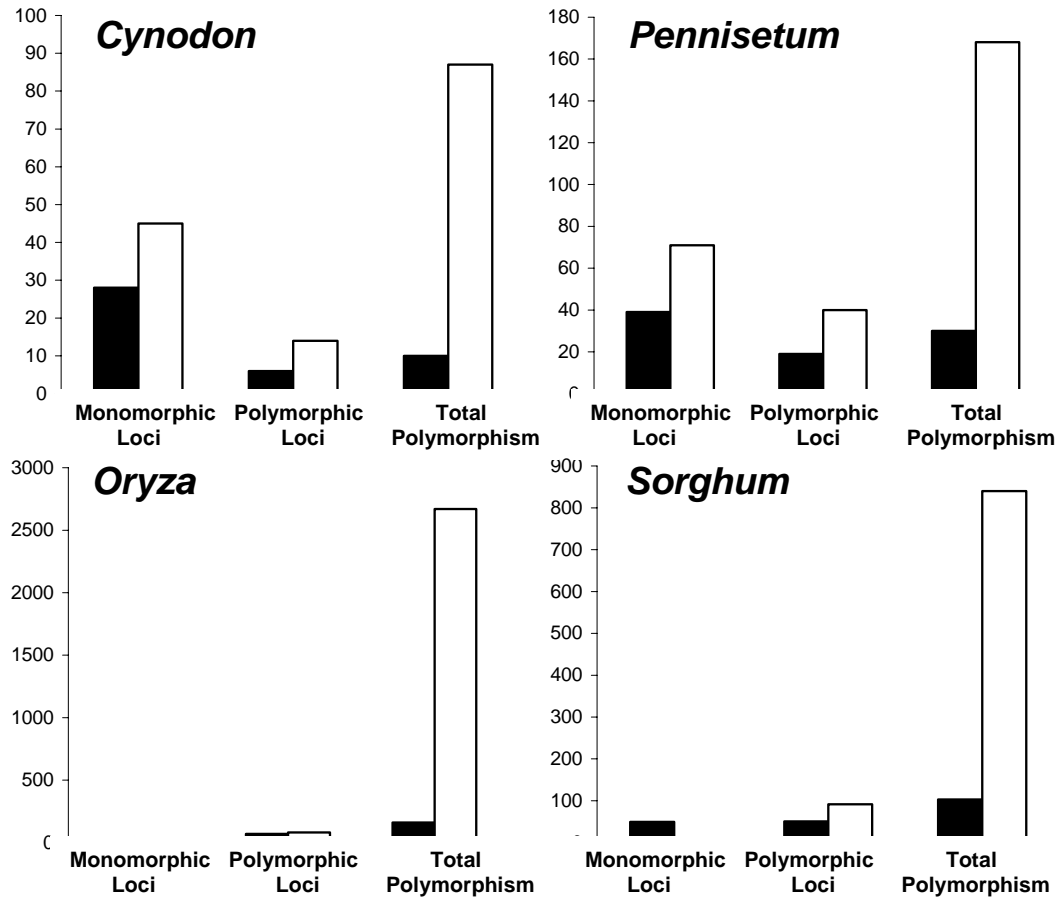

Supplement: plntphys_140_4_1183__4.pdf [file plntphys_140_4_1183__4.pdf]

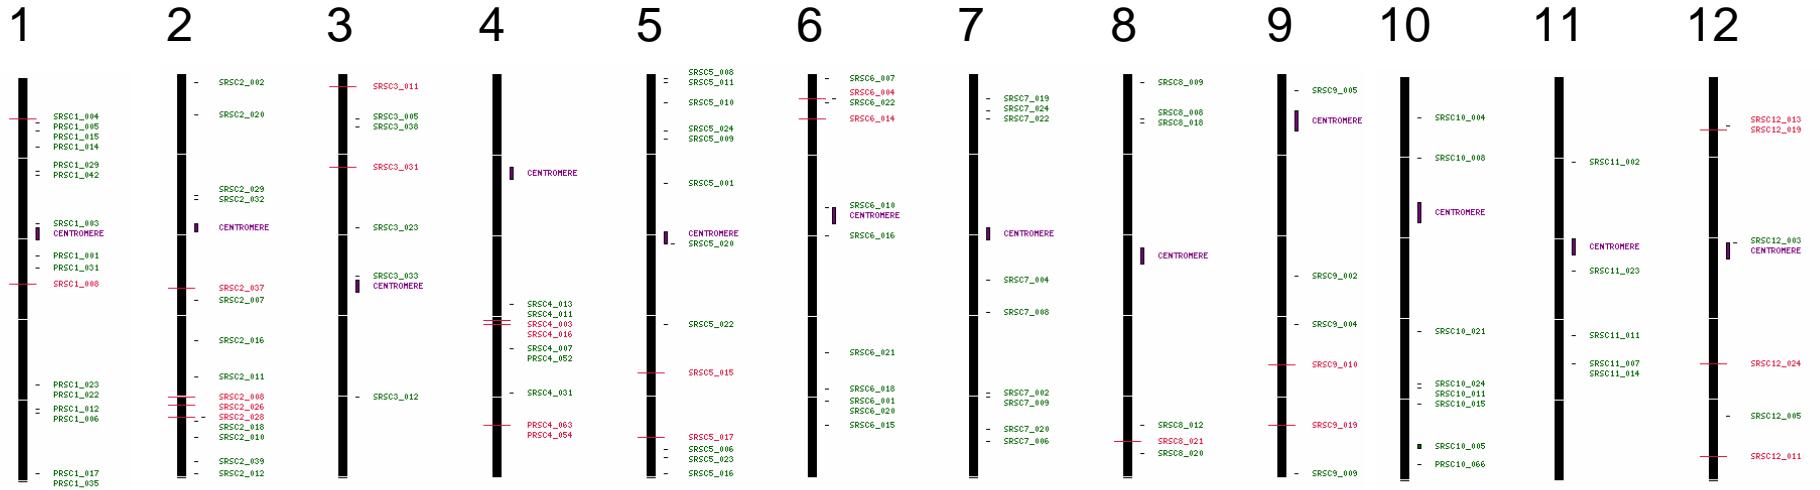

Feature Types:  
 ■ Centromere  
 ■ D-LOCUS  
 ■ S-LOCUS

Supplement: plntphys_140_4_1183__5.pdf [file plntphys_140_4_1183__5.pdf]
